# Supplementary material
Source: publisher site journal article supplement (https://www.spandidos-publications.com/1328/downloadSupplementary)
Supplement: Supplementary file 1 [file downloadSupplementary]

## Sheet: All
Table SIII. Differentially expressed mRNAs.
Gene ID	Gene name	NEC	CTL	Fold change	log2FC	P-value
ENSG00000115386	REG1A	0.0296793	187.63	0.00015818	-12.6261	1.28871e-168
ENSG00000173702	MUC13	0.0699068	359.157	0.000194641	-12.3269	8.12186e-215
ENSG00000168955	TM4SF20	0.0262073	134.206	0.000195277	-12.3222	1.15103e-159
ENSG00000138823	MTTP	0.0428046	159.508	0.000268353	-11.8636	1.72628e-216
ENSG00000187908	DMBT1	0.0829559	292.254	0.000283848	-11.7826	5.40785e-228
ENSG00000090402	SI	0.0448288	149.467	0.000299924	-11.7031	3.44847e-196
ENSG00000114113	RBP2	0.421222	1223.56	0.00034426	-11.5042	9.57917e-206
ENSG00000079112	CDH17	0.0309808	88.5322	0.000349938	-11.4806	3.59935e-163
ENSG00000148942	SLC5A12	0.00768826	21.8253	0.000352264	-11.4711	7.2669e-135
ENSG00000145384	FABP2	0.180184	422.094	0.00042688	-11.1939	1.75163e-196
ENSG00000110244	APOA4	2.4249	5613.17	0.000432002	-11.1767	5.80992e-256
ENSG00000141434	MEP1B	0.0236415	54.1141	0.000436883	-11.1605	5.81496e-126
ENSG00000184434	LRRC19	0.0185246	41.4404	0.000447018	-11.1274	5.23864e-125
ENSG00000118137	APOA1	0.397308	854.936	0.000464723	-11.0713	2.03527e-210
ENSG00000135220	UGT2A3	0.0370136	70.9069	0.000522003	-10.9037	2.90907e-146
ENSG00000119888	EPCAM	0.069515	115.711	0.000600765	-10.7009	1.92142e-166
ENSG00000163295	ALPI	0.246844	404.996	0.000609497	-10.6801	5.10397e-202
ENSG00000015520	NPC1L1	0.0107418	17.2145	0.000623998	-10.6462	2.00739e-111
ENSG00000151715	TMEM45B	0.0180788	28.738	0.000629091	-10.6344	4.16638e-111
ENSG00000182156	ENPP7	0.0778205	115.949	0.000671162	-10.5411	9.95469e-162
ENSG00000100170	SLC5A1	0.0589688	85.4797	0.000689857	-10.5014	1.48318e-181
ENSG00000112818	MEP1A	0.153712	210.136	0.000731487	-10.4169	7.2639e-184
ENSG00000012504	NR1H4	0.0131546	17.1721	0.000766045	-10.3503	3.17593e-103
ENSG00000002726	AOC1	0.00820206	10.5955	0.000774104	-10.3352	8.08781e-103
ENSG00000162896	PIGR	0.169574	203.055	0.000835112	-10.2257	1.81812e-188
ENSG00000125255	SLC10A2	0.0196815	23.1632	0.000849686	-10.2008	3.93348e-99
ENSG00000106541	AGR2	0.0190367	22.3926	0.000850132	-10.2	3.93348e-99
ENSG00000163586	FABP1	0.14316	165.489	0.000865073	-10.1749	5.48057e-180
ENSG00000174358	SLC6A19	0.0725649	81.868	0.000886365	-10.1398	7.84927e-171
ENSG00000115850	LCT	0.141417	158.045	0.000894794	-10.1262	8.27617e-193
ENSG00000164816	DEFA5	0.165649	180.012	0.000920211	-10.0857	5.16862e-96
ENSG00000070019	GUCY2C	0.0319587	32.7576	0.00097561	-10.0014	2.67652e-120
ENSG00000140832	MARVELD3	0.00749534	7.54326	0.000993648	-9.97498	4.7235e-93
ENSG00000158125	XDH	0.0609102	61.1607	0.000995904	-9.97171	1.83555e-153
ENSG00000160868	CYP3A4	0.101592	98.4647	0.00103176	-9.92068	9.7812e-159
ENSG00000103534	TMC5	0.0323336	30.6912	0.00105351	-9.89058	1.10715e-142
ENSG00000084674	APOB	0.610197	550.576	0.00110829	-9.81745	1.30215e-230
ENSG00000118094	TREH	0.0160087	14.3703	0.00111401	-9.81003	8.09178e-90
ENSG00000172016	REG3A	0.0878771	78.277	0.00112264	-9.79888	4.2383e-130
ENSG00000169876	MUC17	0.103507	90.1036	0.00114876	-9.76571	1.80238e-195
ENSG00000165556	CDX2	0.0331621	26.2408	0.00126376	-9.62806	8.60467e-110
ENSG00000167183	PRR15L	0.09798	72.5694	0.00135016	-9.53266	3.86166e-107
ENSG00000127831	VIL1	0.0942449	68.127	0.00138337	-9.4976	1.33348e-163
ENSG00000136872	ALDOB	1.15133	802.136	0.00143533	-9.4444	4.47448e-204
ENSG00000105398	SULT2A1	0.149805	99.8772	0.0014999	-9.38092	5.94891e-128
ENSG00000166391	MOGAT2	0.0615855	38.3504	0.00160586	-9.28244	4.57211e-140
ENSG00000140297	GCNT3	0.00696146	4.32228	0.0016106	-9.27819	4.24541e-76
ENSG00000275410	HNF1B	0.00821746	5.07166	0.00162027	-9.26955	6.9846e-76
ENSG00000132437	DDC	0.0249383	15.3909	0.00162032	-9.2695	6.67795e-100
ENSG00000171431	KRT20	0.0728139	44.6681	0.00163011	-9.26082	1.15103e-99
ENSG00000249948	GBA3	0.0277982	16.8985	0.00164501	-9.24769	2.61929e-99
ENSG00000100604	CHGA	0.0722267	42.1672	0.00171286	-9.18937	1.02912e-130
ENSG00000198944	SOWAHA	0.023163	13.4657	0.00172014	-9.18326	1.05213e-73
ENSG00000166869	CHP2	0.0937061	53.8007	0.00174173	-9.16527	4.15191e-112
ENSG00000060566	CREB3L3	0.0997531	55.9997	0.00178132	-9.13284	9.98037e-136
ENSG00000189325	C6orf222	0.019908	10.1468	0.001962	-8.99346	4.83864e-69
ENSG00000169894	MUC3A	0.384398	191.831	0.00200384	-8.96302	1.47105e-198
ENSG00000101076	HNF4A	0.0199346	9.82258	0.00202946	-8.94469	1.53541e-116
ENSG00000164749	HNF4G	0.11346	53.2618	0.00213024	-8.87477	1.82775e-138
ENSG00000095932	SMIM24	0.170665	79.147	0.00215631	-8.85722	2.93463e-133
ENSG00000175311	ANKS4B	0.0512886	23.5555	0.00217735	-8.84321	3.64872e-103
ENSG00000052344	PRSS8	0.0579901	25.9244	0.0022369	-8.80429	1.36077e-112
ENSG00000233041	PHGR1	0.152335	67.725	0.00224932	-8.79629	3.34503e-87
ENSG00000010438	PRSS3	0.0265251	11.7823	0.00225125	-8.79505	2.83702e-64
ENSG00000171747	LGALS4	0.33153	139.005	0.00238502	-8.71178	2.55137e-161
ENSG00000176920	FUT2	0.0128523	5.36752	0.00239446	-8.70609	3.47201e-62
ENSG00000137860	SLC28A2	0.0240012	9.75158	0.00246127	-8.66638	8.71235e-84
ENSG00000139540	SLC39A5	0.0575751	23.1436	0.00248773	-8.65095	2.63539e-108
ENSG00000132698	RAB25	0.0194549	7.69231	0.00252914	-8.62714	2.2925e-60
ENSG00000073067	CYP2W1	0.0291598	11.5144	0.00253247	-8.62524	1.02918e-82
ENSG00000134193	REG4	0.0470803	18.1433	0.00259491	-8.5901	3.0062e-96
ENSG00000119125	GDA	0.0637804	22.9501	0.00277909	-8.49117	3.35447e-140
ENSG00000016490	CLCA1	0.158061	56.8269	0.00278144	-8.48995	1.58135e-130
ENSG00000229719	MIR194-2HG	0.122428	43.984	0.00278346	-8.4889	2.85713e-117
ENSG00000009765	IYD	0.00397245	1.37679	0.0028853	-8.43706	4.50402e-56
ENSG00000135100	HNF1A	0.00580838	1.98798	0.00292175	-8.41895	1.16343e-55
ENSG00000006555	TTC22	0.0179944	6.02216	0.00298803	-8.38659	1.35666e-76
ENSG00000196660	SLC30A10	0.0079377	2.6432	0.00300306	-8.37935	9.38261e-55
ENSG00000142677	IL22RA1	0.0797741	25.8487	0.0030862	-8.33995	1.56155e-89
ENSG00000138109	CYP2C9	0.122495	38.6379	0.00317033	-8.30115	5.69679e-112
ENSG00000115474	KCNJ13	0.0116068	3.57098	0.00325031	-8.26521	2.73307e-52
ENSG00000088386	SLC15A1	0.148609	45.1237	0.00329337	-8.24622	4.41094e-133
ENSG00000166959	MS4A8	0.0262258	7.84583	0.00334265	-8.22479	1.24542e-73
ENSG00000257743	MGAM2	0.172567	51.421	0.00335597	-8.21905	2.7248e-150
ENSG00000184363	PKP3	0.0195445	5.6298	0.00347162	-8.17017	3.10926e-72
ENSG00000074276	CDHR2	0.317568	90.8345	0.00349612	-8.16003	1.62525e-153
ENSG00000104537	ANXA13	0.0283004	8.04706	0.00351686	-8.1515	8.97769e-72
ENSG00000105289	TJP3	0.0496271	14.1035	0.00351877	-8.15071	1.45816e-94
ENSG00000178462	TUBAL3	0.0471882	13.3449	0.00353605	-8.14364	1.37639e-71
ENSG00000228477	RP3-342P20.2	0.102588	28.7105	0.00357318	-8.12857	1.66987e-50
ENSG00000106258	CYP3A5	0.126421	35.3032	0.00358102	-8.12542	1.64344e-145
ENSG00000165215	CLDN3	0.175202	47.7168	0.00367171	-8.08933	6.24243e-83
ENSG00000156510	HKDC1	0.106452	28.8487	0.00369002	-8.08216	3.69713e-111
ENSG00000102837	OLFM4	3.36493	909.331	0.00370044	-8.07809	6.65313e-178
ENSG00000163362	C1orf106	0.0490429	13.253	0.0037005	-8.07806	2.148e-99
ENSG00000105388	CEACAM5	0.0230782	6.20592	0.00371875	-8.07097	8.75777e-70
ENSG00000099812	MISP	0.389493	103.861	0.00375014	-8.05884	1.33924e-140
ENSG00000178401	DNAJC22	0.0344882	9.11606	0.00378324	-8.04616	8.51936e-82
ENSG00000183421	RIPK4	0.034081	8.9963	0.00378833	-8.04422	3.77586e-69
ENSG00000174827	PDZK1	0.157244	41.3861	0.00379944	-8.04	1.62749e-114
ENSG00000138079	SLC3A1	0.048011	12.4689	0.00385045	-8.02076	1.95315e-109
ENSG00000099834	CDHR5	0.427666	110.24	0.00387942	-8.00994	1.48353e-158
ENSG00000198758	EPS8L3	0.107255	27.3607	0.00392005	-7.99491	2.3609e-116
ENSG00000189334	S100A14	0.0822128	19.8184	0.00414831	-7.91326	2.16852e-78
ENSG00000170827	CELP	0.0531827	12.5138	0.00424994	-7.87834	1.77921e-77
ENSG00000171124	FUT3	0.0285542	6.61292	0.00431794	-7.85544	6.78315e-77
ENSG00000131096	PYY	0.0514715	11.861	0.00433955	-7.84824	8.95332e-45
ENSG00000244067	GSTA2	0.056646	12.8785	0.00439851	-7.82877	2.08481e-44
ENSG00000138308	PLA2G12B	0.0659364	14.9091	0.00442255	-7.82091	3.18986e-44
ENSG00000117834	SLC5A9	0.040156	9.06262	0.00443095	-7.81817	1.48443e-98
ENSG00000144410	CPO	0.0615188	13.7583	0.00447141	-7.80505	6.05764e-44
ENSG00000183778	B3GALT5	0.0508685	11.3756	0.00447171	-7.80496	6.08801e-123
ENSG00000146039	SLC17A4	0.0391199	8.64157	0.00452694	-7.78725	7.24361e-85
ENSG00000158764	ITLN2	0.0331741	7.31666	0.00453404	-7.78499	1.78037e-43
ENSG00000189143	CLDN4	0.0329969	7.0259	0.00469646	-7.73421	5.09003e-91
ENSG00000198074	AKR1B10	0.123052	26.1565	0.00470447	-7.73175	2.03703e-83
ENSG00000168907	PLA2G4F	0.00705256	1.4814	0.00476074	-7.7146	3.88021e-42
ENSG00000143375	CGN	0.101505	21.2026	0.00478736	-7.70655	8.60448e-115
ENSG00000113303	BTNL8	0.112524	22.9026	0.00491314	-7.66914	4.72255e-119
ENSG00000137648	TMPRSS4	0.00774197	1.54886	0.0049985	-7.64429	1.10535e-59
ENSG00000085552	IGSF9	0.0616983	12.1957	0.005059	-7.62693	5.82989e-103
ENSG00000076826	CAMSAP3	0.0672158	13.1664	0.00510511	-7.61384	8.09154e-88
ENSG00000166866	MYO1A	0.495603	92.832	0.0053387	-7.5493	2.10577e-144
ENSG00000170421	KRT8	0.188217	32.2838	0.00583007	-7.42227	6.0084e-138
ENSG00000130234	ACE2	0.171366	29.3897	0.00583083	-7.42208	1.53242e-109
ENSG00000118322	ATP10B	0.0704893	11.9234	0.00591186	-7.40217	3.61332e-115
ENSG00000100558	PLEK2	0.0263186	4.40634	0.00597288	-7.38736	4.13222e-36
ENSG00000275718	CCL15	0.0415278	6.77314	0.00613125	-7.3496	1.9489e-35
ENSG00000039068	CDH1	0.277814	44.6692	0.00621935	-7.32902	4.55392e-143
ENSG00000169906	S100G	0.163464	25.8529	0.00632286	-7.30521	1.2273e-34
ENSG00000266200	PNLIPRP2	0.0686493	10.6396	0.00645224	-7.27598	1.98069e-51
ENSG00000148735	PLEKHS1	0.0608781	9.40229	0.00647481	-7.27095	3.31018e-93
ENSG00000124429	POF1B	0.176216	26.9734	0.00653293	-7.25805	3.45428e-99
ENSG00000021826	CPS1	0.648701	98.8242	0.0065642	-7.25117	1.21999e-150
ENSG00000115263	GCG	0.0629109	9.57065	0.00657331	-7.24916	4.95829e-63
ENSG00000175084	DES	14.3632	2114.92	0.00679135	-7.20209	4.42289e-161
ENSG00000138075	ABCG5	0.0712449	10.2885	0.0069247	-7.17403	2.82296e-86
ENSG00000145113	MUC4	0.00618046	0.889186	0.0069507	-7.16863	3.72601e-49
ENSG00000204385	SLC44A4	0.198973	27.7926	0.0071592	-7.12599	2.80862e-105
ENSG00000276490	RP11-400G3.5	0.186428	25.3442	0.00735585	-7.08689	4.78231e-79
ENSG00000163624	CDS1	0.138684	18.4407	0.00752051	-7.05495	4.08737e-91
ENSG00000170689	HOXB9	0.0288168	3.80984	0.00756378	-7.04668	2.08042e-30
ENSG00000234906	APOC2	0.0312637	4.13334	0.00756378	-7.04668	2.08042e-30
ENSG00000114455	HHLA2	0.0999272	13.0191	0.00767541	-7.02554	7.75762e-93
ENSG00000164855	TMEM184A	0.0360018	4.5127	0.00797789	-6.96978	4.09413e-85
ENSG00000108576	SLC6A4	0.0355433	4.23941	0.00838402	-6.89814	3.41598e-74
ENSG00000144852	NR1I2	0.0887023	10.4315	0.00850335	-6.87775	2.25528e-86
ENSG00000145864	GABRB2	0.00597976	0.701915	0.0085192	-6.87507	1.16067e-27
ENSG00000132744	ACY3	0.172558	20.2444	0.00852376	-6.8743	5.64694e-62
ENSG00000129354	AP1M2	0.0282252	3.19808	0.00882569	-6.82408	3.63742e-42
ENSG00000079689	SCGN	0.0296202	3.34878	0.00884507	-6.82091	6.5302e-28
ENSG00000182795	C1orf116	0.0351973	3.93915	0.00893524	-6.80628	2.16033e-60
ENSG00000139874	SSTR1	0.0519692	5.72363	0.00907978	-6.78313	2.01854e-52
ENSG00000163435	ELF3	0.186825	20.5223	0.00910351	-6.77936	2.47553e-114
ENSG00000183463	URAD	0.0798886	8.73585	0.00914491	-6.77282	3.27312e-27
ENSG00000184454	NCMAP	0.0281437	3.05905	0.00920015	-6.76413	5.35246e-52
ENSG00000015413	DPEP1	0.234482	25.3638	0.00924475	-6.75715	9.29811e-101
ENSG00000006611	USH1C	0.222623	24.0326	0.00926335	-6.75425	5.6769e-108
ENSG00000104321	TRPA1	0.0107527	1.15588	0.00930259	-6.74815	6.28215e-27
ENSG00000134716	CYP2J2	0.207678	22.1264	0.009386	-6.73527	5.68785e-93
ENSG00000176532	PRR15	0.170582	18.1607	0.00939292	-6.73421	2.03485e-65
ENSG00000179913	B3GNT3	0.156326	16.5071	0.00947028	-6.72238	3.02955e-82
ENSG00000280323	AC053503.12	0.0807551	8.42699	0.00958291	-6.70532	7.61125e-41
ENSG00000198788	MUC2	0.656649	68.0684	0.0096469	-6.69572	7.37505e-139
ENSG00000055732	MCOLN3	0.0578777	5.90104	0.00980804	-6.67182	6.26991e-81
ENSG00000152931	PART1	0.02177	2.1153	0.0102917	-6.60238	1.57156e-48
ENSG00000066230	SLC9A3	1.10026	106.804	0.0103016	-6.60098	4.18956e-120
ENSG00000243064	ABCC13	0.0112666	1.06091	0.0106198	-6.55711	4.81514e-38
ENSG00000135773	CAPN9	0.022295	2.0523	0.0108635	-6.52437	7.68487e-24
ENSG00000001626	CFTR	0.0503988	4.61496	0.0109207	-6.51679	2.37772e-69
ENSG00000254285	KRT8P3	0.0513294	4.66155	0.0110112	-6.50488	1.55299e-23
ENSG00000130768	SMPDL3B	0.0170901	1.5415	0.0110867	-6.49503	2.21167e-23
ENSG00000136574	GATA4	0.0188202	1.68921	0.0111415	-6.48792	3.65492e-46
ENSG00000165816	VWA2	0.116479	10.4378	0.0111594	-6.48559	1.41202e-72
ENSG00000188611	ASAH2	0.20725	18.417	0.0112532	-6.47352	1.79641e-99
ENSG00000197142	ACSL5	3.11526	275.407	0.0113115	-6.46607	6.24004e-137
ENSG00000256612	CYP2B7P	0.123379	10.8609	0.0113599	-6.45991	1.95776e-75
ENSG00000114248	LRRC31	0.028594	2.48066	0.0115268	-6.43887	6.29276e-36
ENSG00000172828	CES3	0.0325102	2.8204	0.0115268	-6.43887	5.03851e-52
ENSG00000113722	CDX1	0.477535	40.1505	0.0118936	-6.39367	1.84791e-81
ENSG00000108684	ASIC2	0.0122128	1.01858	0.01199	-6.38202	5.63507e-22
ENSG00000169994	MYO7B	0.64403	53.2089	0.0121038	-6.3684	7.86928e-126
ENSG00000145217	SLC26A1	0.0211469	1.70401	0.01241	-6.33235	4.80044e-34
ENSG00000100373	UPK3A	0.321451	25.5716	0.0125706	-6.3138	9.6539e-61
ENSG00000163017	ACTG2	16.6026	1308.23	0.0126909	-6.30006	2.57679e-137
ENSG00000186212	SOWAHB	0.0693192	5.45116	0.0127164	-6.29716	2.88233e-42
ENSG00000163898	LIPH	0.0638475	5.01525	0.0127307	-6.29555	4.20011e-55
ENSG00000244563	AC006011.4	0.213112	16.7209	0.0127453	-6.29389	7.51302e-21
ENSG00000178828	RNF186	0.119065	9.26342	0.0128533	-6.28172	3.02259e-33
ENSG00000069482	GAL	0.0508034	3.92328	0.0129492	-6.27099	1.59378e-20
ENSG00000021488	SLC7A9	0.352475	27.1586	0.0129784	-6.26774	6.11109e-89
ENSG00000139144	PIK3C2G	0.0764906	5.83889	0.0131002	-6.25427	8.36706e-67
ENSG00000170608	FOXA3	0.0294326	2.23657	0.0131597	-6.24773	2.32607e-20
ENSG00000271723	MROH7-TTC4	0.00825211	0.616874	0.0133773	-6.22407	4.9751e-20
ENSG00000164326	CARTPT	0.0572125	4.27684	0.0133773	-6.22407	4.9751e-20
ENSG00000162949	CAPN13	0.0467877	3.48847	0.0134121	-6.22032	2.96878e-48
ENSG00000167306	MYO5B	0.207343	15.4482	0.0134218	-6.21928	1.06828e-102
ENSG00000118160	SLC8A2	0.014714	1.09479	0.0134399	-6.21733	4.44238e-32
ENSG00000166268	MYRFL	0.142702	10.5548	0.0135202	-6.20874	4.17861e-69
ENSG00000111863	ADTRP	0.124285	9.01084	0.0137929	-6.17993	7.30696e-76
ENSG00000129214	SHBG	0.0760898	5.50878	0.0138125	-6.17789	2.42742e-47
ENSG00000170482	SLC23A1	0.326753	23.6385	0.0138229	-6.17679	2.32505e-87
ENSG00000124839	RAB17	0.142442	10.2823	0.0138531	-6.17365	1.17608e-88
ENSG00000141668	CBLN2	0.00845569	0.600748	0.0140753	-6.15069	3.41095e-19
ENSG00000163501	IHH	0.183905	13.0603	0.0140812	-6.15008	7.30695e-52
ENSG00000166126	AMN	0.33125	23.4934	0.0140997	-6.14819	1.09656e-95
ENSG00000198488	B3GNT6	0.024875	1.75192	0.0141987	-6.1381	5.03433e-19
ENSG00000108375	RNF43	0.067528	4.7534	0.0142062	-6.13733	8.94692e-75
ENSG00000140284	SLC27A2	0.132265	9.23891	0.0143161	-6.12621	1.07486e-63
ENSG00000140465	CYP1A1	0.060045	4.18341	0.0143531	-6.12249	2.55809e-56
ENSG00000232070	TMEM253	0.0983971	6.85414	0.0143559	-6.12222	2.89312e-51
ENSG00000203859	HSD3B2	0.224724	15.2537	0.0147324	-6.08486	9.23541e-78
ENSG00000167780	SOAT2	0.259776	17.4316	0.0149026	-6.06829	1.26698e-65
ENSG00000154639	CXADR	0.144791	9.58449	0.0151069	-6.04865	4.56329e-78
ENSG00000188761	BCL2L15	0.224619	14.8259	0.0151505	-6.04449	5.95823e-83
ENSG00000169903	TM4SF4	0.0280453	1.81926	0.0154158	-6.01945	1.1949e-17
ENSG00000183742	MACC1	0.208897	13.5398	0.0154284	-6.01827	1.2221e-94
ENSG00000135373	EHF	0.084814	5.43078	0.0156173	-6.00071	6.47482e-67
ENSG00000264717	CH17-360D5.1	0.0760898	4.86276	0.0156474	-5.99793	1.22877e-28
ENSG00000159166	LAD1	0.26892	16.7952	0.0160117	-5.96473	2.50305e-84
ENSG00000268505	RP11-805I24.3	0.0184145	1.11489	0.0165169	-5.91991	1.36879e-16
ENSG00000143627	PKLR	0.153197	9.08178	0.0168686	-5.88951	3.04773e-55
ENSG00000198643	FAM3D	0.0894262	5.28345	0.0169257	-5.88464	1.5392e-34
ENSG00000255774	AP000439.3	0.102447	5.94938	0.0172197	-5.8598	4.73102e-16
ENSG00000086205	FOLH1	0.272397	15.6849	0.0173668	-5.84753	1.93413e-87
ENSG00000282988	RP1-34B20.21	0.207672	11.9255	0.0174141	-5.8436	4.48699e-50
ENSG00000036565	SLC18A1	0.0107124	0.608863	0.0175941	-5.82876	1.09012e-15
ENSG00000254290	RP11-150O12.3	0.187634	10.6432	0.0176294	-5.82587	9.25869e-54
ENSG00000026559	KCNG1	0.0441223	2.49038	0.0177171	-5.81872	8.58918e-45
ENSG00000260459	FTLP14	0.15367	8.63926	0.0177874	-5.813	1.65874e-15
ENSG00000188959	C9orf152	0.0244578	1.37501	0.0177874	-5.813	1.65874e-15
ENSG00000101342	TLDC2	0.294119	16.2301	0.0181218	-5.78613	1.48332e-63
ENSG00000171564	FGB	0.0304795	1.675	0.0181968	-5.78017	2.5367e-25
ENSG00000147724	FAM135B	0.00442531	0.237854	0.0186052	-5.74815	5.9007e-15
ENSG00000175497	DPP10	0.0110837	0.595414	0.0186151	-5.74738	6.59138e-25
ENSG00000188833	ENTPD8	0.0658547	3.52754	0.0186688	-5.74323	1.04619e-38
ENSG00000162391	FAM151A	0.029894	1.58829	0.0188215	-5.73148	9.03706e-15
ENSG00000229894	RP11-668G10.2	0.0447511	2.37766	0.0188215	-5.73148	9.03706e-15
ENSG00000143954	REG3G	0.0507958	2.69737	0.0188316	-5.7307	1.25192e-24
ENSG00000213996	TM6SF2	0.231001	12.153	0.0190077	-5.71727	1.49587e-69
ENSG00000105357	MYH14	0.709573	37.1013	0.0191253	-5.70838	7.67537e-109
ENSG00000103067	ESRP2	0.0382732	1.98513	0.0192799	-5.69676	6.04032e-47
ENSG00000170835	CEL	0.371076	19.2169	0.0193099	-5.69452	5.72822e-69
ENSG00000099617	EFNA2	0.15683	8.08596	0.0193953	-5.68815	4.57055e-24
ENSG00000259230	CTD-2555C10.3	0.0928457	4.75833	0.0195123	-5.67948	6.33377e-24
ENSG00000168389	MFSD2A	0.474181	24.1626	0.0196246	-5.67119	7.63467e-92
ENSG00000121380	BCL2L14	0.0506632	2.57042	0.0197101	-5.66492	3.21945e-46
ENSG00000070526	ST6GALNAC1	0.14686	7.41643	0.0198019	-5.65822	6.57142e-67
ENSG00000164199	ADGRV1	0.0138495	0.69789	0.0198448	-5.65509	2.40869e-42
ENSG00000186115	CYP4F2	0.0708782	3.55411	0.0199426	-5.648	3.54815e-42
ENSG00000255277	ABCC6P2	0.0573891	2.87184	0.0199834	-5.64506	5.05452e-14
ENSG00000178301	AQP11	0.137935	6.88461	0.0200352	-5.64132	8.9054e-46
ENSG00000172367	PDZD3	0.0642014	3.18725	0.0201432	-5.63356	4.54789e-58
ENSG00000234996	RP11-480I12.9	0.0221754	1.096	0.0202331	-5.62714	7.80544e-14
ENSG00000138669	PRKG2	0.321256	15.8695	0.0202436	-5.62639	6.21258e-85
ENSG00000101311	FERMT1	0.0624643	3.0663	0.0203712	-5.61732	2.95697e-45
ENSG00000140279	DUOX2	0.0203837	0.991173	0.0205652	-5.60365	4.16729e-36
ENSG00000080031	PTPRH	0.45083	21.7712	0.0207077	-5.59369	9.47883e-85
ENSG00000204740	MALRD1	1.24884	60.0109	0.0208101	-5.58657	8.52225e-106
ENSG00000105523	FAM83E	0.188224	9.01427	0.0208807	-5.58168	4.37999e-54
ENSG00000164270	HTR4	0.0210296	1.00436	0.0209383	-5.57771	2.73562e-30
ENSG00000138798	EGF	0.0534356	2.53236	0.0211011	-5.56654	1.03392e-50
ENSG00000161132	XXbac-B444P24.10	0.360076	16.9717	0.0212163	-5.55868	4.85122e-44
ENSG00000036473	OTC	0.232671	10.9426	0.0212628	-5.55553	5.79313e-44
ENSG00000137766	UNC13C	0.0154192	0.720541	0.0213994	-5.54628	8.27161e-30
ENSG00000102109	PCSK1N	0.206424	9.55953	0.0215935	-5.53326	8.4809e-35
ENSG00000214814	FER1L6	0.145414	6.70424	0.0216899	-5.52683	1.26508e-59
ENSG00000152292	SH2D6	0.0134011	0.61266	0.0218737	-5.51466	7.02959e-13
ENSG00000228695	CES1P1	0.0170862	0.781131	0.0218737	-5.51466	7.02959e-13
ENSG00000224721	AC007182.6	0.0344494	1.57492	0.0218737	-5.51466	7.02959e-13
ENSG00000154269	ENPP3	0.225295	10.2128	0.02206	-5.50242	1.9979e-67
ENSG00000272410	RP11-438J1.1	0.17196	7.77771	0.0221094	-5.4992	3.36385e-49
ENSG00000237223	SULT1C2P1	0.0351994	1.56571	0.0224814	-5.47512	1.71351e-12
ENSG00000111057	KRT18	0.406323	18.023	0.0225448	-5.47106	9.34018e-83
ENSG00000164181	ELOVL7	0.170487	7.54063	0.0226091	-5.46695	6.86932e-77
ENSG00000182327	GLTPD2	0.0727041	3.18906	0.022798	-5.45495	2.6821e-12
ENSG00000141738	GRB7	0.0385574	1.69037	0.02281	-5.45419	1.89121e-33
ENSG00000181885	CLDN7	0.284937	12.4357	0.0229128	-5.4477	1.53535e-74
ENSG00000113924	HGD	0.0836232	3.60449	0.0231997	-5.42975	6.20446e-38
ENSG00000152939	MARVELD2	0.119432	5.11301	0.0233584	-5.41992	4.00247e-57
ENSG00000227258	SMIM2-AS1	0.0439031	1.84341	0.0238163	-5.39191	3.87927e-21
ENSG00000183840	GPR39	0.0783737	3.26656	0.0239928	-5.38126	1.62499e-40
ENSG00000143167	GPA33	0.757544	31.0874	0.0243682	-5.35886	4.01915e-79
ENSG00000165443	PHYHIPL	0.0908707	3.67949	0.0246966	-5.33955	2.54139e-43
ENSG00000152578	GRIA4	0.0269671	1.08789	0.0247884	-5.33419	1.37363e-39
ENSG00000147804	SLC39A4	0.445847	17.8161	0.0250249	-5.32049	1.08811e-81
ENSG00000176919	C8G	0.418902	16.555	0.0253037	-5.30451	6.54497e-53
ENSG00000157399	ARSE	0.165368	6.53505	0.0253049	-5.30444	8.73292e-46
ENSG00000103460	TOX3	0.045288	1.77105	0.0255713	-5.28933	1.21537e-38
ENSG00000258593	CTD-3051D23.4	0.0711734	2.77017	0.0256928	-5.28249	8.31848e-12
ENSG00000223572	CKMT1A	0.0384642	1.47279	0.0261166	-5.25889	2.2775e-25
ENSG00000111319	SCNN1A	0.0432876	1.63946	0.0264036	-5.24312	1.24482e-46
ENSG00000138030	KHK	0.396836	14.7937	0.0268246	-5.2203	1.85075e-75
ENSG00000224093	RP5-1033H22.2	0.0924256	3.44384	0.026838	-5.21958	7.83099e-25
ENSG00000232010	AP001059.5	0.142211	5.27146	0.0269775	-5.2121	2.15568e-11
ENSG00000134709	HOOK1	0.259954	9.55374	0.0272097	-5.19974	5.78689e-70
ENSG00000149418	ST14	1.38375	49.8036	0.0277841	-5.1696	1.97874e-89
ENSG00000227036	LINC00511	0.056434	2.00572	0.0281366	-5.15141	1.17351e-44
ENSG00000251637	RP11-119D9.1	0.100834	3.5697	0.0282474	-5.14574	5.95086e-36
ENSG00000068078	FGFR3	0.202505	7.16128	0.0282778	-5.14419	1.1647e-67
ENSG00000162188	GNG3	0.0843268	2.96953	0.0283974	-5.1381	9.12761e-11
ENSG00000258941	RP11-407N17.3	0.304965	10.7132	0.0284663	-5.1346	8.86474e-60
ENSG00000206159	GYG2P1	0.0669508	2.33572	0.0286639	-5.12462	6.58039e-18
ENSG00000133477	FAM83F	0.143817	4.9865	0.0288414	-5.11572	1.98791e-71
ENSG00000089199	CHGB	0.0801894	2.75631	0.0290931	-5.10318	5.47811e-36
ENSG00000256340	ABCC6P1	0.380916	13.0192	0.0292579	-5.09503	8.53047e-61
ENSG00000237289	CKMT1B	0.0681233	2.28966	0.0297526	-5.07084	5.84368e-38
ENSG00000164251	F2RL1	0.401551	13.4677	0.0298158	-5.06778	1.77927e-59
ENSG00000165140	FBP1	2.08783	69.9826	0.0298336	-5.06692	4.85006e-82
ENSG00000117971	CHRNB4	0.0110154	0.367487	0.0299751	-5.06009	2.41281e-10
ENSG00000147655	RSPO2	0.0317462	1.05871	0.0299857	-5.05958	1.27206e-22
ENSG00000180347	CCDC129	0.00788552	0.258199	0.0305405	-5.03313	3.93459e-10
ENSG00000115616	SLC9A2	0.0122551	0.401274	0.0305405	-5.03313	3.93459e-10
ENSG00000251169	AC005355.2	0.134446	4.39988	0.0305567	-5.03237	6.79579e-17
ENSG00000225345	SNX18P3	0.0863473	2.80852	0.0307448	-5.02351	4.72264e-22
ENSG00000188522	FAM83G	0.279856	9.08103	0.0308177	-5.0201	1.09172e-72
ENSG00000167774	CTD-2550O8.5	0.128235	4.11957	0.0311282	-5.00563	6.42891e-10
ENSG00000128298	BAIAP2L2	0.620478	19.6907	0.0315112	-4.98799	2.07933e-65
ENSG00000115884	SDC1	0.221593	7.02584	0.0315398	-4.98668	1.06766e-63
ENSG00000228146	CASP16P	0.0505109	1.60132	0.0315433	-4.98652	1.27669e-21
ENSG00000095110	NXPE1	0.0781542	2.46919	0.0316518	-4.98157	9.30385e-34
ENSG00000187017	ESPN	0.114762	3.6051	0.0318332	-4.97332	3.7619e-53
ENSG00000145920	CPLX2	0.043493	1.36441	0.0318767	-4.97135	8.16829e-30
ENSG00000255367	RP13-726E6.2	0.0953438	2.97303	0.0320696	-4.96265	3.31442e-16
ENSG00000153233	PTPRR	0.0269549	0.836354	0.0322291	-4.95549	3.30398e-26
ENSG00000149968	MMP3	0.0336088	1.03817	0.032373	-4.94907	1.72659e-09
ENSG00000278385	RP11-89H19.2	0.0426469	1.31736	0.032373	-4.94907	1.72659e-09
ENSG00000170381	SEMA3E	0.0191497	0.59122	0.0323902	-4.9483	4.94307e-16
ENSG00000116771	AGMAT	0.446479	13.7481	0.0324757	-4.9445	1.34886e-51
ENSG00000204175	GPRIN2	0.0812843	2.49698	0.0325531	-4.94106	5.94286e-26
ENSG00000115297	TLX2	0.0171651	0.519627	0.0330335	-4.91993	2.83788e-09
ENSG00000178473	UCN3	0.0619802	1.87629	0.0330335	-4.91993	2.83788e-09
ENSG00000158865	SLC5A11	0.0597462	1.79311	0.0333198	-4.90748	8.41102e-29
ENSG00000135702	CHST5	0.08124	2.43292	0.033392	-4.90435	1.94192e-25
ENSG00000167644	C19orf33	0.400085	11.9506	0.0334783	-4.90063	1.1963e-37
ENSG00000106688	SLC1A1	1.09076	32.4362	0.0336278	-4.8942	1.44574e-76
ENSG00000259354	RP11-519G16.3	0.0181805	0.539126	0.0337221	-4.89016	4.67356e-09
ENSG00000139292	LGR5	0.0953874	2.77245	0.0344054	-4.86122	3.61796e-48
ENSG00000163817	SLC6A20	0.146335	4.23701	0.0345373	-4.8557	3.1902e-53
ENSG00000197165	SULT1A2	0.268165	7.72034	0.0347349	-4.84747	7.04266e-51
ENSG00000142959	BEST4	0.181749	5.2302	0.0347499	-4.84685	6.98934e-28
ENSG00000183036	PCP4	0.240439	6.86644	0.0350165	-4.83582	2.15968e-24
ENSG00000171345	KRT19	0.104273	2.97245	0.0350796	-4.83322	3.35517e-31
ENSG00000262558	RP11-1260E13.3	0.0814636	2.3151	0.0351879	-4.82878	7.71158e-09
ENSG00000163449	TMEM169	0.0139082	0.395041	0.0352069	-4.828	8.4479e-15
ENSG00000130822	PNCK	0.0341298	0.948335	0.0359892	-4.79629	9.76046e-36
ENSG00000065621	GSTO2	0.0581693	1.6124	0.0360762	-4.79281	3.46399e-38
ENSG00000066248	NGEF	0.278887	7.71043	0.0361701	-4.78906	1.1482e-55
ENSG00000142661	MYOM3	0.100681	2.78199	0.0361902	-4.78826	1.48714e-49
ENSG00000162670	BRINP3	0.205081	5.64993	0.0362979	-4.78397	9.24931e-45
ENSG00000278535	DHRS11	0.527906	14.535	0.0363195	-4.78311	1.15196e-75
ENSG00000135525	MAP7	0.287367	7.85568	0.0365808	-4.77277	4.06319e-65
ENSG00000140675	SLC5A2	0.0197862	0.537563	0.0368072	-4.76387	2.915e-14
ENSG00000165238	WNK2	0.281251	7.625	0.0368853	-4.76081	2.61413e-75
ENSG00000142235	LMTK3	0.0705154	1.9073	0.0369713	-4.75745	1.81797e-26
ENSG00000188242	PP7080	2.79434	75.3298	0.0370948	-4.75264	1.50875e-82
ENSG00000006747	SCIN	0.163031	4.35712	0.0374171	-4.74016	1.11732e-61
ENSG00000196482	ESRRG	0.032009	0.851715	0.0375818	-4.73382	1.21782e-40
ENSG00000149435	GGTLC1	0.122777	3.26043	0.0376565	-4.73096	1.76211e-18
ENSG00000137709	POU2F3	0.0155081	0.411761	0.0376629	-4.73071	6.70597e-14
ENSG00000198650	TAT	0.0214362	0.569159	0.0376629	-4.73071	6.70597e-14
ENSG00000198203	SULT1C2	0.886043	23.2462	0.0381157	-4.71347	4.58033e-80
ENSG00000127324	TSPAN8	0.678768	17.7715	0.0381943	-4.7105	2.15624e-62
ENSG00000186231	KLHL32	0.014641	0.379902	0.0385389	-4.69754	5.82615e-08
ENSG00000171889	MIR31HG	0.0998339	2.59047	0.0385389	-4.69754	5.82615e-08
ENSG00000279535	AC113188.2	0.14414	3.74012	0.0385389	-4.69754	5.82615e-08
ENSG00000132517	SLC52A1	0.0233237	0.60498	0.0385529	-4.69702	5.15205e-18
ENSG00000279878	RP11-286N22.16	0.332585	8.62516	0.0385598	-4.69676	1.67645e-22
ENSG00000112378	PERP	0.468342	12.1354	0.0385931	-4.69551	2.08359e-57
ENSG00000168621	GDNF	0.127806	3.30591	0.0386599	-4.69302	2.96971e-36
ENSG00000186862	PDZD7	0.275238	7.10039	0.0387638	-4.68915	1.87205e-62
ENSG00000173597	SULT1B1	2.91649	74.9811	0.0388964	-4.68422	1.34663e-85
ENSG00000151882	CCL28	0.08256	2.1194	0.0389544	-4.68207	5.79766e-31
ENSG00000188037	CLCN1	0.150977	3.87574	0.0389544	-4.68207	5.79766e-31
ENSG00000185915	KLHL34	0.0408766	1.04747	0.0390243	-4.67948	2.36629e-13
ENSG00000162981	FAM84A	0.110028	2.81776	0.0390481	-4.67861	2.18995e-50
ENSG00000187902	SHISA7	0.00924043	0.234056	0.0394795	-4.66275	9.70402e-08
ENSG00000116299	KIAA1324	0.187801	4.74395	0.0395875	-4.65881	2.50657e-60
ENSG00000262406	MMP12	0.198527	4.97744	0.0398853	-4.648	9.2839e-25
ENSG00000064270	ATP2C2	0.118291	2.93804	0.0402617	-4.63445	3.48723e-48
ENSG00000095539	SEMA4G	0.247326	6.11515	0.0404448	-4.6279	1.76455e-65
ENSG00000139915	MDGA2	0.00604096	0.149284	0.0404662	-4.62714	9.70402e-08
ENSG00000251521	IMPA1P	0.0633529	1.56557	0.0404662	-4.62714	9.70402e-08
ENSG00000237070	AC005550.3	0.0596334	1.47314	0.0404806	-4.62663	3.15229e-17
ENSG00000127249	ATP13A4	0.113101	2.79357	0.0404864	-4.62642	1.36165e-44
ENSG00000168528	SERINC2	0.691197	16.9014	0.0408959	-4.6119	7.2356e-66
ENSG00000162989	KCNJ3	0.0752359	1.83965	0.0408968	-4.61187	2.99928e-36
ENSG00000177943	MAMDC4	2.1872	53.2306	0.0410892	-4.6051	1.15188e-81
ENSG00000167880	EVPL	0.113643	2.76311	0.0411286	-4.60371	3.34446e-53
ENSG00000163959	SLC51A	0.115488	2.80658	0.0411492	-4.60299	1.32104e-42
ENSG00000178773	CPNE7	0.0838961	2.03759	0.0411741	-4.60212	2.33277e-27
ENSG00000115255	REEP6	0.90954	22.0082	0.0413273	-4.59676	6.44669e-63
ENSG00000107165	TYRP1	0.0121968	0.293875	0.0415035	-4.59062	1.61919e-07
ENSG00000157992	KRTCAP3	0.119448	2.87645	0.0415261	-4.58984	5.82351e-21
ENSG00000238164	RP3-395M20.8	0.513892	12.3399	0.0416447	-4.58572	2.95236e-70
ENSG00000165272	AQP3	0.55311	13.1493	0.0420637	-4.57128	1.33774e-66
ENSG00000124205	EDN3	0.0794722	1.88926	0.0420652	-4.57123	1.19168e-31
ENSG00000166111	SVOP	0.00898155	0.210852	0.0425964	-4.55312	2.70647e-07
ENSG00000237226	RPS3AP39	0.0959694	2.25299	0.0425964	-4.55312	2.70647e-07
ENSG00000248544	CTB-47B11.3	0.0300267	0.704912	0.0425964	-4.55312	2.70647e-07
ENSG00000100031	GGT1	0.360464	8.42297	0.0427954	-4.5464	2.86872e-66
ENSG00000128422	KRT17	0.0402539	0.936395	0.0429882	-4.53992	2.88075e-16
ENSG00000196132	MYT1	0.0171425	0.396936	0.0431872	-4.53325	3.06841e-12
ENSG00000272405	RP11-284F21.10	0.277154	6.40327	0.0432832	-4.53005	1.964e-38
ENSG00000197635	DPP4	1.62301	37.2975	0.0435153	-4.52233	8.34315e-76
ENSG00000261150	EPPK1	0.240713	5.50543	0.0437229	-4.51547	1.5996e-72
ENSG00000184524	CEND1	0.0350666	0.80157	0.0437474	-4.51466	4.53154e-07
ENSG00000182253	SYNM	3.47145	79.1791	0.043843	-4.51151	2.98678e-85
ENSG00000166145	SPINT1	0.851413	19.409	0.0438669	-4.51072	1.76223e-70
ENSG00000117472	TSPAN1	0.134155	3.05594	0.0438998	-4.50964	7.26915e-33
ENSG00000147041	SYTL5	0.0424022	0.962192	0.0440683	-4.50411	5.92333e-20
ENSG00000204396	VWA7	0.0439992	0.996345	0.0441606	-4.5011	1.48186e-16
ENSG00000143340	FAM163A	0.0767301	1.73752	0.0441606	-4.5011	1.48186e-16
ENSG00000275234	CTD-2396E7.11	0.32443	7.34659	0.0441606	-4.5011	1.48186e-16
ENSG00000221947	XKR9	0.0730402	1.65367	0.0441684	-4.50084	7.61353e-26
ENSG00000163082	SGPP2	0.178455	4.03573	0.0442188	-4.4992	2.28005e-30
ENSG00000138675	FGF5	0.0108867	0.245361	0.0443701	-4.49427	7.29609e-12
ENSG00000277196	AC007325.2	0.422303	9.44321	0.0447203	-4.48293	3.9658e-40
ENSG00000124602	UNC5CL	1.21063	27.0364	0.0447776	-4.48108	3.35425e-65
ENSG00000117598	PLPPR5	0.0101427	0.225582	0.0449622	-4.47514	7.59982e-07
ENSG00000240224	UGT1A5	0.0317169	0.705413	0.0449622	-4.47514	7.59982e-07
ENSG00000259498	RP11-244F12.3	0.0312409	0.694447	0.0449867	-4.47436	1.1276e-11
ENSG00000133636	NTS	0.793692	17.6135	0.0450616	-4.47196	8.50228e-56
ENSG00000135697	BCO1	0.186179	4.09257	0.0454919	-4.45825	5.25531e-34
ENSG00000157005	SST	0.481656	10.558	0.0456202	-4.45418	2.27988e-19
ENSG00000175793	SFN	0.169097	3.6899	0.045827	-4.44766	4.69567e-16
ENSG00000204872	NAT8B	0.291775	6.36688	0.045827	-4.44766	4.69567e-16
ENSG00000251503	APITD1-CORT	0.0203659	0.440365	0.0462477	-4.43447	1.27658e-06
ENSG00000278971	RP11-644A7.2	0.0471931	1.02044	0.0462477	-4.43447	1.27658e-06
ENSG00000086548	CEACAM6	0.227502	4.91664	0.0462718	-4.43372	1.46209e-33
ENSG00000150893	FREM2	0.31191	6.72121	0.0464068	-4.42952	1.79477e-65
ENSG00000144063	MALL	0.909734	19.547	0.0465408	-4.42536	3.23407e-62
ENSG00000160867	FGFR4	0.190532	4.08953	0.0465903	-4.42383	2.07314e-49
ENSG00000103449	SALL1	0.0454032	0.96721	0.0469424	-4.41296	8.92203e-19
ENSG00000188993	LRRC66	0.894666	19.0455	0.0469752	-4.41196	2.57373e-57
ENSG00000163293	NIPAL1	0.187316	3.98132	0.0470487	-4.4097	2.09326e-44
ENSG00000205358	MT1H	0.204029	4.32615	0.0471618	-4.40624	1.50562e-15
ENSG00000170439	METTL7B	1.29461	27.4354	0.0471876	-4.40545	1.18258e-60
ENSG00000109158	GABRA4	0.0166697	0.346594	0.0480959	-4.37794	2.22605e-15
ENSG00000272414	FAM47E-STBD1	0.0290862	0.604756	0.0480959	-4.37794	2.22605e-15
ENSG00000156966	B3GNT7	0.996067	20.6258	0.0482922	-4.37207	7.81246e-62
ENSG00000151023	ENKUR	0.0184426	0.381489	0.0483436	-4.37053	6.52968e-11
ENSG00000128655	PDE11A	0.0445657	0.921853	0.0483436	-4.37053	2.19398e-32
ENSG00000169213	RAB3B	0.133255	2.74395	0.0485632	-4.36399	7.42648e-47
ENSG00000143632	ACTA1	0.138641	2.84644	0.048707	-4.35973	3.5509e-18
ENSG00000011347	SYT7	0.911554	18.7125	0.0487136	-4.35953	3.4217e-67
ENSG00000119547	ONECUT2	0.00449186	0.0915775	0.0490498	-4.34961	2.1476e-06
ENSG00000196620	UGT2B15	0.0223084	0.454811	0.0490498	-4.34961	2.1476e-06
ENSG00000258137	RP11-753H16.3	0.221877	4.52185	0.0490677	-4.34908	4.88551e-15
ENSG00000242048	RP13-452N2.1	0.173393	3.5334	0.0490724	-4.34894	3.49134e-26
ENSG00000159409	CELF3	0.0570673	1.15108	0.049577	-4.33418	2.73147e-23
ENSG00000282304	RP11-1223D19.3	2.82649	56.8579	0.0497115	-4.33028	1.73864e-59
ENSG00000178826	TMEM139	0.0631803	1.26789	0.0498312	-4.32681	3.64422e-23
ENSG00000224186	C5orf66	0.0197442	0.396219	0.0498314	-4.3268	1.58527e-10
ENSG00000269416	LINC01224	0.0211139	0.423706	0.0498314	-4.3268	1.58527e-10
ENSG00000064787	BCAS1	0.155482	3.09414	0.0502504	-4.31472	7.64668e-45
ENSG00000102554	KLF5	1.27753	25.376	0.050344	-4.31204	2.69948e-69
ENSG00000167105	TMEM92	0.506782	10.0661	0.0503453	-4.312	1.46947e-46
ENSG00000128591	FLNC	8.31253	164.788	0.0504438	-4.30918	6.07226e-80
ENSG00000011083	SLC6A7	0.19009	3.76517	0.0504864	-4.30796	9.82482e-36
ENSG00000181541	MAB21L2	1.93282	38.2415	0.0505425	-4.30636	5.16023e-63
ENSG00000156687	UNC5D	0.00400174	0.0791135	0.0505822	-4.30523	3.61809e-06
ENSG00000176884	GRIN1	0.00618051	0.122188	0.0505822	-4.30523	3.61809e-06
ENSG00000154975	CA10	0.00751959	0.148661	0.0505822	-4.30523	3.61809e-06
ENSG00000138622	HCN4	0.01029	0.203432	0.0505822	-4.30523	3.61809e-06
ENSG00000255282	WTAPP1	0.0171255	0.338569	0.0505822	-4.30523	3.61809e-06
ENSG00000233198	RNF224	0.0413661	0.8178	0.0505822	-4.30523	3.61809e-06
ENSG00000239539	HMGN1P20	0.247921	4.90135	0.0505822	-4.30523	3.61809e-06
ENSG00000115665	SLC5A7	0.0595358	1.1765	0.0506043	-4.3046	9.06547e-21
ENSG00000143365	RORC	0.19422	3.83769	0.0506085	-4.30448	3.45389e-44
ENSG00000204128	C2orf72	0.0717157	1.40449	0.0510619	-4.29161	2.94916e-25
ENSG00000152954	NRSN1	0.0208506	0.405552	0.0514129	-4.28173	3.87113e-10
ENSG00000006128	TAC1	0.0836368	1.62677	0.0514129	-4.28173	2.91156e-17
ENSG00000100889	PCK2	1.0766	20.8498	0.0516359	-4.27548	1.02135e-70
ENSG00000188869	TMC3	0.0142894	0.273665	0.0522149	-4.25939	6.10365e-06
ENSG00000145248	SLC10A4	0.041551	0.795768	0.0522149	-4.25939	6.10365e-06
ENSG00000233214	AC002511.2	0.165281	3.16539	0.0522149	-4.25939	6.10365e-06
ENSG00000268729	CTD-2105E13.14	0.207176	3.96776	0.0522149	-4.25939	6.10365e-06
ENSG00000108825	PTGES3L-AARSD1	0.131699	2.52113	0.0522383	-4.25875	8.71102e-25
ENSG00000187714	SLC18A3	0.0615007	1.17721	0.0522427	-4.25863	6.06227e-10
ENSG00000166825	ANPEP	14.1357	269.771	0.0523988	-4.25432	1.77597e-78
ENSG00000155052	CNTNAP5	0.0395759	0.749528	0.0528011	-4.24329	5.3333e-14
ENSG00000125775	SDCBP2	0.725429	13.733	0.0528238	-4.24267	1.1391e-52
ENSG00000267645	RP11-577H5.5	0.512224	9.69022	0.0528599	-4.24168	2.6325e-31
ENSG00000196139	AKR1C3	0.272199	5.14052	0.0529517	-4.23918	5.99562e-45
ENSG00000233670	PIRT	0.175775	3.30451	0.0531925	-4.23263	4.39298e-28
ENSG00000130762	ARHGEF16	0.568454	10.679	0.0532309	-4.23159	4.50881e-57
ENSG00000134612	FOLH1B	0.309851	5.81942	0.0532442	-4.23123	8.28437e-33
ENSG00000113645	WWC1	0.121323	2.2763	0.0532983	-4.22977	7.36859e-46
ENSG00000163686	ABHD6	1.3217	24.5635	0.0538077	-4.21604	7.84442e-65
ENSG00000132692	BCAN	0.00915062	0.169597	0.053955	-4.2121	1.03095e-05
ENSG00000213561	RP11-386I14.2	0.0970969	1.79959	0.053955	-4.2121	1.03095e-05
ENSG00000196353	CPNE4	0.0211199	0.391227	0.0539837	-4.21133	1.73238e-16
ENSG00000198729	PPP1R14C	0.0691597	1.28112	0.0539837	-4.21133	9.50705e-10
ENSG00000196993	NPIPB9	0.140209	2.59725	0.0539837	-4.21133	1.73238e-16
ENSG00000171243	SOSTDC1	0.0695475	1.28831	0.0539837	-4.21133	1.73238e-16
ENSG00000184731	FAM110C	0.217818	4.03487	0.0539838	-4.21133	8.50005e-35
ENSG00000178078	STAP2	0.400454	7.33885	0.0545663	-4.19585	1.51411e-46
ENSG00000119514	GALNT12	0.498222	9.11958	0.0546321	-4.19411	1.51411e-46
ENSG00000046604	DSG2	1.43414	26.1528	0.0548369	-4.18871	5.83464e-66
ENSG00000130226	DPP6	0.0377829	0.684383	0.0552073	-4.179	2.97179e-27
ENSG00000101213	PTK6	0.065913	1.19046	0.0553679	-4.17481	5.11821e-16
ENSG00000130988	RGN	0.886633	15.9724	0.0555102	-4.1711	3.52319e-59
ENSG00000196878	LAMB3	0.490819	8.79664	0.0557962	-4.16369	7.63995e-52
ENSG00000166840	GLYATL1	0.00598794	0.107282	0.0558149	-4.16321	1.7433e-05
ENSG00000164588	HCN1	0.00508625	0.0911271	0.0558149	-4.16321	1.7433e-05
ENSG00000117595	IRF6	0.410978	7.33788	0.0560077	-4.15823	8.0192e-54
ENSG00000137757	CASP5	0.420428	7.43573	0.0565417	-4.14454	4.12991e-34
ENSG00000135549	PKIB	0.121462	2.13123	0.0569916	-4.13311	5.64681e-31
ENSG00000100197	CYP2D6	0.676637	11.8489	0.0571053	-4.13023	3.80291e-50
ENSG00000204147	ASAH2B	0.566601	9.85465	0.0574958	-4.1204	8.01787e-49
ENSG00000112782	CLIC5	1.1801	20.4938	0.0575834	-4.1182	1.3265e-67
ENSG00000162482	AKR7A3	0.95735	16.5794	0.0577432	-4.11421	1.41689e-40
ENSG00000256262	USP30-AS1	0.113378	1.96124	0.0578097	-4.11255	2.95077e-05
ENSG00000179761	PIPOX	0.540984	9.25671	0.0584423	-4.09684	2.93912e-49
ENSG00000114805	PLCH1	0.211561	3.61866	0.0584641	-4.09631	3.19323e-45
ENSG00000211454	AKR7L	0.334483	5.71787	0.0584978	-4.09547	6.87718e-38
ENSG00000106789	CORO2A	1.58797	27.0135	0.0587842	-4.08843	3.85232e-63
ENSG00000078725	BRINP1	0.0318016	0.540001	0.0588918	-4.08579	9.20433e-09
ENSG00000055118	KCNH2	0.262491	4.45531	0.0589164	-4.08519	4.38748e-49
ENSG00000124664	SPDEF	0.161756	2.737	0.0590999	-4.0807	6.61053e-18
ENSG00000260108	RP11-140H17.1	0.153672	2.58123	0.0595344	-4.07013	9.28671e-18
ENSG00000213962	API5P2	0.0496504	0.828194	0.0599502	-4.06009	4.99871e-05
ENSG00000276934	RP11-231E4.5	0.153988	2.5686	0.0599502	-4.06009	4.99871e-05
ENSG00000146521	LINC01558	0.0833487	1.38981	0.0599714	-4.05958	2.10719e-12
ENSG00000185000	DGAT1	4.9452	82.3482	0.0600522	-4.05764	3.66249e-70
ENSG00000204323	SMIM5	1.02216	16.9646	0.0602526	-4.05283	2.342e-59
ENSG00000168350	DEGS2	0.185609	3.06985	0.0604618	-4.04783	2.59366e-32
ENSG00000173531	MST1	0.359049	5.87269	0.0611388	-4.03177	4.95047e-58
ENSG00000142675	CNKSR1	0.201482	3.28803	0.0612773	-4.0285	2.03651e-38
ENSG00000233930	KRTAP5-AS1	0.0988678	1.61183	0.0613388	-4.02706	2.59042e-17
ENSG00000180875	GREM2	1.19562	19.3054	0.0619319	-4.01317	4.2633e-55
ENSG00000230650	AC112229.1	0.213963	3.44988	0.0620202	-4.01112	1.46992e-24
ENSG00000096696	DSP	1.74483	28.106	0.0620802	-4.00972	5.34974e-68
ENSG00000088926	F11	0.0152755	0.245368	0.0622553	-4.00566	8.47349e-05
ENSG00000243373	RN7SL173P	0.254713	4.09143	0.0622553	-4.00566	8.47349e-05
ENSG00000103375	AQP8	0.0779223	1.25097	0.0622895	-4.00487	2.30315e-08
ENSG00000171714	ANO5	0.278539	4.45868	0.0624712	-4.00066	6.42462e-41
ENSG00000185133	INPP5J	0.262394	4.19748	0.0625123	-3.99972	2.48786e-44
ENSG00000275688	CCL15-CCL14	0.25183	4.00407	0.0628935	-3.99094	4.31381e-14
ENSG00000229953	RP11-284F21.7	0.785391	12.4876	0.0628938	-3.99094	4.73192e-23
ENSG00000106089	STX1A	0.288343	4.57841	0.0629787	-3.98899	5.04826e-42
ENSG00000181195	PENK	0.134384	2.12736	0.0631694	-3.98463	1.5022e-27
ENSG00000171227	TMEM37	1.18704	18.7331	0.0633661	-3.98015	4.76091e-53
ENSG00000169218	RSPO1	0.0522766	0.823118	0.0635105	-3.97686	4.31381e-14
ENSG00000235721	AC013268.3	0.320206	5.02203	0.0637603	-3.9712	1.10155e-25
ENSG00000196549	MME	2.57537	39.8776	0.064582	-3.95272	3.6463e-68
ENSG00000174939	ASPHD1	0.0171849	0.265416	0.0647472	-3.94904	8.47349e-05
ENSG00000179546	HTR1D	0.026235	0.405192	0.0647472	-3.94904	8.47349e-05
ENSG00000145198	VWA5B2	0.0381375	0.58872	0.0647804	-3.9483	9.17659e-14
ENSG00000180316	PNPLA1	0.0449914	0.694522	0.0647804	-3.9483	1.13881e-08
ENSG00000256028	RP11-197N18.2	0.0529838	0.8179	0.0647804	-3.9483	9.17659e-14
ENSG00000184860	SDR42E1	0.273059	4.2082	0.0648872	-3.94592	3.57201e-49
ENSG00000188112	C6orf132	0.574288	8.82609	0.0650672	-3.94193	1.90493e-50
ENSG00000273036	FAM95C	0.127243	1.95111	0.0652154	-3.93864	5.22698e-18
ENSG00000165023	DIRAS2	0.0848437	1.29937	0.065296	-3.93686	2.94037e-16
ENSG00000168060	NAALADL1	0.271757	4.15418	0.0654178	-3.93417	8.469e-48
ENSG00000129167	TPH1	0.445381	6.80305	0.0654678	-3.93307	1.46066e-45
ENSG00000162552	WNT4	0.0492189	0.749782	0.0656443	-3.92919	2.59705e-11
ENSG00000176406	RIMS2	0.0344073	0.524085	0.0656521	-3.92902	2.53149e-23
ENSG00000075461	CACNG4	0.176132	2.67813	0.0657669	-3.92649	4.39348e-22
ENSG00000174028	FAM3C2	19.4502	295.602	0.0657988	-3.92579	5.33205e-62
ENSG00000091262	ABCC6	0.601863	9.12095	0.0659869	-3.92168	3.91087e-55
ENSG00000148483	TMEM236	1.13037	17.1302	0.0659869	-3.92168	3.91087e-55
ENSG00000136883	KIF12	0.352197	5.25586	0.0670103	-3.89947	1.52671e-33
ENSG00000143674	RP5-862P8.2	0.1214	1.81166	0.0670103	-3.89947	1.52671e-33
ENSG00000133392	MYH11	27.5881	410.813	0.0671547	-3.89637	3.04499e-69
ENSG00000174885	NLRP6	2.73926	40.6561	0.0673764	-3.89161	2.53793e-59
ENSG00000204961	PCDHA9	0.00563755	0.0835884	0.0674442	-3.89016	0.000143701
ENSG00000234667	ACTBP13	0.0160501	0.237976	0.0674442	-3.89016	0.000143701
ENSG00000272235	RP11-22L13.1	0.0214898	0.318631	0.0674442	-3.89016	0.000143701
ENSG00000281406	BLACAT1	0.0248418	0.368331	0.0674442	-3.89016	0.000143701
ENSG00000112812	PRSS16	0.00999071	0.148054	0.0674801	-3.88939	2.97612e-08
ENSG00000143153	ATP1B1	4.35623	64.5058	0.0675324	-3.88828	2.91781e-63
ENSG00000085563	ABCB1	1.11492	16.4949	0.0675919	-3.887	1.15813e-59
ENSG00000185101	ANO9	0.93258	13.7284	0.0679307	-3.87979	1.20198e-59
ENSG00000268388	FENDRR	0.610904	8.95593	0.0682122	-3.87383	9.52337e-55
ENSG00000023839	ABCC2	1.34208	19.4852	0.068877	-3.85983	1.98589e-57
ENSG00000088002	SULT2B1	0.0416312	0.604091	0.0689154	-3.85903	2.97612e-08
ENSG00000240731	RP5-890O3.9	0.385574	5.59489	0.0689154	-3.85903	2.97612e-08
ENSG00000177106	EPS8L2	0.766448	11.0948	0.0690816	-3.85556	1.13524e-60
ENSG00000128965	CHAC1	0.104279	1.50509	0.0692839	-3.85134	4.26996e-21
ENSG00000116329	OPRD1	0.0229096	0.330132	0.0693953	-3.84902	1.42268e-10
ENSG00000256802	RP11-680F8.1	0.075921	1.09404	0.0693953	-3.84902	1.42268e-10
ENSG00000113805	CNTN3	0.111505	1.60078	0.0696566	-3.8436	5.69245e-21
ENSG00000186715	MST1L	0.315154	4.51121	0.0698602	-3.83939	2.17997e-41
ENSG00000089356	FXYD3	0.146194	2.09019	0.0699428	-3.83768	2.24854e-27
ENSG00000160180	TFF3	0.651549	9.29578	0.0700908	-3.83463	7.85684e-33
ENSG00000054690	PLEKHH1	0.229239	3.26947	0.0701152	-3.83413	1.29288e-51
ENSG00000174808	BTC	0.525881	7.48358	0.0702713	-3.83092	2.38126e-35
ENSG00000262160	RP11-96D1.11	0.0234108	0.332655	0.0703757	-3.82878	0.000243751
ENSG00000113494	PRLR	0.53095	7.53075	0.0705042	-3.82615	3.5685e-57
ENSG00000243989	ACY1	1.09476	15.3958	0.0711077	-3.81385	6.27891e-51
ENSG00000163814	CDCP1	0.937488	13.1829	0.0711137	-3.81373	4.04205e-53
ENSG00000261488	RP11-757F18.5	0.268906	3.77179	0.071294	-3.81007	1.30181e-18
ENSG00000173406	DAB1	0.513741	7.19436	0.0714089	-3.80775	1.5848e-52
ENSG00000121898	CPXM2	2.04591	28.5787	0.0715884	-3.80413	4.63206e-58
ENSG00000134042	MRO	0.192711	2.68872	0.0716739	-3.80241	3.55552e-42
ENSG00000198794	SCAMP5	0.214663	2.99322	0.0717163	-3.80156	2.32077e-44
ENSG00000076864	RAP1GAP	0.202738	2.82159	0.0718525	-3.79882	3.47316e-37
ENSG00000025423	HSD17B6	0.029217	0.405911	0.071979	-3.79628	7.82344e-08
ENSG00000148798	INA	0.11784	1.62988	0.0722996	-3.78987	5.88336e-23
ENSG00000008323	PLEKHG6	0.764351	10.5434	0.0724955	-3.78596	1.00124e-48
ENSG00000205089	CCNI2	0.0886254	1.22216	0.0725155	-3.78557	6.12668e-17
ENSG00000159640	ACE	2.40059	32.8045	0.0731787	-3.77243	6.6829e-63
ENSG00000156920	ADGRG4	0.291286	3.97901	0.0732056	-3.7719	6.36716e-43
ENSG00000186472	PCLO	0.19757	2.69838	0.073218	-3.77166	1.1131e-50
ENSG00000197249	SERPINA1	6.30975	86.1053	0.0732794	-3.77045	3.71253e-65
ENSG00000251533	LINC00605	0.0477383	0.64885	0.0735737	-3.76467	0.00041343
ENSG00000254690	GS1-393G12.12	0.167514	2.27682	0.0735737	-3.76467	0.00041343
ENSG00000224698	RP11-131J3.1	0.0299783	0.40746	0.0735737	-3.76467	0.00041343
ENSG00000248543	NPM1P41	0.0895021	1.2165	0.0735737	-3.76467	0.00041343
ENSG00000259823	LYPD8	0.0665318	0.903788	0.0736144	-3.76387	1.27111e-07
ENSG00000065154	OAT	8.54865	116.096	0.0736343	-3.76348	3.71611e-63
ENSG00000105707	HPN	0.278217	3.76112	0.0739716	-3.75688	3.20857e-37
ENSG00000142606	MMEL1	0.227728	3.07709	0.0740076	-3.75618	6.47332e-30
ENSG00000176928	GCNT4	1.16564	15.7274	0.0741154	-3.75408	9.47259e-52
ENSG00000114529	C3orf52	0.136702	1.83836	0.0743609	-3.74931	8.84697e-31
ENSG00000232040	ZBED9	0.0473684	0.636157	0.0744603	-3.74738	1.39688e-12
ENSG00000163975	MFI2	2.89821	38.6039	0.0750756	-3.73551	5.49333e-61
ENSG00000172771	EFCAB12	0.065026	0.865542	0.0751275	-3.73451	1.64305e-20
ENSG00000121211	MND1	0.0672533	0.892832	0.0753259	-3.73071	2.068e-07
ENSG00000184925	LCN12	0.28959	3.82975	0.0756159	-3.72517	2.33505e-34
ENSG00000119431	HDHD3	1.06881	14.021	0.0762296	-3.71351	7.57969e-43
ENSG00000007062	PROM1	0.138561	1.81652	0.0762783	-3.71258	1.96673e-35
ENSG00000013293	SLC7A14	0.091468	1.19479	0.0765556	-3.70735	3.00627e-25
ENSG00000185015	CA13	0.548444	7.14786	0.0767283	-3.7041	2.39504e-43
ENSG00000185053	SGCZ	0.0207234	0.268857	0.0770795	-3.69751	0.000700954
ENSG00000259985	RP11-549B18.1	0.0636238	0.825431	0.0770795	-3.69751	0.000700954
ENSG00000225206	MIR137HG	0.0216728	0.281079	0.0771057	-3.69702	1.89442e-09
ENSG00000260586	RP11-592N21.2	0.533008	6.91216	0.0771116	-3.69691	9.17917e-14
ENSG00000145721	LIX1	0.0677894	0.879016	0.0771197	-3.69676	4.65269e-12
ENSG00000166920	C15orf48	0.259176	3.36069	0.0771197	-3.69676	6.27412e-19
ENSG00000261618	RP11-79H23.3	0.34797	4.48138	0.0776479	-3.68691	4.49575e-26
ENSG00000171916	LGALS9C	0.0732499	0.942282	0.0777367	-3.68526	3.32006e-24
ENSG00000236333	TRHDE-AS1	0.391449	5.02926	0.0778344	-3.68345	2.44536e-46
ENSG00000162415	ZSWIM5	0.23969	3.06379	0.0782332	-3.67607	8.6806e-31
ENSG00000121207	LRAT	0.0191086	0.243887	0.0783502	-3.67392	2.92884e-09
ENSG00000261068	RP11-7K24.3	0.110117	1.40545	0.0783502	-3.67392	2.92884e-09
ENSG00000204588	LINC01123	1.26473	16.1267	0.0784247	-3.67255	7.61696e-49
ENSG00000198848	CES1	0.313426	3.98369	0.0786773	-3.66791	3.05092e-33
ENSG00000227070	RP11-191G24.1	0.241218	3.05336	0.079001	-3.66199	5.49458e-07
ENSG00000106772	PRUNE2	1.16169	14.6685	0.0791961	-3.65843	4.97892e-60
ENSG00000128165	ADM2	0.448559	5.6637	0.079199	-3.65837	7.97014e-36
ENSG00000137960	GIPC2	1.62949	20.5518	0.0792872	-3.65677	2.02786e-49
ENSG00000146352	CLVS2	0.0180926	0.227196	0.0796343	-3.65047	4.53328e-09
ENSG00000244004	RP11-1396O13.2	0.286164	3.59348	0.0796343	-3.65047	4.53328e-09
ENSG00000162366	PDZK1IP1	0.095388	1.19783	0.0796343	-3.65047	4.53328e-09
ENSG00000165548	TMEM63C	0.261627	3.28077	0.0797455	-3.64845	3.49367e-34
ENSG00000163399	ATP1A1	17.338	217.214	0.0798197	-3.64711	2.52396e-62
ENSG00000146205	ANO7	0.156684	1.96108	0.0798968	-3.64572	4.04263e-34
ENSG00000148346	LCN2	0.692338	8.57959	0.0806959	-3.63136	2.66817e-35
ENSG00000197822	OCLN	0.512397	6.34589	0.0807447	-3.63049	2.68463e-43
ENSG00000167767	KRT80	0.00804676	0.0994257	0.0809324	-3.62714	0.00118753
ENSG00000105278	ZFR2	0.00929122	0.114802	0.0809324	-3.62714	0.00118753
ENSG00000143217	PVRL4	0.0173371	0.214217	0.0809324	-3.62714	0.00118753
ENSG00000267651	RP11-95O2.1	0.0350171	0.43267	0.0809324	-3.62714	0.00118753
ENSG00000066032	CTNNA2	0.0333828	0.412258	0.0809755	-3.62637	3.72642e-15
ENSG00000148408	CACNA1B	0.0493965	0.606966	0.0813827	-3.61913	1.53602e-20
ENSG00000104369	JPH1	0.0749023	0.915841	0.0817853	-3.61202	5.83536e-13
ENSG00000164695	CHMP4C	0.757696	9.25885	0.0818348	-3.61114	2.99064e-29
ENSG00000146267	FAXC	0.0991271	1.21063	0.0818806	-3.61033	2.41352e-28
ENSG00000104435	STMN2	1.30258	15.8984	0.0819316	-3.60944	2.92375e-41
ENSG00000173825	TIGD3	0.110938	1.34743	0.082333	-3.60239	7.02447e-09
ENSG00000130055	GDPD2	0.09336	1.13	0.0826196	-3.59737	8.47353e-13
ENSG00000178171	AMER3	0.0140354	0.168997	0.0830512	-3.58986	8.97212e-07
ENSG00000157765	SLC34A2	0.0229289	0.276082	0.0830512	-3.58986	8.97212e-07
ENSG00000124134	KCNS1	0.0267635	0.322253	0.0830512	-3.58986	8.97212e-07
ENSG00000248874	C5orf17	0.0618328	0.744515	0.0830512	-3.58986	8.97212e-07
ENSG00000234618	RPSAP9	0.167603	2.01807	0.0830512	-3.58986	8.97212e-07
ENSG00000177511	ST8SIA3	0.0347359	0.418243	0.0830518	-3.58984	1.06362e-14
ENSG00000116661	FBXO2	0.437592	5.26193	0.0831619	-3.58793	7.58075e-29
ENSG00000139835	GRTP1	0.539	6.4648	0.0833745	-3.58425	4.49453e-36
ENSG00000156222	SLC28A1	0.206138	2.46931	0.08348	-3.58243	6.02088e-20
ENSG00000206341	HLA-H	3.32688	39.5769	0.084061	-3.57242	3.93493e-41
ENSG00000137273	FOXF2	0.850643	10.0849	0.0843478	-3.56751	5.2925e-32
ENSG00000079841	RIMS1	0.0768134	0.910227	0.0843894	-3.5668	1.45086e-29
ENSG00000223813	AC007255.8	0.229965	2.71843	0.0845949	-3.56328	1.03584e-15
ENSG00000182256	GABRG3	0.00531411	0.0623789	0.0851908	-3.55316	0.00200946
ENSG00000149972	CNTN5	0.00617281	0.0724587	0.0851908	-3.55316	0.00200946
ENSG00000261502	RP11-96H17.1	0.0141346	0.165917	0.0851908	-3.55316	0.00200946
ENSG00000183150	GPR19	0.0151819	0.178211	0.0851908	-3.55316	0.00200946
ENSG00000016082	ISL1	0.0232426	0.27283	0.0851908	-3.55316	0.00200946
ENSG00000039139	DNAH5	0.00866257	0.101628	0.0852382	-3.55236	1.46665e-06
ENSG00000204860	FAM201A	0.0250769	0.294198	0.0852382	-3.55236	1.46665e-06
ENSG00000107518	ATRNL1	0.149423	1.74955	0.0854069	-3.5495	2.61728e-32
ENSG00000213160	KLHL23	0.559424	6.54549	0.0854671	-3.54849	1.47271e-42
ENSG00000101276	SLC52A3	0.291551	3.38597	0.0861055	-3.53775	4.13235e-32
ENSG00000070729	CNGB1	0.0403207	0.46811	0.0861351	-3.53725	2.61045e-12
ENSG00000119411	BSPRY	0.288657	3.33304	0.0866048	-3.52941	2.39877e-19
ENSG00000272068	RP11-284F21.9	0.115468	1.32629	0.0870611	-3.52183	3.80607e-12
ENSG00000196639	HRH1	0.0639146	0.734054	0.0870708	-3.52167	3.16891e-19
ENSG00000137880	GCHFR	0.453744	5.18942	0.0874364	-3.51562	3.70747e-30
ENSG00000223823	LINC01342	0.0918714	1.04946	0.0875413	-3.51389	2.39989e-06
ENSG00000036828	CASR	0.0197076	0.225123	0.0875413	-3.51389	2.39989e-06
ENSG00000278071	RP11-736N17.10	0.191546	2.18807	0.0875413	-3.51389	2.39989e-06
ENSG00000049759	NEDD4L	0.528395	6.00236	0.0880313	-3.50584	7.46753e-53
ENSG00000134339	SAA2	0.0734962	0.832139	0.088322	-3.50108	4.09254e-08
ENSG00000010030	ETV7	0.170235	1.92721	0.0883319	-3.50092	4.37442e-18
ENSG00000249201	CTD-3080P12.3	0.449437	5.06145	0.0887961	-3.49336	2.50047e-28
ENSG00000181350	LRRC75A	0.841547	9.46401	0.0889208	-3.49134	1.20576e-44
ENSG00000106025	TSPAN12	0.60105	6.75302	0.0890046	-3.48998	6.50976e-37
ENSG00000178623	GPR35	0.434953	4.88367	0.0890626	-3.48904	1.71877e-41
ENSG00000132207	SLX1A	0.099177	1.1125	0.0891479	-3.48766	1.27161e-13
ENSG00000184163	FAM132A	0.194286	2.17284	0.0894154	-3.48333	7.94991e-18
ENSG00000248485	PCP4L1	1.56769	17.4892	0.0896378	-3.47975	7.30837e-33
ENSG00000229367	HMGN2P19	0.280665	3.12104	0.0899268	-3.47511	0.00200946
ENSG00000204110	RP1-153P14.8	0.138503	1.54018	0.0899268	-3.47511	0.00200946
ENSG00000183844	FAM3B	0.0364694	0.40534	0.0899723	-3.47438	3.93054e-06
ENSG00000089169	RPH3A	0.0152867	0.169903	0.0899735	-3.47436	2.77347e-10
ENSG00000132938	MTUS2	0.0195343	0.217112	0.0899735	-3.47436	2.77347e-10
ENSG00000147883	CDKN2B	0.458793	5.08364	0.0902489	-3.46995	3.67895e-35
ENSG00000115221	ITGB6	0.0902147	0.992242	0.09092	-3.45926	1.77029e-24
ENSG00000109265	KIAA1211	1.5837	17.3501	0.0912788	-3.45358	2.42387e-49
ENSG00000203697	CAPN8	0.282308	3.08611	0.091477	-3.45045	5.01062e-31
ENSG00000182472	CAPN12	0.16494	1.80066	0.0915994	-3.44852	8.50672e-30
ENSG00000103056	SMPD3	1.15407	12.5637	0.0918571	-3.44447	1.53417e-50
ENSG00000175164	ABO	1.22292	13.2992	0.0919545	-3.44294	2.74121e-48
ENSG00000160183	TMPRSS3	0.0398318	0.430412	0.0925434	-3.43373	6.36816e-10
ENSG00000133169	BEX1	0.344518	3.72277	0.0925434	-3.43373	6.36816e-10
ENSG00000143318	CASQ1	0.326109	3.51486	0.0927802	-3.43004	2.74748e-19
ENSG00000108187	PBLD	1.37626	14.8247	0.0928356	-3.42918	3.28301e-48
ENSG00000149328	GLB1L2	0.0536151	0.577028	0.092916	-3.42793	1.0652e-14
ENSG00000227959	RP11-276H7.2	0.246911	2.64309	0.0934177	-3.42016	9.93572e-08
ENSG00000172752	COL6A5	0.0998835	1.06907	0.0934303	-3.41997	6.32987e-23
ENSG00000089472	HEPH	2.42265	25.8237	0.0938152	-3.41403	3.78057e-53
ENSG00000109193	SULT1E1	1.59272	16.961	0.0939047	-3.41266	4.71459e-40
ENSG00000126368	NR1D1	0.671124	7.09465	0.0945958	-3.40208	6.09082e-29
ENSG00000145247	OCIAD2	0.271349	2.86815	0.0946077	-3.4019	5.50781e-24
ENSG00000162545	CAMK2N1	2.41111	25.4707	0.094662	-3.40107	6.3215e-45
ENSG00000230445	LRRC37A6P	0.00755012	0.0792954	0.0952151	-3.39267	0.00339444
ENSG00000226869	LHFPL3-AS1	0.0163357	0.171566	0.0952151	-3.39267	0.00339444
ENSG00000144550	CPNE9	0.0226688	0.238079	0.0952151	-3.39267	0.00339444
ENSG00000279943	FLJ38576	0.0302465	0.317665	0.0952151	-3.39267	0.00339444
ENSG00000180673	EXOC5P1	0.0377736	0.396719	0.0952151	-3.39267	0.00339444
ENSG00000254740	RP11-334E6.3	0.0753559	0.791427	0.0952151	-3.39267	0.00339444
ENSG00000250734	RP11-404E16.1	0.139021	1.46007	0.0952151	-3.39267	0.00339444
ENSG00000274849	RP11-49I11.4	0.165649	1.73973	0.0952151	-3.39267	0.00339444
ENSG00000066813	ACSM2B	0.0250785	0.263276	0.0952557	-3.39205	5.48047e-11
ENSG00000170927	PKHD1	0.0168829	0.177219	0.0952658	-3.3919	1.46845e-09
ENSG00000165105	RASEF	0.354779	3.71802	0.0954215	-3.38954	3.62889e-33
ENSG00000124171	PARD6B	0.514867	5.39537	0.0954276	-3.38945	1.11978e-32
ENSG00000183723	CMTM4	0.683312	7.13495	0.0957698	-3.38429	3.13787e-45
ENSG00000006453	BAIAP2L1	1.24023	12.9416	0.0958327	-3.38334	3.54822e-43
ENSG00000229619	MBNL1-AS1	2.31622	24.108	0.0960767	-3.37967	4.70038e-50
ENSG00000136153	LMO7	0.667567	6.94381	0.0961385	-3.37874	1.92489e-49
ENSG00000154914	USP43	0.0892454	0.927623	0.0962088	-3.37769	1.06793e-19
ENSG00000116745	RPE65	0.114047	1.17955	0.0966873	-3.37053	1.46845e-09
ENSG00000007171	NOS2	0.130583	1.35057	0.0966873	-3.37053	3.80111e-15
ENSG00000162374	ELAVL4	0.0695231	0.716369	0.0970493	-3.36514	4.96778e-23
ENSG00000236499	LINC00896	0.0816117	0.840029	0.0971534	-3.36359	2.42031e-07
ENSG00000178233	TMEM151B	0.0665069	0.68177	0.0975503	-3.35771	1.18443e-10
ENSG00000159212	CLIC6	0.481957	4.94017	0.0975589	-3.35758	3.82133e-28
ENSG00000073350	LLGL2	0.694334	7.11295	0.0976154	-3.35675	2.19088e-45
ENSG00000143367	TUFT1	0.546531	5.59463	0.0976884	-3.35567	1.39285e-35
ENSG00000130513	GDF15	0.15089	1.54408	0.0977214	-3.35518	5.94752e-14
ENSG00000100079	LGALS2	2.93095	29.8622	0.0981494	-3.34888	8.34811e-33
ENSG00000015592	STMN4	0.0461279	0.469965	0.0981518	-3.34884	2.23333e-09
ENSG00000236423	LINC01134	0.0535269	0.545348	0.0981518	-3.34884	2.23333e-09
ENSG00000279673	RP11-185E8.2	0.0904751	0.921788	0.0981518	-3.34884	1.73427e-05
ENSG00000187808	SOWAHD	0.0958967	0.977024	0.0981518	-3.34884	1.73427e-05
ENSG00000262294	RP11-1260E13.2	0.198973	2.02719	0.0981518	-3.34884	1.73427e-05
ENSG00000175318	GRAMD2	0.0619744	0.63141	0.0981525	-3.34883	7.25243e-15
ENSG00000135333	EPHA7	0.522171	5.31196	0.0983011	-3.34665	1.97786e-38
ENSG00000175772	LINC01106	0.460426	4.67632	0.0984592	-3.34433	9.23939e-30
ENSG00000168772	CXXC4	0.254675	2.57191	0.0990218	-3.33611	1.13115e-30
ENSG00000175426	PCSK1	0.37873	3.81968	0.0991522	-3.33421	3.70834e-31
ENSG00000151729	SLC25A4	1.31108	13.2149	0.0992126	-3.33333	5.12279e-43
ENSG00000075043	KCNQ2	0.0247692	0.249096	0.0994362	-3.33009	8.41187e-14
ENSG00000186487	MYT1L	0.0151629	0.152142	0.0996628	-3.3268	3.40004e-09
ENSG00000168502	MTCL1	0.452297	4.53525	0.0997293	-3.32584	1.19875e-43
ENSG00000272851	RP11-801F7.1	0.791658	7.90267	0.100176	-3.31939	4.77626e-12
ENSG00000168824	NSG1	0.0552456	0.550062	0.100435	-3.31566	1.92285e-14
ENSG00000143850	PLEKHA6	1.54169	15.3259	0.100594	-3.31339	1.12563e-47
ENSG00000282393	CTD-3113P16.11	0.0246197	0.243364	0.101164	-3.30523	0.00572059
ENSG00000268533	AC004076.7	0.142757	1.41114	0.101164	-3.30523	0.00572059
ENSG00000100314	CABP7	0.0684897	0.676761	0.101202	-3.30469	5.91305e-07
ENSG00000185761	ADAMTSL5	0.180907	1.78734	0.101216	-3.30449	3.39299e-21
ENSG00000131941	RHPN2	0.382371	3.77775	0.101216	-3.30448	6.75764e-32
ENSG00000270332	SMC2-AS1	0.0193489	0.19116	0.101218	-3.30446	1.73427e-05
ENSG00000223387	RP11-408H1.3	0.0373761	0.369263	0.101218	-3.30446	1.73427e-05
ENSG00000127074	RGS13	0.0382945	0.378331	0.10122	-3.30444	5.18131e-09
ENSG00000119121	TRPM6	0.872796	8.58455	0.101671	-3.29803	2.36333e-43
ENSG00000155980	KIF5A	0.405321	3.97887	0.101868	-3.29522	1.45155e-32
ENSG00000047597	XK	0.614629	6.01068	0.102256	-3.28974	1.4714e-33
ENSG00000174607	UGT8	1.00279	9.78623	0.102469	-3.28674	1.96849e-41
ENSG00000260196	RP1-239B22.5	0.258119	2.51822	0.102501	-3.28629	9.30985e-17
ENSG00000267629	AC138430.4	0.165093	1.60555	0.102826	-3.28172	2.04189e-18
ENSG00000139508	SLC46A3	2.21948	21.5817	0.102841	-3.28151	2.53904e-46
ENSG00000188766	SPRED3	0.263276	2.55469	0.103056	-3.2785	1.94693e-28
ENSG00000130176	CNN1	6.7709	65.6382	0.103155	-3.27712	7.06413e-51
ENSG00000065534	MYLK	4.46721	43.277	0.103224	-3.27615	8.41264e-53
ENSG00000267892	CTD-2540F13.2	0.141271	1.36685	0.103355	-3.27432	9.25093e-07
ENSG00000161653	NAGS	0.430514	4.16142	0.103454	-3.27294	2.67723e-27
ENSG00000112276	BVES	0.865526	8.36183	0.103509	-3.27217	1.41073e-39
ENSG00000171903	CYP4F11	0.0711517	0.686468	0.103649	-3.27022	5.13475e-14
ENSG00000164796	CSMD3	0.0146322	0.14096	0.103804	-3.26806	5.5925e-10
ENSG00000171435	KSR2	0.0204028	0.195983	0.104105	-3.26389	2.69319e-15
ENSG00000241484	ARHGAP8	0.234006	2.24312	0.104322	-3.26089	2.05587e-24
ENSG00000197506	SLC28A3	0.25664	2.45639	0.104479	-3.25872	1.361e-22
ENSG00000180720	CHRM4	0.196998	1.88541	0.104485	-3.25863	1.20663e-08
ENSG00000163701	IL17RE	0.319972	3.05045	0.104893	-3.25301	1.75987e-32
ENSG00000174292	TNK1	0.152202	1.44997	0.104969	-3.25197	1.49683e-19
ENSG00000159208	CIART	0.0705288	0.670733	0.105152	-3.24945	8.26172e-10
ENSG00000249962	RP11-80H5.5	0.599097	5.69745	0.105152	-3.24945	8.26172e-10
ENSG00000080644	CHRNA3	0.382148	3.61819	0.105619	-3.24306	1.68538e-29
ENSG00000162817	C1orf115	6.7371	63.7477	0.105684	-3.24217	6.7769e-48
ENSG00000196611	MMP1	0.491049	4.64159	0.105793	-3.24068	5.82071e-19
ENSG00000178343	SHISA3	0.981599	9.20856	0.106596	-3.22977	1.47057e-26
ENSG00000111802	TDP2	5.15276	48.3104	0.106659	-3.22892	2.5563e-48
ENSG00000183873	SCN5A	0.0477713	0.446147	0.107075	-3.2233	6.27648e-21
ENSG00000196104	SPOCK3	0.0549684	0.512229	0.107312	-3.22011	1.28976e-16
ENSG00000169436	COL22A1	0.223175	2.07698	0.107452	-3.21824	2.22676e-27
ENSG00000136828	RALGPS1	0.854654	7.95216	0.107475	-3.21793	1.9488e-45
ENSG00000073605	GSDMB	1.48511	13.7645	0.107894	-3.21231	2.04967e-45
ENSG00000092054	MYH7	0.0122189	0.113229	0.107913	-3.21206	0.00961124
ENSG00000134548	SPX	0.012394	0.114851	0.107913	-3.21206	0.00961124
ENSG00000260714	RP11-266L9.1	0.0185616	0.172005	0.107913	-3.21206	0.00961124
ENSG00000248711	THUMPD3P1	0.0502542	0.465691	0.107913	-3.21206	0.00961124
ENSG00000203724	C1orf53	0.0826403	0.765803	0.107913	-3.21206	0.00961124
ENSG00000214433	GOLGA2P8	0.0954766	0.884753	0.107913	-3.21206	0.00961124
ENSG00000272288	RP11-140K17.3	0.0964672	0.893933	0.107913	-3.21206	0.00961124
ENSG00000260418	RP3-406A7.7	0.198867	1.84284	0.107913	-3.21206	0.00961124
ENSG00000204653	ASPDH	0.0637919	0.590943	0.107949	-3.21157	1.44805e-06
ENSG00000253669	KB-1732A1.1	0.193444	1.79179	0.107961	-3.21141	1.30538e-14
ENSG00000101489	CELF4	0.0346604	0.321027	0.107967	-3.21133	4.3971e-11
ENSG00000235897	TM4SF19-AS1	0.0569146	0.527146	0.107967	-3.21133	4.67603e-05
ENSG00000261730	RP4-668J24.2	0.116548	1.07947	0.107967	-3.21133	4.67603e-05
ENSG00000204965	PCDHA5	0.011045	0.1023	0.107967	-3.21133	4.67603e-05
ENSG00000052802	MSMO1	2.55015	23.5029	0.108503	-3.20419	9.59398e-44
ENSG00000129048	ACKR4	0.222785	2.04395	0.108997	-3.19763	1.98287e-12
ENSG00000164841	TMEM74	0.124179	1.13493	0.109415	-3.19212	4.95679e-10
ENSG00000121577	POPDC2	0.256006	2.33172	0.109793	-3.18715	4.64087e-25
ENSG00000145087	STXBP5L	0.0243189	0.22149	0.109797	-3.18709	2.81996e-08
ENSG00000240445	FOXO3B	0.308779	2.81226	0.109798	-3.18708	3.7402e-13
ENSG00000179023	KLHDC7A	0.11571	1.05385	0.109798	-3.18708	3.7402e-13
ENSG00000101447	FAM83D	0.778416	7.07702	0.109992	-3.18453	1.74008e-32
ENSG00000163075	CFAP221	0.0886807	0.805719	0.110064	-3.18358	1.45972e-18
ENSG00000236085	ACTG1P4	0.198937	1.80194	0.110402	-3.17916	2.26763e-06
ENSG00000079385	CEACAM1	0.837699	7.55282	0.110912	-3.17251	2.15759e-42
ENSG00000137124	ALDH1B1	5.2803	47.5231	0.11111	-3.16994	1.95001e-45
ENSG00000112379	ARFGEF3	0.480183	4.30555	0.111527	-3.16454	4.57845e-39
ENSG00000241532	AGGF1P3	0.122697	1.09856	0.111689	-3.16244	7.67958e-05
ENSG00000241395	RN7SL344P	0.50281	4.50186	0.111689	-3.16244	7.67958e-05
ENSG00000222001	AC106876.2	0.12645	1.13216	0.111689	-3.16244	7.67958e-05
ENSG00000276434	RP11-391H12.8	0.5848	5.23587	0.111691	-3.16241	4.31634e-08
ENSG00000109132	PHOX2B	0.374048	3.34227	0.111914	-3.15954	8.984e-21
ENSG00000180914	OXTR	0.290721	2.59555	0.112008	-3.15833	1.41324e-24
ENSG00000099139	PCSK5	4.69808	41.8619	0.112228	-3.15549	2.78488e-49
ENSG00000168243	GNG4	0.212005	1.88885	0.112241	-3.15533	1.10224e-22
ENSG00000158220	ESYT3	0.0262314	0.233261	0.112455	-3.15258	1.11003e-09
ENSG00000127585	FBXL16	0.0360643	0.3207	0.112455	-3.15258	1.11003e-09
ENSG00000105427	CNFN	0.480671	4.27435	0.112455	-3.15258	1.11003e-09
ENSG00000175344	CHRNA7	0.217474	1.93257	0.112531	-3.1516	6.47601e-24
ENSG00000146904	EPHA1	0.367901	3.26731	0.112601	-3.15071	3.35713e-28
ENSG00000173890	GPR160	0.725043	6.41525	0.113019	-3.14537	7.5472e-37
ENSG00000131771	PPP1R1B	0.379289	3.35365	0.113097	-3.14436	1.06787e-31
ENSG00000148600	CDHR1	0.180766	1.59794	0.113125	-3.14402	2.66223e-29
ENSG00000164406	LEAP2	0.60236	5.31362	0.113362	-3.141	4.46023e-26
ENSG00000166165	CKB	1.20906	10.6562	0.113461	-3.13973	8.67288e-42
ENSG00000113396	SLC27A6	0.0615145	0.539419	0.114038	-3.13241	1.66343e-09
ENSG00000065320	NTN1	1.4998	13.1223	0.114294	-3.12918	1.4009e-40
ENSG00000176273	SLC35G1	0.24745	2.1627	0.114418	-3.12762	2.22854e-29
ENSG00000065361	ERBB3	2.01705	17.5995	0.114608	-3.12522	8.04319e-47
ENSG00000157680	DGKI	0.350123	3.05127	0.114747	-3.12347	2.69841e-38
ENSG00000127241	MASP1	0.0677768	0.588261	0.115216	-3.11759	1.75333e-20
ENSG00000114786	ABHD14A-ACY1	0.777664	6.73926	0.115393	-3.11537	9.18871e-26
ENSG00000232850	PTGES2-AS1	0.0354173	0.306327	0.115619	-3.11255	0.0160841
ENSG00000204118	NAP1L6	0.0363876	0.314719	0.115619	-3.11255	0.0160841
ENSG00000251417	RP11-1348G14.4	0.0378891	0.327705	0.115619	-3.11255	0.0160841
ENSG00000255741	RP11-757G1.5	0.130714	1.13055	0.115619	-3.11255	0.0160841
ENSG00000269275	CTD-2105E13.15	0.135971	1.17603	0.115619	-3.11255	0.0160841
ENSG00000117601	SERPINC1	0.0269187	0.232821	0.115619	-3.11255	0.0160841
ENSG00000259933	RP11-304L19.1	0.0757396	0.655077	0.115619	-3.11255	0.0160841
ENSG00000124097	HMGB1P1	0.116944	1.01146	0.115619	-3.11255	0.0160841
ENSG00000250148	KRT8P31	0.264233	2.28443	0.115667	-3.11195	2.49496e-09
ENSG00000175832	ETV4	0.0927181	0.801559	0.115672	-3.11189	1.22763e-13
ENSG00000080493	SLC4A4	0.474438	4.10143	0.115676	-3.11183	3.46569e-36
ENSG00000183317	EPHA10	0.0269891	0.233311	0.115679	-3.1118	1.01354e-07
ENSG00000145832	SLC25A48	0.0226463	0.195766	0.115681	-3.11178	0.000126105
ENSG00000273366	CTA-989H11.1	0.225845	1.95231	0.115681	-3.11178	0.000126105
ENSG00000176058	TPRN	0.738617	6.35638	0.116201	-3.10531	3.1714e-36
ENSG00000102743	SLC25A15	1.06708	9.14727	0.116656	-3.09967	2.64721e-27
ENSG00000118777	ABCG2	0.75342	6.45588	0.116703	-3.09909	2.59609e-35
ENSG00000164078	MST1R	0.330487	2.83024	0.11677	-3.09825	1.91484e-33
ENSG00000273162	RP11-108L7.15	0.457006	3.9036	0.117073	-3.09452	4.1753e-10
ENSG00000228113	AC003991.3	0.046951	0.400118	0.117343	-3.0912	3.7454e-09
ENSG00000233006	AC034220.3	0.336914	2.87098	0.117352	-3.09109	3.26182e-18
ENSG00000164107	HAND2	1.10491	9.34415	0.118246	-3.08014	6.29605e-37
ENSG00000115648	MLPH	0.235471	1.99135	0.118247	-3.08012	1.79333e-30
ENSG00000006047	YBX2	0.139241	1.17144	0.118863	-3.07262	7.64469e-19
ENSG00000170091	HMP19	0.180489	1.51081	0.119465	-3.06534	1.07949e-19
ENSG00000106078	COBL	0.469228	3.92676	0.119495	-3.06498	3.53236e-38
ENSG00000105699	LSR	0.618978	5.16956	0.119735	-3.06208	1.4979e-32
ENSG00000279693	RP11-71L14.3	1.59567	13.325	0.11975	-3.06191	3.91011e-33
ENSG00000057593	F7	0.223668	1.86454	0.119959	-3.05939	1.22028e-23
ENSG00000253671	RP11-806O11.1	0.105405	0.878637	0.119964	-3.05933	0.000206996
ENSG00000226986	RP11-543B16.2	0.225845	1.8826	0.119964	-3.05933	0.000206996
ENSG00000237977	EIF4HP2	0.528709	4.40723	0.119964	-3.05933	2.38639e-07
ENSG00000152785	BMP3	0.402311	3.34965	0.120105	-3.05763	1.11965e-25
ENSG00000163630	SYNPR	0.0220191	0.181314	0.121442	-3.04166	1.36697e-05
ENSG00000162105	SHANK2	0.174601	1.42972	0.122122	-3.0336	1.7236e-33
ENSG00000137267	TUBB2A	4.27375	34.9944	0.122127	-3.03355	8.05784e-38
ENSG00000125731	SH2D3A	0.217611	1.77907	0.122317	-3.0313	4.0599e-23
ENSG00000228221	LINC00578	0.707907	5.78547	0.122359	-3.0308	6.29758e-19
ENSG00000168062	BATF2	0.178083	1.45156	0.122684	-3.02698	1.67588e-20
ENSG00000172403	SYNPO2	14.258	116.177	0.122727	-3.02648	7.48995e-47
ENSG00000138018	EPT1	2.18986	17.8315	0.122809	-3.02551	3.97805e-44
ENSG00000196937	FAM3C	3.86705	31.2207	0.123862	-3.0132	6.63527e-41
ENSG00000106819	ASPN	7.5016	60.5529	0.123885	-3.01293	1.32205e-41
ENSG00000100628	ASB2	0.705981	5.68675	0.124145	-3.0099	3.04236e-35
ENSG00000163251	FZD5	2.31848	18.625	0.124482	-3.00599	1.26581e-40
ENSG00000080709	KCNN2	0.0255738	0.205322	0.124555	-3.00515	1.36697e-05
ENSG00000139914	FITM1	0.11194	0.89872	0.124555	-3.00515	1.36697e-05
ENSG00000228561	RP11-114M1.1	0.380252	3.05289	0.124555	-3.00515	1.36697e-05
ENSG00000235018	RP11-11M20.2	0.422742	3.39403	0.124555	-3.00515	1.36697e-05
ENSG00000126460	PRRG2	0.228258	1.83235	0.124572	-3.00495	4.53676e-14
ENSG00000280924	LINC00628	0.115463	0.926841	0.124577	-3.00489	0.000339552
ENSG00000225131	PSME2P2	0.212617	1.70671	0.124577	-3.00489	0.000339552
ENSG00000112232	KHDRBS2	0.255286	2.04921	0.124578	-3.00488	6.77288e-12
ENSG00000227502	LINC01268	0.432179	3.46915	0.124578	-3.00488	7.07189e-18
ENSG00000119283	TRIM67	0.0227259	0.182421	0.124579	-3.00487	3.66497e-07
ENSG00000097096	SYDE2	0.618847	4.96179	0.124723	-3.00321	2.18346e-32
ENSG00000100612	DHRS7	1.43361	11.4943	0.124724	-3.00319	8.49637e-38
ENSG00000107798	LIPA	8.97752	71.9115	0.124841	-3.00183	2.00003e-45
ENSG00000126562	WNK4	0.194291	1.55259	0.12514	-2.99839	1.65302e-18
ENSG00000117308	GALE	0.488286	3.88848	0.125573	-2.99341	5.67596e-31
ENSG00000076554	TPD52	0.375826	2.98812	0.125773	-2.9911	4.43182e-37
ENSG00000197279	ZNF165	0.21191	1.67922	0.126196	-2.98627	2.7836e-09
ENSG00000167608	TMC4	1.5839	12.5485	0.126223	-2.98595	5.42605e-36
ENSG00000160188	RSPH1	0.188277	1.48557	0.126737	-2.98009	3.2101e-12
ENSG00000171067	C11orf24	1.37367	10.7671	0.12758	-2.97053	5.22946e-36
ENSG00000086289	EPDR1	0.774958	6.06138	0.127852	-2.96746	4.86323e-28
ENSG00000167701	GPT	0.533337	4.166	0.128021	-2.96554	8.21037e-27
ENSG00000132563	REEP2	0.156688	1.2232	0.128097	-2.96469	2.80453e-16
ENSG00000102466	FGF14	0.0418154	0.325974	0.128278	-2.96265	1.93377e-11
ENSG00000180071	ANKRD18A	0.417364	3.25179	0.128349	-2.96186	6.43209e-25
ENSG00000238045	AC009133.12	0.34251	2.66667	0.128441	-2.96082	6.53507e-21
ENSG00000067606	PRKCZ	0.644112	5.01372	0.12847	-2.9605	3.10116e-35
ENSG00000184792	OSBP2	0.37648	2.92253	0.12882	-2.95657	1.18246e-33
ENSG00000214376	VSTM5	0.0626	0.483171	0.129561	-2.9483	8.65672e-07
ENSG00000260664	AC004158.3	0.024955	0.192609	0.129563	-2.94827	0.000339552
ENSG00000126003	PLAGL2	5.54351	42.6714	0.129912	-2.9444	5.30875e-42
ENSG00000104112	SCG3	0.144613	1.11128	0.130132	-2.94195	6.21837e-12
ENSG00000177181	RIMKLA	0.0708305	0.544297	0.130132	-2.94195	6.21837e-12
ENSG00000136379	ABHD17C	0.616135	4.72504	0.130398	-2.93901	1.56997e-30
ENSG00000164976	KIAA1161	2.22873	17.0757	0.13052	-2.93766	4.60424e-39
ENSG00000008517	IL32	0.831525	6.36638	0.130612	-2.93664	3.96292e-39
ENSG00000135744	AGT	7.01586	53.6913	0.13067	-2.936	2.97328e-39
ENSG00000166510	CCDC68	0.599913	4.56877	0.131307	-2.92898	6.12989e-32
ENSG00000146216	TTBK1	0.0595088	0.453187	0.131312	-2.92893	8.76078e-09
ENSG00000069535	MAOB	3.52107	26.7969	0.131398	-2.92798	2.05716e-37
ENSG00000241095	CYP51A1P1	0.493801	3.75037	0.131667	-2.92503	9.98647e-13
ENSG00000234857	HNRNPUL2-BSCL2	0.0743972	0.562745	0.132204	-2.91916	1.33121e-06
ENSG00000172366	FAM195A	0.38654	2.92256	0.13226	-2.91855	3.79753e-27
ENSG00000120057	SFRP5	1.01327	7.65825	0.13231	-2.918	2.3216e-21
ENSG00000232680	AC002511.3	1.41386	10.6603	0.132629	-2.91453	2.80334e-18
ENSG00000101670	LIPG	0.593555	4.46316	0.13299	-2.91061	2.31669e-36
ENSG00000147144	CCDC120	0.634426	4.76178	0.133233	-2.90798	5.28947e-35
ENSG00000235552	RPL6P27	6.77323	50.7009	0.133592	-2.9041	1.68585e-36
ENSG00000179168	GGN	0.134236	1.0039	0.133714	-2.90278	1.68503e-11
ENSG00000178538	CA8	0.411365	3.0482	0.134954	-2.88946	9.69262e-25
ENSG00000251455	RP11-164P12.3	0.058024	0.429934	0.13496	-2.88939	0.000556462
ENSG00000223806	LINC00114	0.0722484	0.535331	0.13496	-2.88939	0.000556462
ENSG00000184515	BEX5	0.0864797	0.64078	0.13496	-2.88939	0.000556462
ENSG00000124253	PCK1	2.11728	15.6498	0.135291	-2.88587	6.79103e-40
ENSG00000088256	GNA11	5.68564	41.9186	0.135635	-2.88219	1.51783e-41
ENSG00000189221	MAOA	1.99547	14.6354	0.136345	-2.87466	2.5422e-38
ENSG00000166582	CENPV	0.631965	4.63398	0.136376	-2.87434	3.73177e-25
ENSG00000214797	RP11-1036E20.9	0.159178	1.16307	0.136861	-2.86922	1.88715e-08
ENSG00000267504	RP11-845C23.2	0.405536	2.96313	0.136861	-2.86922	1.88715e-08
ENSG00000164161	HHIP	0.463296	3.38474	0.136878	-2.86904	2.52998e-32
ENSG00000147036	LANCL3	0.0288515	0.21024	0.137231	-2.86532	9.9317e-08
ENSG00000144285	SCN1A	0.0175893	0.127615	0.137831	-2.85903	3.15035e-06
ENSG00000147255	IGSF1	0.0326815	0.237113	0.137831	-2.85903	3.15035e-06
ENSG00000123684	LPGAT1	10.375	74.9369	0.138449	-2.85257	3.22331e-42
ENSG00000065618	COL17A1	0.21924	1.5815	0.138628	-2.85071	3.93044e-19
ENSG00000242173	ARHGDIG	0.0645669	0.465205	0.138792	-2.849	2.5283e-05
ENSG00000165474	GJB2	0.146897	1.05828	0.138808	-2.84884	4.59288e-11
ENSG00000118729	CASQ2	1.23424	8.89141	0.138812	-2.84879	1.90391e-26
ENSG00000150394	CDH8	0.038802	0.279523	0.138815	-2.84876	2.34186e-13
ENSG00000236780	AC078941.1	0.141162	1.01691	0.138815	-2.84876	2.77199e-08
ENSG00000091622	PITPNM3	0.233654	1.68228	0.138892	-2.84797	6.38116e-27
ENSG00000159307	SCUBE1	0.204643	1.46517	0.139672	-2.83988	6.06251e-24
ENSG00000159228	CBR1	2.27177	16.2101	0.140145	-2.83501	1.97177e-34
ENSG00000132849	INADL	1.51873	10.8318	0.14021	-2.83434	5.875e-39
ENSG00000170396	ZNF804A	0.174165	1.24217	0.14021	-2.83434	8.83201e-18
ENSG00000169862	CTNND2	0.0570885	0.407002	0.140266	-2.83376	8.30547e-13
ENSG00000156463	SH3RF2	1.03826	7.39968	0.140311	-2.8333	3.07619e-34
ENSG00000280099	RP11-33E12.2	0.650086	4.62975	0.140415	-2.83223	6.11584e-15
ENSG00000236008	AC011747.4	0.219944	1.56435	0.140598	-2.83035	1.3374e-20
ENSG00000040608	RTN4R	0.0252257	0.179126	0.140826	-2.82801	0.000910749
ENSG00000080224	EPHA6	0.0357553	0.253897	0.140826	-2.82801	3.15035e-06
ENSG00000187699	C2orf88	0.414556	2.934	0.141294	-2.82323	1.08517e-26
ENSG00000152503	TRIM36	0.145791	1.0308	0.141435	-2.82179	1.11132e-17
ENSG00000185436	IFNLR1	0.298853	2.11191	0.141508	-2.82104	1.95993e-20
ENSG00000147872	PLIN2	8.51896	60.0349	0.1419	-2.81705	5.67004e-41
ENSG00000158246	FAM46B	1.13129	7.93638	0.142545	-2.81052	4.16704e-23
ENSG00000166762	CATSPER2	0.459962	3.22541	0.142606	-2.8099	1.61794e-29
ENSG00000235097	LINC00330	0.1462	1.01557	0.143958	-2.79628	4.8473e-06
ENSG00000125968	ID1	7.05039	48.9413	0.144058	-2.79528	4.86676e-36
ENSG00000162522	KIAA1522	2.33956	16.1978	0.144437	-2.79149	5.36244e-36
ENSG00000155265	GOLGA7B	0.0618696	0.427196	0.144827	-2.7876	2.91033e-12
ENSG00000171320	ESCO2	0.193676	1.33688	0.144871	-2.78716	2.4773e-20
ENSG00000171094	ALK	0.0631282	0.434378	0.14533	-2.78259	5.93199e-09
ENSG00000133019	CHRM3	0.38181	2.62709	0.145336	-2.78254	2.23502e-29
ENSG00000156968	MPV17L	0.389762	2.67274	0.145829	-2.77765	3.13819e-23
ENSG00000234771	SLC25A25-AS1	3.09716	21.1881	0.146175	-2.77424	1.4869e-36
ENSG00000167588	GPD1	9.24799	63.2552	0.146201	-2.77397	3.51262e-39
ENSG00000187824	TMEM220	0.928312	6.34703	0.146259	-2.7734	2.28179e-28
ENSG00000157502	MUM1L1	0.100844	0.689398	0.146279	-2.77321	5.38763e-14
ENSG00000129007	CALML4	0.402116	2.74213	0.146644	-2.76961	1.64439e-30
ENSG00000109255	NMU	0.10068	0.683961	0.147202	-2.76413	6.47698e-05
ENSG00000280439	RP4-568B10.1	0.352063	2.39171	0.147202	-2.76413	6.47698e-05
ENSG00000188394	GPR21	0.317982	2.16001	0.147214	-2.76402	5.18846e-07
ENSG00000112280	COL9A1	0.102291	0.694808	0.147222	-2.76393	3.53965e-13
ENSG00000257723	CHCHD3P2	0.232913	1.58202	0.147226	-2.7639	0.00148807
ENSG00000204613	TRIM10	0.187749	1.27523	0.147228	-2.76387	7.14448e-14
ENSG00000163497	FEV	0.122849	0.834409	0.147229	-2.76387	7.45832e-06
ENSG00000059728	MXD1	1.75498	11.8433	0.148183	-2.75455	1.01123e-36
ENSG00000171476	HOPX	0.33614	2.26467	0.148428	-2.75217	2.86863e-26
ENSG00000156076	WIF1	0.506216	3.4055	0.148647	-2.75004	3.95366e-16
ENSG00000111816	FRK	1.76613	11.8607	0.148905	-2.74753	1.29937e-36
ENSG00000231969	AC144449.1	0.582511	3.91156	0.148921	-2.74738	9.57528e-10
ENSG00000135540	NHSL1	5.01456	33.5858	0.149306	-2.74366	2.71156e-39
ENSG00000264575	LINC00526	0.595305	3.97003	0.14995	-2.73745	2.68243e-14
ENSG00000203799	CCDC162P	0.0952218	0.635002	0.149955	-2.7374	6.73707e-11
ENSG00000248383	PCDHAC1	0.0317474	0.210733	0.150652	-2.73071	1.14745e-05
ENSG00000107242	PIP5K1B	2.11141	13.9767	0.151066	-2.72674	3.37931e-34
ENSG00000213590	RP11-229P13.2	0.168841	1.11226	0.1518	-2.71975	6.47698e-05
ENSG00000063015	SEZ6	0.0159071	0.104789	0.1518	-2.71975	6.47698e-05
ENSG00000139209	SLC38A4	0.26738	1.75839	0.152059	-2.7173	2.89373e-16
ENSG00000166257	SCN3B	0.151751	0.996034	0.152356	-2.71449	7.85846e-19
ENSG00000151838	CCDC175	0.146236	0.959394	0.152425	-2.71383	1.96314e-09
ENSG00000179796	LRRC3B	0.0785722	0.514326	0.152767	-2.71059	7.85153e-07
ENSG00000072041	SLC6A15	0.024801	0.162345	0.152767	-2.71059	7.85153e-07
ENSG00000121690	DEPDC7	0.692573	4.53318	0.152779	-2.71048	1.58768e-23
ENSG00000058085	LAMC2	0.80731	5.27167	0.153141	-2.70706	2.31215e-28
ENSG00000143061	IGSF3	1.55041	10.0544	0.154203	-2.6971	1.88125e-34
ENSG00000253958	CLDN23	0.96061	6.2283	0.154233	-2.69681	5.30926e-19
ENSG00000224769	MUC20P1	0.442951	2.87184	0.15424	-2.69675	1.29951e-10
ENSG00000258608	DNAJC19P9	0.424022	2.74908	0.154241	-2.69674	0.0024261
ENSG00000149596	JPH2	2.26235	14.6614	0.154307	-2.69613	7.98197e-34
ENSG00000196975	ANXA4	3.10742	20.1097	0.154524	-2.6941	4.76558e-37
ENSG00000128311	TST	1.92577	12.3792	0.155565	-2.68441	1.12675e-27
ENSG00000272183	RP11-523H20.3	0.57325	3.68159	0.155707	-2.68309	1.18844e-06
ENSG00000234690	AC073283.4	0.19578	1.25723	0.155722	-2.68295	1.80632e-10
ENSG00000154380	ENAH	2.86478	18.3885	0.155791	-2.68231	7.58879e-38
ENSG00000181751	C5orf30	0.676033	4.33016	0.156122	-2.67925	2.53738e-26
ENSG00000186301	MST1P2	0.876991	5.61582	0.156164	-2.67886	2.11432e-18
ENSG00000128266	GNAZ	1.04303	6.66197	0.156564	-2.67518	6.04819e-26
ENSG00000129990	SYT5	0.020362	0.129942	0.1567	-2.67392	0.000103608
ENSG00000205622	AF064858.6	0.0248589	0.15864	0.1567	-2.67392	0.000103608
ENSG00000241360	PDXP	0.955892	6.09496	0.156833	-2.6727	3.96013e-23
ENSG00000125966	MMP24	0.16859	1.07223	0.157234	-2.66902	2.51211e-10
ENSG00000196361	ELAVL3	0.127818	0.812919	0.157234	-2.66902	2.51211e-10
ENSG00000068615	REEP1	0.894754	5.66554	0.157929	-2.66265	5.9004e-30
ENSG00000255330	RP3-403A15.5	0.0645644	0.408633	0.158001	-2.662	8.06291e-12
ENSG00000196427	NBPF4	0.106422	0.67355	0.158002	-2.66199	2.71364e-05
ENSG00000197241	SLC2A7	0.193413	1.22412	0.158002	-2.66199	2.71364e-05
ENSG00000140416	TPM1	8.91713	56.4245	0.158036	-2.66167	3.71178e-38
ENSG00000198814	GK	2.55776	16.1373	0.1585	-2.65744	1.04676e-34
ENSG00000198467	TPM2	18.0202	113.353	0.158973	-2.65314	1.04307e-37
ENSG00000145103	ILDR1	0.0890496	0.559017	0.159297	-2.65021	2.09998e-07
ENSG00000234224	TMEM229A	0.494223	3.09526	0.159671	-2.64683	1.23682e-12
ENSG00000248713	RP11-766F14.2	0.059025	0.369017	0.159952	-2.64429	8.3061e-09
ENSG00000060971	ACAA1	1.82782	11.4137	0.160142	-2.64257	8.92153e-35
ENSG00000167723	TRPV3	0.182717	1.13984	0.160301	-2.64115	2.68659e-21
ENSG00000137819	PAQR5	0.067137	0.418339	0.160485	-2.63949	6.97392e-11
ENSG00000254806	SYS1-DBNDD2	0.803532	5.00483	0.160552	-2.63889	2.14769e-16
ENSG00000171368	TPPP	0.654919	4.07457	0.160733	-2.63726	1.19159e-23
ENSG00000160190	SLC37A1	2.31282	14.3482	0.161192	-2.63315	5.05638e-33
ENSG00000159176	CSRP1	3.88954	24.025	0.161895	-2.62687	5.64134e-37
ENSG00000107295	SH3GL2	0.0784011	0.48419	0.161922	-2.62663	0.000165623
ENSG00000171450	CDK5R2	0.0889984	0.549636	0.161922	-2.62663	0.000165623
ENSG00000183346	C10orf107	0.124488	0.768816	0.161922	-2.62663	0.000165623
ENSG00000265393	CTD-2517M22.17	0.660378	4.07837	0.161922	-2.62663	0.000165623
ENSG00000144290	SLC4A10	0.0162593	0.100414	0.161922	-2.62663	0.000165623
ENSG00000254827	SLC22A18AS	0.179983	1.11143	0.161939	-2.62648	8.08101e-08
ENSG00000114757	PEX5L	0.00845634	0.0522155	0.161951	-2.62637	0.00394482
ENSG00000280285	RP11-630A13.4	0.046135	0.28487	0.161951	-2.62637	0.00394482
ENSG00000180999	C1orf105	0.0555757	0.343164	0.161951	-2.62637	0.00394482
ENSG00000269911	RP1-172N19.5	0.099887	0.616773	0.161951	-2.62637	0.00394482
ENSG00000273046	RP11-834C11.14	0.10715	0.661621	0.161951	-2.62637	0.00394482
ENSG00000256443	RP11-794G24.1	0.406422	2.50954	0.161951	-2.62637	4.8663e-10
ENSG00000266651	RP11-138I1.3	0.489578	3.023	0.161951	-2.62637	0.00394482
ENSG00000141198	TOM1L1	0.45649	2.81199	0.162337	-2.62293	5.59937e-27
ENSG00000145649	GZMA	2.16413	13.312	0.16257	-2.62087	1.70815e-17
ENSG00000187720	THSD4	1.54906	9.46301	0.163696	-2.61091	1.21992e-34
ENSG00000169242	EFNA1	1.10331	6.73941	0.16371	-2.61078	5.82094e-25
ENSG00000099849	RASSF7	0.158881	0.968778	0.164001	-2.60822	3.86548e-13
ENSG00000185352	HS6ST3	0.0350118	0.213117	0.164285	-2.60573	1.17539e-07
ENSG00000281207	SLFNL1-AS1	1.14721	6.97858	0.16439	-2.6048	8.04579e-26
ENSG00000120053	GOT1	2.04484	12.438	0.164403	-2.60469	6.23781e-27
ENSG00000205795	CYS1	0.256433	1.55468	0.164943	-2.59996	1.82808e-10
ENSG00000095585	BLNK	2.20517	13.3608	0.165048	-2.59905	2.9217e-30
ENSG00000138771	SHROOM3	1.76708	10.7057	0.16506	-2.59893	3.01454e-34
ENSG00000105409	ATP1A3	0.296113	1.79191	0.16525	-2.59728	2.42175e-18
ENSG00000262943	ALOX12P2	0.155763	0.941566	0.16543	-2.59571	1.35966e-14
ENSG00000265763	ZNF488	0.0975106	0.588752	0.165623	-2.59403	2.75878e-09
ENSG00000120915	EPHX2	3.38025	20.401	0.16569	-2.59344	1.20414e-33
ENSG00000146469	VIP	1.98226	11.9464	0.16593	-2.59135	1.85349e-22
ENSG00000187097	ENTPD5	2.53943	15.2804	0.166189	-2.5891	1.11327e-33
ENSG00000066468	FGFR2	0.358612	2.15399	0.166487	-2.58651	1.44314e-27
ENSG00000107954	NEURL1	0.712158	4.27678	0.166517	-2.58626	1.31065e-22
ENSG00000250722	SEPP1	11.6856	70.1275	0.166634	-2.58524	2.64237e-36
ENSG00000134291	TMEM106C	0.772455	4.63356	0.166709	-2.5846	6.28778e-28
ENSG00000160972	PPP1R16A	1.02046	6.12001	0.166741	-2.58432	4.44678e-30
ENSG00000163541	SUCLG1	3.35746	20.1154	0.16691	-2.58286	1.5133e-32
ENSG00000130940	CASZ1	1.2423	7.4409	0.166955	-2.58247	4.8699e-32
ENSG00000074211	PPP2R2C	0.062096	0.371921	0.16696	-2.58243	1.31681e-09
ENSG00000124299	PEPD	2.83822	16.9972	0.166982	-2.58224	2.94399e-32
ENSG00000171219	CDC42BPG	0.624657	3.73796	0.167112	-2.58111	4.22632e-23
ENSG00000270988	RP11-439C15.5	0.44911	2.68119	0.167504	-2.57773	0.000264517
ENSG00000271643	RP11-10C24.3	0.353519	2.1101	0.167537	-2.57745	4.67112e-07
ENSG00000167748	KLK1	0.12358	0.737631	0.167537	-2.57745	4.67112e-07
ENSG00000120341	SEC16B	1.4955	8.91684	0.167717	-2.5759	7.95946e-31
ENSG00000261616	RP11-6O2.3	0.86173	5.1322	0.167907	-2.57427	2.36599e-18
ENSG00000072201	LNX1	0.386094	2.29933	0.167916	-2.57419	2.68776e-21
ENSG00000110693	SOX6	0.577261	3.43546	0.16803	-2.57321	1.56018e-30
ENSG00000259479	SORD2P	0.188994	1.12461	0.168054	-2.573	2.52312e-10
ENSG00000016391	CHDH	0.392596	2.33463	0.168162	-2.57207	1.80354e-21
ENSG00000097021	ACOT7	1.04714	6.22553	0.1682	-2.57175	1.47493e-25
ENSG00000164626	KCNK5	2.23874	13.2857	0.168507	-2.56912	4.68761e-28
ENSG00000272949	RP11-514P8.8	0.250207	1.48058	0.168993	-2.56496	7.13952e-11
ENSG00000122786	CALD1	13.3821	79.1001	0.16918	-2.56337	5.70124e-36
ENSG00000184368	MAP7D2	0.0952229	0.561876	0.169473	-2.56087	3.91821e-09
ENSG00000143036	SLC44A3	0.942574	5.54458	0.169999	-2.5564	4.75026e-23
ENSG00000178146	RP1-232L22__B.1	2.03806	11.9703	0.17026	-2.55419	9.39333e-21
ENSG00000056736	IL17RB	0.30926	1.81422	0.170465	-2.55245	1.21368e-13
ENSG00000113327	GABRG2	0.0147052	0.0862618	0.170472	-2.55239	0.00639309
ENSG00000249816	LINC00964	0.0162746	0.095468	0.170472	-2.55239	0.00639309
ENSG00000086717	PPEF1	0.0244548	0.143453	0.170472	-2.55239	0.00639309
ENSG00000149043	SYT8	0.0133517	0.078322	0.170472	-2.55239	0.00639309
ENSG00000162755	KLHDC9	0.0375363	0.22019	0.170472	-2.55239	0.00639309
ENSG00000187957	DNER	0.226935	1.33119	0.170475	-2.55237	9.76946e-11
ENSG00000167654	ATCAY	0.0854176	0.501055	0.170476	-2.55236	2.56281e-09
ENSG00000219891	ZSCAN12P1	0.143383	0.841073	0.170476	-2.55236	6.40444e-05
ENSG00000254550	OMP	0.605007	3.54892	0.170476	-2.55236	6.40444e-05
ENSG00000214193	SH3D21	1.02217	5.99042	0.170633	-2.55103	1.30578e-27
ENSG00000149591	TAGLN	42.1903	247.048	0.170778	-2.54981	9.28745e-36
ENSG00000023171	GRAMD1B	0.762695	4.45486	0.171205	-2.5462	1.80606e-30
ENSG00000273151	RP11-449P15.2	0.297305	1.73382	0.171474	-2.54393	8.49855e-17
ENSG00000157388	CACNA1D	1.22411	7.12385	0.171832	-2.54093	6.94507e-31
ENSG00000257335	MGAM	2.26032	13.13	0.172149	-2.53827	1.13427e-32
ENSG00000278978	RP11-164P12.5	0.518161	3.00784	0.17227	-2.53725	9.45135e-06
ENSG00000166573	GALR1	0.0574695	0.332677	0.172749	-2.53325	5.09196e-08
ENSG00000041982	TNC	14.082	81.4811	0.172825	-2.53261	2.99142e-35
ENSG00000233588	CYP51A1P2	0.843915	4.87389	0.17315	-2.5299	9.22615e-13
ENSG00000228643	AC079779.4	0.205532	1.18469	0.17349	-2.52707	0.000421961
ENSG00000271781	CTD-2589H19.6	0.282184	1.62651	0.17349	-2.52707	0.000421961
ENSG00000117480	FAAH	1.23167	7.0984	0.173514	-2.52687	2.45991e-24
ENSG00000274979	RP11-1143G9.5	0.0841015	0.484684	0.173518	-2.52684	1.04e-06
ENSG00000165475	CRYL1	6.66701	38.348	0.173856	-2.52404	4.07738e-31
ENSG00000156711	MAPK13	3.43038	19.7206	0.173949	-2.52327	1.72525e-32
ENSG00000165410	CFL2	1.45129	8.33316	0.174159	-2.52153	8.27183e-31
ENSG00000198018	ENTPD7	8.18947	46.8689	0.174731	-2.51679	1.18903e-32
ENSG00000203706	SERTAD4-AS1	0.271096	1.54839	0.175083	-2.51389	9.82733e-05
ENSG00000173641	HSPB7	2.62407	14.9863	0.175098	-2.51377	1.66533e-30
ENSG00000266010	GATA6-AS1	0.997888	5.69235	0.175303	-2.51207	7.99208e-20
ENSG00000136425	CIB2	0.56793	3.23926	0.175327	-2.51188	4.84578e-19
ENSG00000078295	ADCY2	0.0653305	0.372042	0.1756	-2.50964	4.44115e-13
ENSG00000167642	SPINT2	1.14178	6.48633	0.176029	-2.50611	1.81053e-28
ENSG00000155465	SLC7A7	1.92713	10.9143	0.17657	-2.50169	2.0027e-31
ENSG00000198088	NUP62CL	0.14558	0.823999	0.176675	-2.50083	1.5521e-06
ENSG00000146955	RAB19	0.348008	1.96976	0.176675	-2.50083	1.5521e-06
ENSG00000145936	KCNMB1	2.32436	13.1532	0.176715	-2.50051	8.40081e-30
ENSG00000240602	AADACP1	0.122963	0.694232	0.177121	-2.49719	5.27277e-07
ENSG00000272079	LA16c-380H5.5	0.410458	2.31739	0.177121	-2.49719	5.27277e-07
ENSG00000250889	LINC01336	0.514187	2.90303	0.177121	-2.49719	5.27277e-07
ENSG00000230818	MTND2P16	0.651904	3.68056	0.177121	-2.49719	5.27277e-07
ENSG00000141052	MYOCD	2.03706	11.5005	0.177129	-2.49713	2.05589e-31
ENSG00000162409	PRKAA2	0.270971	1.52979	0.17713	-2.49712	1.146e-22
ENSG00000131981	LGALS3	11.6727	65.8598	0.177236	-2.49626	6.15878e-33
ENSG00000101335	MYL9	76.6448	432.368	0.177268	-2.496	1.65558e-34
ENSG00000162769	FLVCR1	2.7244	15.3641	0.177323	-2.49555	1.0445e-30
ENSG00000119899	SLC17A5	3.36631	18.9754	0.177404	-2.49489	8.19582e-29
ENSG00000142149	HUNK	0.758642	4.2727	0.177556	-2.49365	2.50912e-25
ENSG00000142949	PTPRF	6.62719	37.2744	0.177795	-2.49172	3.73848e-34
ENSG00000126950	TMEM35	0.481232	2.70568	0.17786	-2.49118	2.19007e-13
ENSG00000164099	PRSS12	0.535521	3.00484	0.17822	-2.48827	3.82971e-20
ENSG00000073803	MAP3K13	1.02504	5.74234	0.178506	-2.48596	4.62565e-30
ENSG00000117226	GBP3	2.07578	11.5575	0.179604	-2.47711	1.22338e-30
ENSG00000119938	PPP1R3C	4.42237	24.6132	0.179675	-2.47654	6.67215e-28
ENSG00000167114	SLC27A4	3.18691	17.7324	0.179722	-2.47616	8.66043e-29
ENSG00000172014	ANKRD20A4	0.0408432	0.227015	0.179914	-2.47462	0.000672116
ENSG00000255404	RP11-770G2.5	0.213801	1.18835	0.179914	-2.47462	0.000672116
ENSG00000274023	RP11-732M18.4	0.397875	2.21147	0.179914	-2.47462	0.000672116
ENSG00000249853	HS3ST5	0.0885808	0.492312	0.179928	-2.47451	1.43018e-05
ENSG00000170743	SYT9	0.0521429	0.289798	0.179928	-2.47451	1.43018e-05
ENSG00000229146	SNX18P4	0.443961	2.46743	0.179928	-2.47451	1.43018e-05
ENSG00000273045	C2orf15	0.097371	0.541117	0.179945	-2.47438	0.000150641
ENSG00000141854	CTB-55O6.8	0.205995	1.14476	0.179946	-2.47437	4.30428e-12
ENSG00000179362	HMGN2P46	0.0272436	0.151396	0.179949	-2.47434	0.00639309
ENSG00000172568	FNDC9	0.0520937	0.289491	0.179949	-2.47434	0.00639309
ENSG00000197251	LINC00336	0.0706367	0.392537	0.179949	-2.47434	0.00639309
ENSG00000266968	RP11-116O18.1	0.0833791	0.463348	0.179949	-2.47434	0.00639309
ENSG00000218018	RP4-800J21.3	0.0966439	0.537062	0.179949	-2.47434	0.00639309
ENSG00000225401	TGIF2P1	0.217272	1.20741	0.179949	-2.47434	0.00639309
ENSG00000242747	RP11-30K9.1	0.312671	1.73755	0.179949	-2.47434	0.00639309
ENSG00000226598	AC017060.1	0.336723	1.87121	0.179949	-2.47434	0.00639309
ENSG00000128268	MGAT3	1.16742	6.47291	0.180354	-2.4711	3.22595e-25
ENSG00000178537	SLC25A20	1.87992	10.3722	0.181246	-2.46398	9.06621e-26
ENSG00000171793	CTPS1	3.25143	17.9131	0.181512	-2.46186	1.84471e-30
ENSG00000165521	EML5	0.172187	0.948053	0.181622	-2.46099	4.86998e-18
ENSG00000135378	PRRG4	0.484429	2.66723	0.181622	-2.46099	4.86998e-18
ENSG00000131242	RAB11FIP4	0.388085	2.13545	0.181734	-2.4601	1.25388e-24
ENSG00000117155	SSX2IP	0.522092	2.86734	0.182082	-2.45734	3.51734e-24
ENSG00000159217	IGF2BP1	1.30858	7.1811	0.182226	-2.4562	1.94702e-28
ENSG00000152782	PANK1	0.71034	3.88761	0.182719	-2.4523	8.06934e-25
ENSG00000282889	AL365273.1	1.92852	10.5532	0.182743	-2.45211	5.13806e-16
ENSG00000144834	TAGLN3	0.0698303	0.380878	0.18334	-2.4474	3.45695e-06
ENSG00000127561	SYNGR3	0.069874	0.381116	0.18334	-2.4474	3.45695e-06
ENSG00000103175	WFDC1	1.14875	6.25547	0.183639	-2.44506	8.07039e-28
ENSG00000134028	ADAMDEC1	1.72633	9.39567	0.183737	-2.44428	4.46576e-24
ENSG00000214796	RP11-480I12.5	0.178584	0.970374	0.184036	-2.44194	1.90648e-08
ENSG00000160224	AIRE	0.29461	1.59961	0.184176	-2.44084	7.69232e-16
ENSG00000238105	GOLGA2P5	0.284353	1.53101	0.18573	-2.42873	1.59373e-23
ENSG00000070031	SCT	1.42315	7.65823	0.185832	-2.42793	1.62683e-06
ENSG00000243896	OR2A7	1.13354	6.09366	0.186019	-2.42648	1.03057e-11
ENSG00000164142	FAM160A1	0.51684	2.77253	0.186415	-2.42341	1.43071e-19
ENSG00000197375	SLC22A5	1.16601	6.2517	0.186511	-2.42267	2.00104e-29
ENSG00000182057	OGFRP1	0.0984162	0.526763	0.186832	-2.42019	0.00106861
ENSG00000282418	RP11-496N12.9	0.399299	2.13721	0.186832	-2.42019	0.00106861
ENSG00000122121	XPNPEP2	12.7716	68.3481	0.186861	-2.41996	2.47767e-31
ENSG00000106537	TSPAN13	8.41927	44.9897	0.187138	-2.41783	4.88215e-29
ENSG00000144406	UNC80	0.0596416	0.31857	0.187216	-2.41722	4.9744e-13
ENSG00000205352	PRR13	0.907378	4.8418	0.187405	-2.41577	7.22328e-25
ENSG00000151572	ANO4	0.050494	0.268165	0.188295	-2.40894	3.27027e-05
ENSG00000095203	EPB41L4B	1.67168	8.87614	0.188334	-2.40863	2.67669e-27
ENSG00000177465	ACOT4	0.220521	1.16722	0.188928	-2.40409	2.36802e-06
ENSG00000180660	MAB21L1	0.22117	1.16847	0.189282	-2.40139	6.58257e-08
ENSG00000178075	GRAMD1C	0.350868	1.85076	0.189581	-2.39912	1.43468e-20
ENSG00000124920	MYRF	0.549569	2.89163	0.190055	-2.39551	4.20785e-25
ENSG00000180921	FAM83H	0.915614	4.81565	0.190133	-2.39492	7.54782e-25
ENSG00000174136	RGMB	2.18357	11.4839	0.190142	-2.39485	6.59051e-29
ENSG00000204962	PCDHA8	0.0188969	0.0991796	0.190532	-2.3919	0.0103193
ENSG00000177234	LINC01561	0.0343246	0.180152	0.190532	-2.3919	0.0103193
ENSG00000214940	NPIPA8	0.0689674	0.361974	0.190532	-2.3919	0.0103193
ENSG00000168539	CHRM1	0.0264073	0.138598	0.190532	-2.3919	0.0103193
ENSG00000187045	TMPRSS6	0.0272585	0.143066	0.190532	-2.3919	0.0103193
ENSG00000214215	C12orf74	0.0368395	0.193351	0.190532	-2.3919	0.0103193
ENSG00000165973	NELL1	0.0499938	0.262391	0.190532	-2.3919	5.15833e-06
ENSG00000016402	IL20RA	0.0502046	0.263498	0.190532	-2.3919	0.000352577
ENSG00000106853	PTGR1	3.99731	20.9688	0.190632	-2.39114	4.1806e-29
ENSG00000040199	PHLPP2	1.00865	5.28203	0.190958	-2.38867	9.27091e-29
ENSG00000102890	ELMO3	1.24375	6.50626	0.191162	-2.38714	8.97694e-20
ENSG00000181072	CHRM2	0.363265	1.89561	0.191635	-2.38357	9.44684e-22
ENSG00000236360	RP11-334A14.2	1.33407	6.95653	0.191772	-2.38253	9.37918e-08
ENSG00000180185	FAHD1	1.41061	7.34997	0.19192	-2.38142	4.06938e-23
ENSG00000245848	CEBPA	7.29709	37.9332	0.192367	-2.37807	3.45146e-28
ENSG00000249604	RP11-286E11.2	0.11822	0.613251	0.192777	-2.375	4.94043e-05
ENSG00000261762	RP11-650L12.2	0.17272	0.895961	0.192777	-2.375	4.94043e-05
ENSG00000215529	EFCAB8	0.115463	0.597094	0.193375	-2.37053	6.52268e-07
ENSG00000205277	MUC12	0.0246636	0.127375	0.193629	-2.36863	1.24661e-08
ENSG00000181847	TIGIT	0.0222208	0.114357	0.19431	-2.36357	0.00106861
ENSG00000158806	NPM2	0.0501478	0.258081	0.19431	-2.36357	0.00106861
ENSG00000256870	SLC5A8	0.0534246	0.274945	0.19431	-2.36357	0.00106861
ENSG00000089163	SIRT4	0.0910309	0.468482	0.19431	-2.36357	0.00106861
ENSG00000259433	CTD-2651B20.4	0.0920065	0.473503	0.19431	-2.36357	0.00106861
ENSG00000119042	SATB2	0.501296	2.57955	0.194335	-2.36339	1.30042e-24
ENSG00000144230	GPR17	0.0611637	0.314723	0.194341	-2.36334	7.6953e-06
ENSG00000161082	CELF5	0.0494567	0.254484	0.194341	-2.36334	7.6953e-06
ENSG00000164761	TNFRSF11B	0.247503	1.27355	0.194341	-2.36334	4.35654e-09
ENSG00000005022	SLC25A5	25.1866	129.591	0.194355	-2.36323	8.49633e-31
ENSG00000137171	KLC4	1.22142	6.28398	0.19437	-2.36312	2.20581e-27
ENSG00000171766	GATM	1.31107	6.74237	0.194453	-2.36251	6.66911e-27
ENSG00000261572	RP11-384L8.1	0.275447	1.40934	0.195444	-2.35517	3.44626e-06
ENSG00000187546	AGMO	0.573195	2.93268	0.195451	-2.35512	9.4448e-15
ENSG00000121900	TMEM54	1.04399	5.33631	0.19564	-2.35373	1.73071e-16
ENSG00000141639	MAPK4	0.385391	1.96963	0.195667	-2.35353	2.44627e-18
ENSG00000216775	RP1-152L7.5	0.942221	4.81312	0.195761	-2.35284	6.22002e-18
ENSG00000237276	ANO7P1	0.131593	0.670354	0.196304	-2.34884	0.000538084
ENSG00000253696	KBTBD11-OT1	0.365231	1.86054	0.196304	-2.34884	0.000538084
ENSG00000150527	CTAGE5	2.74167	13.9422	0.196646	-2.34633	3.16506e-29
ENSG00000280429	AF001548.3	1.32349	6.72239	0.196879	-2.34462	3.0652e-15
ENSG00000164484	TMEM200A	1.49881	7.6074	0.19702	-2.34358	3.63075e-26
ENSG00000205476	CCDC85C	0.720986	3.65747	0.197127	-2.3428	9.28616e-27
ENSG00000139629	GALNT6	0.753132	3.82051	0.197129	-2.34279	3.81641e-25
ENSG00000251405	CTB-109A12.1	0.136129	0.689323	0.197482	-2.34021	7.45732e-05
ENSG00000229167	RP11-73M7.1	0.629508	3.18768	0.197482	-2.34021	7.45732e-05
ENSG00000181392	SYNE4	0.198072	1.00289	0.197503	-2.34006	1.02279e-07
ENSG00000196586	MYO6	2.59097	13.1154	0.197552	-2.3397	1.62926e-29
ENSG00000101210	EEF1A2	0.6677	3.36719	0.198296	-2.33427	3.01454e-11
ENSG00000164093	PITX2	0.099856	0.503013	0.198516	-2.33268	1.04692e-11
ENSG00000223703	AC027612.4	0.217483	1.09358	0.198872	-2.33009	5.01418e-06
ENSG00000225489	RP11-390F4.3	0.15856	0.797298	0.198872	-2.33009	5.01418e-06
ENSG00000116254	CHD5	0.185668	0.932984	0.199005	-2.32913	2.02155e-14
ENSG00000152700	SAR1B	2.28314	11.4678	0.199091	-2.3285	1.13629e-28
ENSG00000180525	PRR26	0.466429	2.34068	0.199271	-2.3272	4.43122e-20
ENSG00000153879	CEBPG	4.35245	21.8237	0.199437	-2.32599	3.60866e-27
ENSG00000156381	ANKRD9	1.10832	5.55108	0.199659	-2.32439	1.63086e-25
ENSG00000050327	ARHGEF5	5.30368	26.5217	0.199975	-2.32211	4.05155e-29
ENSG00000243414	TICAM2	0.468293	2.34085	0.200052	-2.32155	3.88107e-12
ENSG00000153404	PLEKHG4B	0.323729	1.61644	0.200273	-2.31996	2.14917e-19
ENSG00000162630	B3GALT2	0.727314	3.62095	0.200863	-2.31572	3.31145e-15
ENSG00000092820	EZR	10.2451	50.962	0.201033	-2.31449	7.42909e-30
ENSG00000182010	RTKN2	0.151444	0.752811	0.201171	-2.31351	6.28918e-12
ENSG00000174403	C20orf166-AS1	0.385017	1.91012	0.201567	-2.31067	3.05696e-14
ENSG00000139644	TMBIM6	6.05827	29.9948	0.201977	-2.30773	3.72466e-30
ENSG00000186462	NAP1L2	0.0875325	0.432463	0.202404	-2.30469	0.00169524
ENSG00000234509	AP000253.1	0.0999587	0.493857	0.202404	-2.30469	0.00169524
ENSG00000224621	RP11-276H7.3	0.410309	2.02717	0.202404	-2.30469	0.00169524
ENSG00000232093	RP11-307C12.11	0.452603	2.23599	0.202417	-2.3046	0.000112452
ENSG00000238000	RP11-274E7.2	0.516722	2.55276	0.202417	-2.3046	0.000112452
ENSG00000142449	FBN3	0.0561172	0.27722	0.202428	-2.30452	2.71595e-07
ENSG00000243364	EFNA4	0.578989	2.86014	0.202434	-2.30448	6.35885e-12
ENSG00000280228	RP11-67L14.1	0.0769553	0.380146	0.202436	-2.30446	0.000538084
ENSG00000245975	RP11-30K9.6	0.106613	0.526649	0.202436	-2.30446	0.016576
ENSG00000251692	PTX4	0.110001	0.543387	0.202436	-2.30446	0.000538084
ENSG00000274414	RP5-965G21.4	0.0637395	0.314862	0.202436	-2.30446	0.016576
ENSG00000196408	NOXO1	0.0683027	0.337403	0.202436	-2.30446	0.000538084
ENSG00000179300	ZCCHC5	0.112411	0.555289	0.202436	-2.30446	0.000538084
ENSG00000253854	RP11-10N23.2	0.1585	0.782963	0.202436	-2.30446	0.016576
ENSG00000225986	UBXN10-AS1	0.291827	1.44157	0.202436	-2.30446	0.016576
ENSG00000140263	SORD	0.808841	3.9904	0.202696	-2.30261	2.62908e-22
ENSG00000137878	GCOM1	0.354901	1.74769	0.203068	-2.29996	1.63371e-16
ENSG00000101350	KIF3B	9.72996	47.8393	0.203388	-2.29769	1.97876e-29
ENSG00000110090	CPT1A	9.25024	45.411	0.2037	-2.29548	1.53621e-29
ENSG00000168781	PPIP5K1	0.963479	4.72124	0.204073	-2.29284	4.89929e-25
ENSG00000267296	CEBPA-AS1	1.32034	6.45969	0.204396	-2.29056	3.54448e-16
ENSG00000149476	TKFC	1.419	6.92854	0.204805	-2.28768	5.30398e-27
ENSG00000168952	STXBP6	0.233709	1.14075	0.204873	-2.2872	1.51655e-16
ENSG00000162390	ACOT11	1.59458	7.781	0.204932	-2.28678	2.64865e-26
ENSG00000143158	MPC2	3.46782	16.8928	0.205284	-2.2843	4.71957e-24
ENSG00000138759	FRAS1	1.03318	5.01621	0.205968	-2.27951	4.69434e-27
ENSG00000125046	SSUH2	0.271254	1.31603	0.206115	-2.27848	2.11094e-16
ENSG00000137700	SLC37A4	0.754505	3.65001	0.206713	-2.2743	2.04464e-24
ENSG00000104432	IL7	0.12757	0.617036	0.206746	-2.27407	2.15153e-08
ENSG00000227403	AC009299.3	0.144124	0.697104	0.206746	-2.27407	2.54877e-05
ENSG00000272931	RP5-943J3.2	0.642439	3.10738	0.206746	-2.27407	2.54877e-05
ENSG00000072657	TRHDE	0.5048	2.43866	0.206999	-2.2723	5.21407e-21
ENSG00000183230	CTNNA3	1.16624	5.62162	0.207456	-2.26912	4.79259e-25
ENSG00000267060	PTGES3L	0.12784	0.615711	0.20763	-2.26791	2.80702e-07
ENSG00000181315	ZNF322	0.250591	1.20624	0.207746	-2.26711	1.10162e-16
ENSG00000132329	RAMP1	1.5868	7.63443	0.207848	-2.2664	3.05015e-17
ENSG00000148200	NR6A1	0.527647	2.53357	0.208263	-2.26352	2.03597e-19
ENSG00000197576	HOXA4	0.298423	1.42815	0.208958	-2.25871	2.26535e-11
ENSG00000001630	CYP51A1	5.34508	25.5791	0.208963	-2.25868	5.62096e-27
ENSG00000255872	RP11-613M10.9	0.114884	0.549759	0.208971	-2.25863	0.000819566
ENSG00000125347	IRF1	3.1318	14.9772	0.209105	-2.2577	8.94125e-28
ENSG00000166689	PLEKHA7	1.37999	6.58489	0.20957	-2.2545	2.43644e-26
ENSG00000135476	ESPL1	1.08936	5.19758	0.20959	-2.25436	8.48078e-25
ENSG00000165996	HACD1	0.710488	3.38558	0.209857	-2.25252	9.04487e-18
ENSG00000174938	SEZ6L2	0.853829	4.06406	0.210093	-2.2509	1.04307e-19
ENSG00000188211	NCR3LG1	1.32635	6.29609	0.210662	-2.247	2.19098e-23
ENSG00000187210	GCNT1	0.438875	2.08143	0.210852	-2.24569	1.30927e-19
ENSG00000184156	KCNQ3	0.0997893	0.473015	0.210964	-2.24493	1.55093e-14
ENSG00000223839	FAM95B1	0.0147186	0.0696897	0.211202	-2.2433	0.00268218
ENSG00000166183	ASPG	0.0293965	0.139187	0.211202	-2.2433	0.00268218
ENSG00000181649	PHLDA2	0.467534	2.21329	0.21124	-2.24305	3.79475e-05
ENSG00000149782	PLCB3	8.63289	40.8496	0.211333	-2.24241	7.28713e-28
ENSG00000138794	CASP6	0.705272	3.3329	0.211609	-2.24053	4.50628e-17
ENSG00000173930	SLCO4C1	0.767295	3.61807	0.212073	-2.23737	7.13227e-18
ENSG00000006327	TNFRSF12A	1.14874	5.41201	0.212258	-2.23611	1.14152e-17
ENSG00000213214	ARHGEF35	0.734636	3.45898	0.212385	-2.23525	2.46972e-12
ENSG00000105997	HOXA3	0.420328	1.97906	0.212387	-2.23523	8.54304e-18
ENSG00000167315	ACAA2	3.2715	15.3713	0.212831	-2.23222	7.35371e-26
ENSG00000013583	HEBP1	5.49635	25.8145	0.212917	-2.23163	9.25236e-26
ENSG00000152969	JAKMIP1	0.0746019	0.350124	0.213073	-2.23058	0.00016937
ENSG00000108379	WNT3	0.717484	3.36348	0.213316	-2.22894	6.09581e-17
ENSG00000165644	COMTD1	0.63784	2.98373	0.213773	-2.22585	2.50926e-14
ENSG00000067842	ATP2B3	0.043001	0.201051	0.213881	-2.22512	2.23745e-05
ENSG00000223855	HRAT92	0.148566	0.694619	0.213881	-2.22512	2.23745e-05
ENSG00000237125	HAND2-AS1	0.188665	0.881543	0.214017	-2.2242	4.70786e-21
ENSG00000110723	EXPH5	0.0830535	0.388056	0.214025	-2.22415	1.66706e-13
ENSG00000130821	SLC6A8	2.2103	10.3084	0.214418	-2.2215	4.66302e-25
ENSG00000171604	CXXC5	0.917066	4.26828	0.214856	-2.21856	6.27838e-23
ENSG00000264230	ANXA8L1	0.130429	0.606406	0.215085	-2.21702	4.93646e-10
ENSG00000133106	EPSTI1	3.49196	16.2286	0.215173	-2.21643	6.59028e-26
ENSG00000127328	RAB3IP	0.726979	3.37574	0.215354	-2.21522	1.27268e-24
ENSG00000186019	AC084219.4	0.0821593	0.380482	0.215935	-2.21133	0.00124544
ENSG00000099822	HCN2	0.0873425	0.404486	0.215935	-2.21133	0.00124544
ENSG00000219133	RP11-203F10.6	0.92442	4.28097	0.215937	-2.21132	3.79475e-05
ENSG00000130707	ASS1	12.8328	59.3745	0.216133	-2.21001	1.34325e-27
ENSG00000168280	KIF5C	0.485929	2.24133	0.216804	-2.20554	2.08584e-18
ENSG00000155158	TTC39B	2.00919	9.26718	0.216807	-2.20552	4.16897e-26
ENSG00000122873	CISD1	1.11147	5.12456	0.216892	-2.20495	9.98888e-18
ENSG00000101049	SGK2	0.81235	3.74505	0.216913	-2.20481	3.41098e-20
ENSG00000167600	CYP2S1	1.56034	7.19141	0.216973	-2.20441	1.06582e-20
ENSG00000150551	LYPD1	0.25373	1.16796	0.217242	-2.20262	2.38606e-07
ENSG00000137094	DNAJB5	0.447661	2.05675	0.217654	-2.19989	9.64006e-20
ENSG00000141655	TNFRSF11A	1.03379	4.7455	0.217847	-2.19861	4.73996e-24
ENSG00000109062	SLC9A3R1	6.9036	31.68	0.217916	-2.19815	8.74038e-26
ENSG00000085831	TTC39A	0.283647	1.29838	0.218463	-2.19454	4.63519e-16
ENSG00000167912	RP11-25K19.1	0.129315	0.590939	0.21883	-2.19212	0.000254748
ENSG00000111684	LPCAT3	4.19651	19.1691	0.218921	-2.19152	3.65395e-26
ENSG00000036672	USP2	0.700745	3.20088	0.218923	-2.19151	2.82878e-19
ENSG00000160588	MPZL3	0.44003	2.00483	0.219485	-2.1878	1.48813e-14
ENSG00000179841	AKAP5	0.180135	0.819081	0.219924	-2.18493	4.49706e-11
ENSG00000153904	DDAH1	1.93353	8.76054	0.220709	-2.17978	5.12994e-25
ENSG00000117983	MUC5B	0.0115454	0.0522893	0.220799	-2.17919	0.00423033
ENSG00000230666	CEACAM22P	0.0551403	0.24973	0.220799	-2.17919	0.00423033
ENSG00000267374	RP11-244M2.1	0.0565799	0.256251	0.220799	-2.17919	0.00423033
ENSG00000148459	PDSS1	1.35013	6.10842	0.221027	-2.1777	1.73213e-16
ENSG00000182107	TMEM30B	1.23551	5.58747	0.221122	-2.17709	1.26879e-20
ENSG00000168743	NPNT	2.36004	10.6495	0.22161	-2.1739	2.55514e-25
ENSG00000179918	SEPHS2	10.3708	46.7914	0.221638	-2.17372	3.28464e-24
ENSG00000100412	ACO2	10.1426	45.7513	0.221691	-2.17338	2.05492e-26
ENSG00000115339	GALNT3	0.879872	3.95599	0.222415	-2.16867	5.10704e-20
ENSG00000067715	SYT1	0.307361	1.38182	0.222433	-2.16856	5.52437e-17
ENSG00000223561	AC003090.1	0.235076	1.05571	0.222672	-2.16701	4.60189e-07
ENSG00000186912	P2RY4	0.69981	3.14011	0.222862	-2.16578	1.01947e-08
ENSG00000163694	RBM47	2.99097	13.4121	0.223005	-2.16485	1.1061e-26
ENSG00000102575	ACP5	0.594215	2.6644	0.22302	-2.16475	1.23483e-17
ENSG00000174611	KY	0.0337372	0.151032	0.223378	-2.16244	0.000758987
ENSG00000151320	AKAP6	1.09705	4.90478	0.223669	-2.16056	5.55172e-25
ENSG00000197361	FBXL22	0.903326	4.03084	0.224103	-2.15776	2.14253e-16
ENSG00000183048	SLC25A10	0.474374	2.11381	0.224417	-2.15575	3.74698e-14
ENSG00000138829	FBN2	2.54067	11.3206	0.224429	-2.15567	7.19432e-26
ENSG00000259706	HSP90B2P	0.437006	1.94668	0.224487	-2.1553	3.76962e-08
ENSG00000112699	GMDS	2.68445	11.9383	0.224861	-2.1529	6.99341e-23
ENSG00000143891	GALM	1.84043	8.18458	0.224865	-2.15287	3.92909e-20
ENSG00000105255	FSD1	0.0568868	0.252935	0.224907	-2.1526	0.000382556
ENSG00000127743	IL17B	0.246874	1.09767	0.224907	-2.1526	0.000382556
ENSG00000280537	RP11-33O4.2	0.132672	0.589828	0.224934	-2.15243	6.58251e-07
ENSG00000234788	HSPA8P3	0.954049	4.24147	0.224934	-2.15243	6.58251e-07
ENSG00000277971	XXbac-B562F10.12	0.693315	3.06807	0.225978	-2.14575	8.39027e-05
ENSG00000164124	TMEM144	1.78132	7.87317	0.226253	-2.14399	6.12699e-25
ENSG00000172831	CES2	3.06588	13.5496	0.226272	-2.14387	1.5912e-25
ENSG00000262979	CTD-2047H16.2	1.48142	6.54413	0.226374	-2.14322	6.73552e-08
ENSG00000233396	RP11-458D21.1	0.112548	0.49643	0.226714	-2.14105	1.98164e-05
ENSG00000106785	TRIM14	3.99107	17.6023	0.226736	-2.14092	8.52244e-25
ENSG00000274322	RP11-314N13.10	1.05911	4.6632	0.227121	-2.13846	7.06238e-11
ENSG00000177191	B3GNT8	1.06173	4.66426	0.227632	-2.13522	1.93026e-13
ENSG00000188229	TUBB4B	12.8652	56.3439	0.228333	-2.13079	2.16775e-25
ENSG00000180061	TMEM150B	1.18374	5.18303	0.228387	-2.13045	7.77006e-15
ENSG00000100139	MICALL1	2.83118	12.3941	0.22843	-2.13018	3.50006e-24
ENSG00000272463	RP11-532F6.3	0.608218	2.66162	0.228514	-2.12964	7.06238e-11
ENSG00000134755	DSC2	2.17494	9.5166	0.228542	-2.12947	9.89314e-25
ENSG00000162543	UBXN10	0.347286	1.51763	0.228835	-2.12762	1.91361e-11
ENSG00000164023	SGMS2	2.7677	12.0531	0.229625	-2.12265	3.12111e-24
ENSG00000277972	CISD3	0.913046	3.97386	0.229763	-2.12178	8.2781e-17
ENSG00000176387	HSD11B2	1.41827	6.17274	0.229763	-2.12178	8.2781e-17
ENSG00000103089	FA2H	0.424865	1.84615	0.230136	-2.11944	1.19129e-11
ENSG00000204959	ARHGEF34P	1.69121	7.34057	0.230392	-2.11784	1.26344e-19
ENSG00000236809	SNX25P1	0.267635	1.15699	0.231321	-2.11203	0.00664724
ENSG00000008118	CAMK1G	0.0741062	0.320361	0.231321	-2.11203	0.00664724
ENSG00000035499	DEPDC1B	0.450898	1.94898	0.23135	-2.11185	3.78717e-12
ENSG00000112486	CCR6	0.111597	0.482372	0.231351	-2.11184	2.45954e-08
ENSG00000169684	CHRNA5	0.131199	0.567079	0.231359	-2.1118	1.31272e-06
ENSG00000162383	SLC1A7	0.028782	0.124403	0.231362	-2.11178	0.00117769
ENSG00000256356	HSPA8P5	0.143868	0.621832	0.231362	-2.11178	0.00117769
ENSG00000137166	FOXP4	1.35173	5.82459	0.232073	-2.10735	2.88399e-23
ENSG00000064651	SLC12A2	2.811	12.0949	0.232412	-2.10524	7.16368e-25
ENSG00000197181	PIWIL2	0.266323	1.14548	0.2325	-2.1047	3.8621e-12
ENSG00000230795	HLA-K	1.92083	8.25861	0.232585	-2.10417	1.48906e-11
ENSG00000125170	DOK4	1.12511	4.83558	0.232672	-2.10363	4.03561e-21
ENSG00000249709	ZNF564	1.73132	7.43163	0.232966	-2.10181	2.15842e-19
ENSG00000272398	CD24	1.26665	5.43124	0.233215	-2.10027	9.51729e-21
ENSG00000116833	NR5A2	1.84469	7.89895	0.233536	-2.09828	1.29134e-23
ENSG00000108309	RUNDC3A	0.111319	0.475888	0.23392	-2.09592	1.2608e-07
ENSG00000255468	RP11-867G23.8	1.78784	7.63835	0.23406	-2.09505	2.00076e-13
ENSG00000166426	CRABP1	0.498498	2.12678	0.234391	-2.09301	1.23175e-06
ENSG00000115009	CCL20	0.577246	2.46273	0.234392	-2.093	4.13763e-10
ENSG00000196502	SULT1A1	1.50564	6.4214	0.234473	-2.09251	5.33444e-23
ENSG00000213918	DNASE1	2.50814	10.6876	0.234677	-2.09125	1.11813e-24
ENSG00000186314	PRELID2	2.04463	8.70809	0.234797	-2.09052	1.15678e-21
ENSG00000137142	IGFBPL1	0.61272	2.60645	0.235078	-2.08879	6.58386e-06
ENSG00000253570	RNF5P1	1.24019	5.27565	0.235078	-2.08879	6.58386e-06
ENSG00000076716	GPC4	4.48582	19.0283	0.235745	-2.0847	4.83815e-23
ENSG00000161267	BDH1	0.611002	2.58563	0.236306	-2.08127	3.42666e-19
ENSG00000130830	MPP1	3.02368	12.7737	0.23671	-2.07881	5.92889e-24
ENSG00000196924	FLNA	111.198	468.824	0.237185	-2.07592	6.50663e-26
ENSG00000233621	LINC01137	0.906831	3.8209	0.237334	-2.07501	8.19431e-09
ENSG00000205213	LGR4	3.74236	15.7395	0.237769	-2.07237	1.6435e-23
ENSG00000102230	PCYT1B	0.68111	2.86392	0.237824	-2.07203	3.25839e-16
ENSG00000231435	AC011747.3	0.359111	1.50799	0.238139	-2.07012	0.000857787
ENSG00000171004	HS6ST2	0.100958	0.423898	0.238164	-2.06997	2.61601e-06
ENSG00000128596	CCDC136	0.47477	1.99108	0.238449	-2.06825	7.05075e-17
ENSG00000105738	SIPA1L3	6.01047	25.1863	0.23864	-2.06709	5.20276e-25
ENSG00000079156	OSBPL6	0.365623	1.53201	0.238656	-2.067	8.71695e-18
ENSG00000198099	ADH4	0.180215	0.755093	0.238666	-2.06694	7.95389e-08
ENSG00000232838	PET117	0.847823	3.54386	0.239237	-2.06349	2.36033e-07
ENSG00000188916	FAM196A	0.0664575	0.276989	0.239928	-2.05933	3.54976e-05
ENSG00000273906	RP11-115H13.1	0.282145	1.17596	0.239928	-2.05933	3.54976e-05
ENSG00000178235	SLITRK1	0.0573643	0.239089	0.239928	-2.05933	0.00182283
ENSG00000258986	TMEM179	0.0843836	0.351704	0.239928	-2.05933	3.54976e-05
ENSG00000175591	P2RY2	0.783772	3.25455	0.240824	-2.05395	1.69184e-16
ENSG00000101166	PRELID3B	4.21777	17.5087	0.240895	-2.05352	7.977e-22
ENSG00000224259	LINC01133	1.31802	5.47018	0.240946	-2.05322	1.12038e-15
ENSG00000130294	KIF1A	0.610325	2.5327	0.240978	-2.05303	3.06817e-19
ENSG00000128309	MPST	0.984303	4.08364	0.241036	-2.05268	1.84179e-20
ENSG00000227388	RP11-112J3.16	0.511661	2.12144	0.241186	-2.05178	6.27333e-05
ENSG00000100911	PSME2	1.80866	7.4987	0.241197	-2.05172	2.74109e-22
ENSG00000187534	PRR13P5	4.54567	18.8164	0.24158	-2.04943	5.70515e-11
ENSG00000171503	ETFDH	3.64612	15.087	0.241674	-2.04887	2.40777e-22
ENSG00000117115	PADI2	1.55441	6.41545	0.242291	-2.04519	2.22573e-21
ENSG00000164077	MON1A	0.453741	1.87139	0.242462	-2.04417	8.50915e-15
ENSG00000235169	SMIM1	0.163522	0.673254	0.242883	-2.04166	0.0103994
ENSG00000279373	RP11-650L12.4	0.17631	0.725902	0.242883	-2.04166	0.0103994
ENSG00000248493	AC005351.1	0.283979	1.1692	0.242883	-2.04166	0.0103994
ENSG00000166006	KCNC2	0.0169508	0.0697898	0.242883	-2.04166	0.0103994
ENSG00000182366	FAM87A	0.0311699	0.128333	0.242883	-2.04166	0.0103994
ENSG00000172399	MYOZ2	0.0859484	0.353867	0.242883	-2.04166	0.0103994
ENSG00000251611	RP11-610P16.1	0.623486	2.56702	0.242883	-2.04166	0.0103994
ENSG00000070159	PTPN3	1.86386	7.6738	0.242886	-2.04165	8.96576e-23
ENSG00000161249	DMKN	0.0308619	0.12705	0.242912	-2.04149	1.33265e-05
ENSG00000204361	NXPE2	0.47677	1.96261	0.242926	-2.04141	1.00766e-06
ENSG00000274995	RP11-321F6.2	0.631534	2.59969	0.242926	-2.04141	0.000273436
ENSG00000204991	SPIRE2	0.773338	3.18213	0.243025	-2.04082	6.68368e-19
ENSG00000180611	MB21D2	2.05477	8.44499	0.243313	-2.03912	7.42824e-18
ENSG00000119917	IFIT3	3.467	14.2374	0.243513	-2.03793	3.47977e-19
ENSG00000100181	TPTEP1	0.0484455	0.198528	0.244024	-2.03491	3.29063e-06
ENSG00000119703	ZC2HC1C	0.0499561	0.204358	0.244454	-2.03237	5.08771e-05
ENSG00000134982	APC	1.03489	4.23343	0.244457	-2.03235	4.70999e-23
ENSG00000106211	HSPB1	34.8545	142.179	0.245146	-2.02829	2.42691e-24
ENSG00000136305	CIDEB	4.82347	19.6577	0.245373	-2.02695	1.755e-22
ENSG00000054219	LY75	3.04178	12.3937	0.245429	-2.02662	1.10627e-22
ENSG00000204580	DDR1	0.680555	2.77238	0.245477	-2.02634	4.44729e-21
ENSG00000187068	C3orf70	3.44261	13.9928	0.246028	-2.02311	1.14001e-21
ENSG00000128886	ELL3	0.357093	1.45023	0.246232	-2.02191	2.34667e-10
ENSG00000186204	CYP4F12	2.10016	8.52141	0.246457	-2.02059	5.47887e-22
ENSG00000156113	KCNMA1	1.28886	5.22593	0.246627	-2.0196	3.5808e-23
ENSG00000021645	NRXN3	0.49322	1.99907	0.246724	-2.01903	1.89554e-20
ENSG00000269955	C7orf55-LUC7L2	2.46403	9.98663	0.246733	-2.01898	9.05698e-15
ENSG00000221955	SLC12A8	0.262594	1.06298	0.247035	-2.01721	1.35568e-13
ENSG00000128536	CDHR3	0.800939	3.24135	0.247101	-2.01683	5.38626e-19
ENSG00000166402	TUB	1.44859	5.85703	0.247324	-2.01552	1.75128e-19
ENSG00000101188	NTSR1	0.807894	3.26429	0.247494	-2.01453	9.8565e-14
ENSG00000130311	DDA1	1.17342	4.7301	0.248076	-2.01114	3.13934e-17
ENSG00000111261	MANSC1	0.638452	2.5695	0.248473	-2.00884	7.33435e-17
ENSG00000137285	TUBB2B	1.89882	7.63973	0.248545	-2.00842	2.11392e-17
ENSG00000162461	SLC25A34	1.44337	5.80558	0.248617	-2.008	4.80487e-16
ENSG00000087510	TFAP2C	0.0889078	0.356839	0.249154	-2.00489	0.00281319
ENSG00000258998	RP11-398E10.1	0.102501	0.411397	0.249154	-2.00489	0.00281319
ENSG00000276698	RP11-468E2.10	0.452376	1.81565	0.249154	-2.00489	0.00281319
ENSG00000236060	HSPB1P1	1.74412	7.00018	0.249154	-2.00489	0.00040416
ENSG00000059915	PSD	0.72405	2.90369	0.249355	-2.00373	2.44177e-17
ENSG00000102934	PLLP	0.489219	1.96123	0.249445	-2.00321	1.71501e-15
ENSG00000062524	LTK	0.627513	2.51497	0.249511	-2.00283	2.8155e-14
ENSG00000163900	TMEM41A	2.0087	8.04704	0.249619	-2.0022	1.89163e-21
ENSG00000105953	OGDH	11.5456	46.2485	0.249642	-2.00206	6.35516e-24
ENSG00000108370	RGS9	0.432767	1.7334	0.249665	-2.00194	2.79563e-12
ENSG00000133878	DUSP26	0.499827	1.99995	0.24992	-2.00046	3.37711e-10
ENSG00000164542	KIAA0895	0.0717503	0.28668	0.25028	-1.99839	3.36091e-08
ENSG00000049089	COL9A2	0.534203	2.1336	0.250376	-1.99783	1.17748e-13
ENSG00000064601	CTSA	6.18859	24.7018	0.250532	-1.99693	1.50667e-23
ENSG00000107130	NCS1	4.94454	19.7063	0.250912	-1.99475	5.04646e-22
ENSG00000155850	SLC26A2	5.13057	20.3818	0.251723	-1.99009	8.50417e-23
ENSG00000226976	COX6A1P2	6.99046	27.7089	0.252282	-1.98689	4.56225e-11
ENSG00000133313	CNDP2	1.89406	7.48726	0.252971	-1.98295	1.62502e-22
ENSG00000213793	ZNF888	0.675208	2.66861	0.253018	-1.98269	0.00190528
ENSG00000213839	TMX2P1	1.05107	4.15362	0.253049	-1.98251	7.34176e-06
ENSG00000128573	FOXP2	0.212193	0.838027	0.253205	-1.98162	4.39195e-17
ENSG00000106799	TGFBR1	1.64641	6.49886	0.253338	-1.98087	7.89463e-22
ENSG00000089250	NOS1	0.300228	1.18237	0.253922	-1.97755	1.06856e-16
ENSG00000135406	PRPH	0.865554	3.40724	0.254034	-1.97691	1.42968e-15
ENSG00000243587	C6orf183	0.269074	1.05917	0.254042	-1.97686	1.22079e-07
ENSG00000076003	MCM6	7.25821	28.4889	0.254773	-1.97271	7.54717e-22
ENSG00000171497	PPID	3.00077	11.7678	0.254999	-1.97144	1.13103e-17
ENSG00000157152	SYN2	0.507203	1.98851	0.255067	-1.97105	7.87675e-15
ENSG00000101346	POFUT1	7.47163	29.274	0.25523	-1.97013	6.80495e-23
ENSG00000170915	PAQR8	1.58152	6.1957	0.255261	-1.96995	4.60983e-20
ENSG00000111665	CDCA3	0.296001	1.15874	0.255451	-1.96888	8.07814e-14
ENSG00000119227	PIGZ	0.771509	3.01976	0.255487	-1.96868	1.15133e-14
ENSG00000249307	LINC01088	0.0315087	0.123243	0.255663	-1.96769	0.0161862
ENSG00000165807	PPP1R36	0.051383	0.20098	0.255663	-1.96769	0.0161862
ENSG00000168913	ENHO	0.206292	0.80689	0.255663	-1.96769	0.0161862
ENSG00000181260	MTHFD2P7	0.227068	0.888154	0.255663	-1.96769	0.0161862
ENSG00000272555	RP11-459I19.1	0.490567	1.9188	0.255663	-1.96769	0.0161862
ENSG00000152672	CLEC4F	0.231731	0.906271	0.255697	-1.96749	2.69074e-05
ENSG00000224818	RP11-134G8.10	1.1199	4.3798	0.255697	-1.96749	2.69074e-05
ENSG00000172893	DHCR7	1.38934	5.43338	0.255704	-1.96745	1.50269e-18
ENSG00000183775	KCTD16	0.103455	0.404588	0.255705	-1.96745	6.17705e-09
ENSG00000108846	ABCC3	0.754951	2.94508	0.256343	-1.96385	9.41155e-19
ENSG00000114859	CLCN2	0.623684	2.43106	0.256548	-1.9627	8.08227e-15
ENSG00000171365	CLCN5	1.19287	4.64899	0.256587	-1.96248	1.08306e-19
ENSG00000185624	P4HB	19.1066	74.3144	0.257105	-1.95957	1.80147e-23
ENSG00000168765	GSTM4	0.869285	3.37796	0.25734	-1.95825	1.34758e-17
ENSG00000117620	SLC35A3	0.929197	3.60438	0.257797	-1.95569	4.93565e-20
ENSG00000197594	ENPP1	0.947993	3.67673	0.257836	-1.95548	9.84468e-18
ENSG00000118804	STBD1	3.74243	14.5104	0.257914	-1.95504	3.92185e-19
ENSG00000104611	SH2D4A	0.689008	2.67093	0.257965	-1.95475	8.16924e-14
ENSG00000152147	GEMIN6	0.298844	1.15754	0.258171	-1.9536	4.29562e-09
ENSG00000170298	LGALS9B	0.601238	2.32656	0.258424	-1.95219	9.52737e-11
ENSG00000160216	AGPAT3	2.63949	10.2071	0.258593	-1.95125	4.06731e-22
ENSG00000255441	CTD-2616J11.2	0.439031	1.69431	0.259122	-1.9483	0.000104191
ENSG00000249430	CTD-2231H16.1	0.844435	3.25884	0.259122	-1.9483	0.000104191
ENSG00000273108	RP11-416N2.4	0.207865	0.802178	0.259126	-1.94827	0.00432709
ENSG00000137261	KIAA0319	0.0229874	0.088711	0.259126	-1.94827	0.00432709
ENSG00000113763	UNC5A	0.062508	0.241226	0.259126	-1.94827	0.00432709
ENSG00000248144	ADH1C	2.9234	11.2686	0.25943	-1.94659	8.94093e-17
ENSG00000211460	TSN	0.720534	2.77707	0.259459	-1.94642	1.54086e-17
ENSG00000126218	F10	1.13972	4.39184	0.259507	-1.94615	1.03961e-15
ENSG00000106686	SPATA6L	0.381387	1.46633	0.260096	-1.94288	1.72174e-13
ENSG00000223396	RP11-134G8.5	0.287549	1.10485	0.260262	-1.94196	3.81899e-05
ENSG00000125144	MT1G	3.38242	12.9886	0.260415	-1.94111	1.57363e-14
ENSG00000116096	SPR	0.858493	3.29428	0.260601	-1.94008	4.02919e-10
ENSG00000166405	RIC3	0.096781	0.371021	0.26085	-1.93871	2.47451e-09
ENSG00000134780	DAGLA	1.14931	4.40392	0.260973	-1.93803	3.22241e-18
ENSG00000138772	ANXA3	1.09691	4.20307	0.260979	-1.938	3.61779e-17
ENSG00000134323	MYCN	0.142982	0.547434	0.261186	-1.93685	0.00190528
ENSG00000268051	CTC-244M17.1	0.612915	2.34666	0.261186	-1.93685	0.00190528
ENSG00000105854	PON2	3.941	15.0706	0.261502	-1.9351	1.88162e-21
ENSG00000076067	RBMS2	3.03881	11.6196	0.261524	-1.93498	3.0683e-21
ENSG00000185008	ROBO2	0.261015	0.996354	0.261971	-1.93252	5.59156e-16
ENSG00000083857	FAT1	10.8763	41.4956	0.262109	-1.93176	6.12188e-23
ENSG00000113615	SEC24A	8.08057	30.7817	0.262512	-1.92954	3.30626e-22
ENSG00000170775	GPR37	0.295594	1.12554	0.262624	-1.92893	4.98127e-06
ENSG00000005469	CROT	1.99978	7.6093	0.262807	-1.92792	6.80594e-19
ENSG00000188277	C15orf62	0.219777	0.833686	0.26362	-1.92347	0.000196752
ENSG00000188778	ADRB3	0.164066	0.622311	0.263641	-1.92336	9.23913e-07
ENSG00000272631	RP11-359E3.4	0.341084	1.29178	0.264041	-1.92116	2.26111e-10
ENSG00000135750	KCNK1	0.632751	2.39312	0.264404	-1.91918	1.15323e-12
ENSG00000187288	CIDEC	5.77104	21.8014	0.26471	-1.91752	1.34813e-19
ENSG00000148803	FUOM	1.60143	6.04858	0.264761	-1.91724	6.57711e-14
ENSG00000103769	RAB11A	2.51275	9.48963	0.264789	-1.91708	4.57692e-20
ENSG00000204564	C6orf136	0.579136	2.18615	0.264912	-1.91642	3.68117e-13
ENSG00000176945	MUC20	0.77322	2.91476	0.265277	-1.91443	1.75927e-16
ENSG00000260401	RP11-800A3.4	1.30628	4.92169	0.265413	-1.91369	9.96203e-14
ENSG00000164398	ACSL6	0.140983	0.530436	0.265788	-1.91165	3.5506e-12
ENSG00000136542	GALNT5	1.01834	3.81876	0.266669	-1.90688	5.67237e-16
ENSG00000275437	RP5-908M14.10	0.563125	2.1112	0.266733	-1.90653	9.83685e-10
ENSG00000174844	DNAH12	0.0674318	0.252796	0.266744	-1.90647	9.23913e-07
ENSG00000006432	MAP3K9	0.238109	0.892322	0.266842	-1.90594	1.7559e-13
ENSG00000158201	ABHD3	2.06802	7.7492	0.266869	-1.9058	3.12696e-19
ENSG00000187775	DNAH17	0.0571823	0.214211	0.266943	-1.90539	8.36573e-07
ENSG00000257594	GALNT4	3.08735	11.5406	0.267521	-1.90227	4.66436e-19
ENSG00000184307	ZDHHC23	0.236564	0.883251	0.267833	-1.90059	5.04436e-12
ENSG00000099284	H2AFY2	2.24994	8.39717	0.26794	-1.90002	2.88957e-14
ENSG00000107819	SFXN3	7.40383	27.5064	0.269168	-1.89342	1.15354e-21
ENSG00000109063	MYH3	1.20965	4.49375	0.269186	-1.89332	6.13355e-17
ENSG00000150687	PRSS23	1.74332	6.46476	0.269666	-1.89075	4.21116e-20
ENSG00000229589	ACVR2B-AS1	0.147811	0.547671	0.26989	-1.88956	0.00282728
ENSG00000030304	MUSK	0.479289	1.77576	0.269907	-1.88946	2.10188e-11
ENSG00000149527	PLCH2	0.0976166	0.361665	0.269909	-1.88946	4.33043e-10
ENSG00000102996	MMP15	6.34269	23.4993	0.26991	-1.88945	3.39586e-20
ENSG00000169174	PCSK9	0.356258	1.31991	0.26991	-1.88945	2.82076e-10
ENSG00000143603	KCNN3	0.457192	1.69387	0.26991	-1.88945	5.19068e-18
ENSG00000151247	EIF4E	0.482933	1.78924	0.26991	-1.88945	3.80714e-16
ENSG00000170100	ZNF778	0.226645	0.839701	0.269911	-1.88944	4.25036e-13
ENSG00000253647	CTD-2270F17.1	0.24499	0.907639	0.26992	-1.88939	0.00432709
ENSG00000116147	TNR	0.0629842	0.233344	0.26992	-1.88939	6.84948e-06
ENSG00000185813	PCYT2	0.869007	3.1991	0.271641	-1.88023	1.37764e-17
ENSG00000189057	FAM111B	0.368849	1.35763	0.271686	-1.87999	1.30269e-12
ENSG00000140391	TSPAN3	5.25474	19.3412	0.271686	-1.87999	2.22496e-21
ENSG00000177707	PVRL3	1.61097	5.92803	0.271754	-1.87963	6.5766e-18
ENSG00000261390	MAFTRR	0.287308	1.05082	0.273413	-1.87085	3.94303e-06
ENSG00000267288	RP13-890H12.2	0.314821	1.14873	0.27406	-1.86744	1.12694e-05
ENSG00000141504	SAT2	1.26327	4.60673	0.274222	-1.86658	2.26723e-17
ENSG00000230457	PA2G4P4	1.88866	6.88077	0.274484	-1.86521	8.30367e-10
ENSG00000138796	HADH	3.39403	12.3555	0.274698	-1.86408	3.08367e-19
ENSG00000159871	LYPD5	0.0745108	0.270954	0.274994	-1.86253	0.000108551
ENSG00000275549	C9orf173-AS1	1.13741	4.13304	0.275199	-1.86145	4.11297e-09
ENSG00000108861	DUSP3	2.01044	7.30176	0.275336	-1.86073	4.23752e-19
ENSG00000130772	MED18	0.417445	1.51297	0.275911	-1.85773	2.4849e-08
ENSG00000100918	REC8	1.45037	5.25316	0.276094	-1.85677	8.95624e-18
ENSG00000151623	NR3C2	1.14659	4.15272	0.276105	-1.85671	1.02817e-18
ENSG00000176658	MYO1D	3.51801	12.7345	0.276259	-1.85591	2.30607e-20
ENSG00000273387	RP3-412A9.16	0.369412	1.33611	0.276483	-1.85474	0.00041851
ENSG00000183323	CCDC125	0.788453	2.85116	0.276538	-1.85445	3.98179e-17
ENSG00000117069	ST6GALNAC5	1.36151	4.91785	0.276852	-1.85282	6.22511e-16
ENSG00000158769	F11R	5.10159	18.4174	0.276998	-1.85205	7.1076e-20
ENSG00000105928	DFNA5	0.844467	3.04722	0.277127	-1.85138	3.7188e-17
ENSG00000260064	RP11-18F14.4	0.538595	1.93994	0.277634	-1.84874	0.00128926
ENSG00000196388	INCA1	0.186117	0.670369	0.277634	-1.84874	0.00128926
ENSG00000127334	DYRK2	4.25073	15.3095	0.277654	-1.84864	1.96399e-20
ENSG00000103512	NOMO1	2.53777	9.1325	0.277883	-1.84745	1.01905e-18
ENSG00000157184	CPT2	3.19909	11.5088	0.277968	-1.84701	3.82948e-17
ENSG00000164405	UQCRQ	2.10182	7.5524	0.278298	-1.8453	4.37294e-15
ENSG00000167363	FN3K	2.65291	9.5302	0.278369	-1.84493	1.70941e-17
ENSG00000139517	LNX2	3.48989	12.5326	0.278465	-1.84443	4.69651e-18
ENSG00000082497	SERTAD4	0.890322	3.19678	0.278506	-1.84422	2.73042e-14
ENSG00000147155	EBP	1.89441	6.78911	0.279037	-1.84147	1.55892e-15
ENSG00000171517	LPAR3	0.0626751	0.224486	0.279193	-1.84066	0.00418133
ENSG00000189013	KIR2DL4	0.0944023	0.338125	0.279193	-1.84066	0.00418133
ENSG00000264490	WI2-87327B8.1	0.193973	0.694761	0.279193	-1.84066	0.00418133
ENSG00000280240	AL049794.1	0.399226	1.42975	0.279228	-1.84049	4.05448e-05
ENSG00000072110	ACTN1	13.3837	47.8458	0.279727	-1.83791	3.8141e-21
ENSG00000225932	CTAGE4	1.46642	5.23768	0.279975	-1.83663	3.93976e-12
ENSG00000137752	CASP1	3.31418	11.8256	0.280255	-1.83519	1.04057e-18
ENSG00000164120	HPGD	1.70221	6.0711	0.280378	-1.83455	3.0429e-18
ENSG00000109819	PPARGC1A	1.12562	3.99732	0.281592	-1.82832	5.67036e-18
ENSG00000231822	AC019097.7	0.404984	1.43788	0.281653	-1.82801	0.00662995
ENSG00000104635	SLC39A14	4.41332	15.6445	0.2821	-1.82572	3.07816e-20
ENSG00000110721	CHKA	5.90858	20.8986	0.282726	-1.82253	2.22269e-19
ENSG00000135069	PSAT1	2.23633	7.90566	0.282877	-1.82175	4.77952e-14
ENSG00000261884	CTC-479C5.12	0.463742	1.63738	0.283222	-1.81999	1.13675e-10
ENSG00000138792	ENPEP	9.59923	33.855	0.283539	-1.81838	2.12409e-20
ENSG00000120162	MOB3B	3.81765	13.4571	0.28369	-1.81761	6.8909e-19
ENSG00000066583	ISOC1	4.77286	16.8029	0.28405	-1.81578	1.41906e-16
ENSG00000047936	ROS1	0.18048	0.635247	0.28411	-1.81548	2.09485e-07
ENSG00000125848	FLRT3	0.945665	3.32697	0.284242	-1.81481	1.34561e-15
ENSG00000175806	MSRA	1.10565	3.88967	0.284253	-1.81475	2.82218e-15
ENSG00000184564	SLITRK6	0.844432	2.96895	0.284421	-1.8139	1.51373e-11
ENSG00000247400	DNAJC3-AS1	0.292344	1.02758	0.284498	-1.81351	1.00223e-05
ENSG00000178531	CTXN1	0.934578	3.2821	0.28475	-1.81223	1.62689e-06
ENSG00000137824	RMDN3	2.01117	7.06195	0.28479	-1.81203	6.29469e-18
ENSG00000118407	FILIP1	3.26958	11.4769	0.284884	-1.81156	3.3611e-19
ENSG00000132964	CDK8	2.18828	7.67884	0.284975	-1.81109	4.89341e-17
ENSG00000065325	GLP2R	0.52876	1.8523	0.285462	-1.80863	7.20991e-12
ENSG00000166736	HTR3A	0.170223	0.595607	0.285797	-1.80694	2.43484e-05
ENSG00000121073	SLC35B1	1.09554	3.83096	0.285971	-1.80606	5.42695e-17
ENSG00000134317	GRHL1	0.32553	1.13633	0.286474	-1.80352	2.09572e-11
ENSG00000084754	HADHA	41.0563	143.259	0.286588	-1.80295	1.85168e-20
ENSG00000146416	AIG1	1.67839	5.85202	0.286805	-1.80186	1.50946e-17
ENSG00000183734	ASCL2	0.441973	1.53826	0.287321	-1.79926	3.0572e-05
ENSG00000162520	SYNC	3.57445	12.4405	0.287324	-1.79925	1.30107e-17
ENSG00000065609	SNAP91	0.103458	0.359769	0.287569	-1.79802	5.54582e-07
ENSG00000152894	PTPRK	2.88378	10.0203	0.287793	-1.7969	2.3514e-19
ENSG00000165152	TMEM246	0.988175	3.42941	0.288147	-1.79512	1.3666e-13
ENSG00000122971	ACADS	2.64061	9.15515	0.288429	-1.79371	2.41437e-15
ENSG00000187486	KCNJ11	0.0562673	0.194581	0.289171	-1.79	0.00616054
ENSG00000273002	RP11-336K24.12	0.17248	0.596463	0.289171	-1.79	0.00616054
ENSG00000237857	RP11-435O5.2	0.264985	0.916361	0.289171	-1.79	0.00616054
ENSG00000105963	ADAP1	1.1547	3.9929	0.289189	-1.78992	3.15274e-16
ENSG00000118526	TCF21	1.02354	3.53691	0.289389	-1.78892	1.05129e-14
ENSG00000135111	TBX3	3.3674	11.6093	0.290062	-1.78557	8.06258e-19
ENSG00000171587	DSCAM	0.0865384	0.298345	0.290062	-1.78557	3.33746e-05
ENSG00000206077	ZDHHC11B	0.509248	1.75307	0.290488	-1.78345	3.05288e-10
ENSG00000233025	CRYZP1	0.550022	1.89234	0.290657	-1.78261	0.000883481
ENSG00000112186	CAP2	1.48584	5.11174	0.290672	-1.78253	7.48894e-16
ENSG00000117877	CD3EAP	0.159691	0.549364	0.290683	-1.78248	5.76807e-06
ENSG00000185156	MFSD6L	0.544174	1.86907	0.291147	-1.78018	2.88591e-06
ENSG00000280987	MATR3	2.16339	7.4282	0.29124	-1.77972	1.97691e-18
ENSG00000111846	GCNT2	0.6726	2.3091	0.291282	-1.77951	1.41265e-16
ENSG00000198768	APCDD1L	0.143375	0.49186	0.291494	-1.77846	0.000216503
ENSG00000113739	STC2	1.8362	6.29765	0.291569	-1.77809	2.54534e-16
ENSG00000157379	DHRS1	1.16851	4.00748	0.291583	-1.77802	7.63238e-16
ENSG00000167130	DOLPP1	1.44231	4.94238	0.291825	-1.77683	4.60367e-14
ENSG00000173801	JUP	6.52213	22.3329	0.292041	-1.77576	4.90394e-19
ENSG00000106236	NPTX2	1.87275	6.40897	0.292207	-1.77494	1.52359e-13
ENSG00000261553	RP11-29G8.3	2.05622	7.01611	0.293071	-1.77068	8.6631e-15
ENSG00000197208	SLC22A4	1.22383	4.17275	0.29329	-1.7696	8.13505e-11
ENSG00000167700	MFSD3	0.513661	1.74958	0.293591	-1.76812	4.25458e-09
ENSG00000106723	SPIN1	4.11766	14.0046	0.294021	-1.76601	5.15727e-18
ENSG00000109586	GALNT7	1.60999	5.47453	0.294088	-1.76568	7.11638e-17
ENSG00000136868	SLC31A1	5.47515	18.6122	0.294169	-1.76528	4.53967e-18
ENSG00000057657	PRDM1	1.75133	5.9526	0.294212	-1.76507	8.11748e-18
ENSG00000156239	N6AMT1	0.85135	2.89135	0.294447	-1.76392	3.10254e-12
ENSG00000135953	MFSD9	0.54151	1.83906	0.294449	-1.76391	6.82863e-13
ENSG00000168481	LGI3	0.0351308	0.119309	0.294451	-1.7639	0.0101133
ENSG00000243083	LINC00870	0.0852415	0.289493	0.294451	-1.7639	0.0101133
ENSG00000272502	RP11-713M15.2	0.260879	0.885985	0.294451	-1.7639	0.0101133
ENSG00000262413	RP11-498C9.3	0.285118	0.968303	0.294451	-1.7639	0.0101133
ENSG00000224331	AC019181.3	0.960204	3.26099	0.294451	-1.7639	0.0101133
ENSG00000109881	CCDC34	0.198973	0.675731	0.294455	-1.76388	4.57083e-05
ENSG00000270540	RP11-785G17.1	0.289368	0.982723	0.294455	-1.76388	0.00275824
ENSG00000164879	CA3	0.462749	1.57153	0.294458	-1.76387	3.84165e-06
ENSG00000275395	FCGBP	11.4523	38.8647	0.294671	-1.76282	1.02383e-19
ENSG00000112218	GPR63	0.437573	1.48224	0.295211	-1.76018	1.39798e-09
ENSG00000126106	TMEM53	0.508516	1.72122	0.29544	-1.75906	2.24645e-11
ENSG00000212719	C17orf51	0.396746	1.34273	0.295478	-1.75888	2.54823e-11
ENSG00000234072	AC074117.10	0.633306	2.13932	0.296031	-1.75618	2.30104e-09
ENSG00000059573	ALDH18A1	9.81469	33.1522	0.29605	-1.75609	1.026e-18
ENSG00000104833	TUBB4A	0.238963	0.80665	0.296242	-1.75515	9.10707e-09
ENSG00000116176	TPSG1	0.724333	2.44506	0.296243	-1.75515	4.55398e-06
ENSG00000122012	SV2C	0.288497	0.972358	0.296698	-1.75293	6.17709e-11
ENSG00000205702	CYP2D7	0.585661	1.97355	0.296756	-1.75265	1.70943e-09
ENSG00000161533	ACOX1	5.76816	19.4166	0.297073	-1.75111	3.98307e-19
ENSG00000154310	TNIK	2.96775	9.98099	0.29734	-1.74981	3.3771e-18
ENSG00000244187	TMEM141	2.45581	8.2507	0.297649	-1.74832	1.19908e-13
ENSG00000103260	METRN	0.183998	0.617773	0.297841	-1.74738	5.11185e-06
ENSG00000053438	NNAT	1.09867	3.6855	0.298106	-1.7461	1.58157e-09
ENSG00000267681	CTD-3199J23.6	1.73624	5.82022	0.298311	-1.74511	0.000883481
ENSG00000130402	ACTN4	33.7196	112.954	0.298525	-1.74408	1.57492e-19
ENSG00000169692	AGPAT2	7.96217	26.6419	0.298859	-1.74246	7.15932e-18
ENSG00000133818	RRAS2	0.88518	2.95983	0.299065	-1.74147	4.94381e-14
ENSG00000180537	RNF182	0.138134	0.4616	0.29925	-1.74058	3.0661e-06
ENSG00000164362	TERT	0.112275	0.374362	0.29991	-1.7374	0.000156542
ENSG00000099814	CEP170B	3.64923	12.1621	0.30005	-1.73673	4.46403e-18
ENSG00000160113	NR2F6	5.21383	17.3671	0.300213	-1.73594	2.72704e-16
ENSG00000132313	MRPL35	1.97444	6.57305	0.300384	-1.73512	5.52986e-15
ENSG00000154118	JPH3	0.158716	0.528156	0.30051	-1.73451	1.41751e-06
ENSG00000132623	ANKEF1	0.3795	1.26282	0.300519	-1.73447	2.56677e-09
ENSG00000173376	NDNF	0.848361	2.8224	0.300581	-1.73417	8.16165e-11
ENSG00000126803	HSPA2	2.57997	8.56758	0.301132	-1.73153	4.84761e-17
ENSG00000150625	GPM6A	0.21552	0.71531	0.301297	-1.73074	6.91659e-10
ENSG00000259690	CTD-3118D7.1	0.177445	0.588923	0.301303	-1.73071	0.000426762
ENSG00000237523	LINC00857	0.213379	0.708185	0.301303	-1.73071	0.000426762
ENSG00000230183	CNOT6LP1	0.4072	1.35146	0.301303	-1.73071	0.000426762
ENSG00000118894	EEF2KMT	0.206252	0.68371	0.301667	-1.72897	8.80473e-07
ENSG00000259905	PWRN1	0.115858	0.383728	0.301926	-1.72773	8.23111e-05
ENSG00000233008	RP11-475O6.1	0.142876	0.473213	0.301926	-1.72773	8.23111e-05
ENSG00000104549	SQLE	2.13349	7.06609	0.301934	-1.72769	2.2681e-15
ENSG00000272505	RP11-981G7.6	1.405	4.64315	0.302596	-1.72453	5.65926e-11
ENSG00000236830	CBR3-AS1	0.198901	0.65708	0.302704	-1.72402	8.33841e-10
ENSG00000137364	TPMT	3.25163	10.7326	0.302967	-1.72277	7.60348e-15
ENSG00000179299	NSUN7	0.460448	1.5187	0.303185	-1.72173	8.51339e-10
ENSG00000092010	PSME1	6.47224	21.3398	0.303294	-1.72121	2.67533e-17
ENSG00000038210	PI4K2B	3.97292	13.0839	0.303649	-1.71952	9.99697e-16
ENSG00000132932	ATP8A2	0.228516	0.752563	0.30365	-1.71952	3.80233e-09
ENSG00000213846	AC098614.2	2.54305	8.33336	0.305165	-1.71234	5.60662e-13
ENSG00000135052	GOLM1	7.19266	23.5506	0.305413	-1.71117	6.00314e-18
ENSG00000164106	SCRG1	1.02534	3.35559	0.305561	-1.71047	1.27668e-12
ENSG00000153179	RASSF3	14.3453	46.9397	0.305611	-1.71023	1.97058e-18
ENSG00000173905	GOLIM4	8.60947	28.1307	0.306052	-1.70815	8.8779e-18
ENSG00000198948	MFAP3L	0.22531	0.736103	0.306084	-1.708	6.27389e-11
ENSG00000184613	NELL2	0.448382	1.4645	0.306168	-1.70761	2.27228e-12
ENSG00000160685	ZBTB7B	1.68623	5.50618	0.306244	-1.70725	2.51535e-15
ENSG00000165731	RET	0.675309	2.20476	0.306296	-1.707	3.41085e-13
ENSG00000170703	TTLL6	0.0607005	0.198127	0.306371	-1.70665	0.00127928
ENSG00000175536	LIPT2	0.259786	0.847946	0.306371	-1.70665	0.00127928
ENSG00000270194	RP11-259K5.2	0.436091	1.4233	0.306394	-1.70654	1.93841e-05
ENSG00000184992	BRI3BP	3.50352	11.4113	0.307021	-1.70359	1.11588e-16
ENSG00000238083	LRRC37A2	0.614877	2.0027	0.307024	-1.70358	4.86877e-13
ENSG00000008056	SYN1	0.383658	1.24916	0.307133	-1.70306	4.1282e-07
ENSG00000242612	DECR2	0.95994	3.12212	0.307464	-1.70151	2.95778e-14
ENSG00000260947	RP11-384P7.7	0.400754	1.30243	0.307698	-1.70041	1.51394e-06
ENSG00000263155	MYZAP	1.19904	3.89269	0.308025	-1.69888	1.14726e-11
ENSG00000137203	TFAP2A	0.0371059	0.120288	0.308475	-1.69677	0.000612799
ENSG00000185823	NPAP1	0.0395513	0.128213	0.308482	-1.69674	0.0153481
ENSG00000164972	C9orf24	0.122849	0.398237	0.308482	-1.69674	0.0153481
ENSG00000246560	RP11-10L12.4	0.337104	1.09278	0.308482	-1.69674	0.0153481
ENSG00000282206	RP11-141C7.5	2.1887	7.09506	0.308482	-1.69674	0.0153481
ENSG00000115425	PECR	1.45781	4.72098	0.308794	-1.69528	6.81495e-13
ENSG00000083844	ZNF264	0.786042	2.54538	0.308811	-1.6952	4.47084e-15
ENSG00000050030	KIAA2022	0.150066	0.485868	0.308863	-1.69496	5.06822e-09
ENSG00000069956	MAPK6	4.57634	14.8159	0.30888	-1.69488	1.66148e-17
ENSG00000152078	TMEM56	0.676838	2.18523	0.309733	-1.6909	8.52152e-12
ENSG00000101255	TRIB3	1.02071	3.29373	0.309896	-1.69015	2.41298e-11
ENSG00000135045	C9orf40	0.863424	2.78422	0.310113	-1.68913	7.44757e-08
ENSG00000162437	RAVER2	2.71419	8.74474	0.31038	-1.68789	1.94936e-16
ENSG00000171570	RAB4B-EGLN2	0.572799	1.84537	0.310399	-1.68781	3.45088e-07
ENSG00000167797	CDK2AP2	1.7032	5.48192	0.310694	-1.68643	1.37332e-13
ENSG00000136856	SLC2A8	0.668475	2.15144	0.310711	-1.68636	1.72488e-11
ENSG00000250329	KDELC1P1	0.936952	3.01457	0.310808	-1.6859	1.9844e-06
ENSG00000162458	FBLIM1	6.06882	19.5172	0.310947	-1.68526	1.41576e-17
ENSG00000079691	LRRC16A	5.48278	17.6245	0.311089	-1.6846	2.79791e-17
ENSG00000136944	LMX1B	0.056584	0.181703	0.311409	-1.68312	0.0131976
ENSG00000182175	RGMA	1.55092	4.9765	0.311649	-1.68201	4.03263e-17
ENSG00000170558	CDH2	1.83794	5.89723	0.311662	-1.68195	1.22112e-14
ENSG00000275713	HIST1H2BH	3.21496	10.3052	0.311974	-1.6805	1.33219e-12
ENSG00000168386	FILIP1L	0.84844	2.71855	0.312093	-1.67995	3.01412e-15
ENSG00000257702	LBX2-AS1	1.81542	5.81521	0.312185	-1.67953	5.63966e-13
ENSG00000259404	EFTUD1P1	0.595029	1.90596	0.312194	-1.67948	1.20095e-05
ENSG00000226742	HSBP1L1	1.40685	4.50576	0.312234	-1.6793	6.26563e-12
ENSG00000240891	PLCXD2	0.449181	1.43817	0.312328	-1.67887	9.38225e-08
ENSG00000134013	LOXL2	6.30675	20.1638	0.312777	-1.6768	1.00612e-17
ENSG00000253598	SLC10A5	0.492613	1.57459	0.312851	-1.67645	7.09985e-06
ENSG00000260230	FRRS1L	0.272343	0.868875	0.313443	-1.67372	4.1944e-08
ENSG00000232872	CTAGE3P	0.18573	0.592523	0.313456	-1.67366	0.00401524
ENSG00000237361	TUSC8	0.278017	0.886939	0.313456	-1.67366	0.00401524
ENSG00000248596	RP11-844P9.2	0.0626923	0.200003	0.313456	-1.67366	0.00401524
ENSG00000242583	RP11-379K17.9	0.630642	2.0119	0.313456	-1.67366	0.00401524
ENSG00000213560	RP11-386I14.3	1.6061	5.12383	0.313456	-1.67366	0.00011673
ENSG00000157851	DPYSL5	0.112524	0.357842	0.314451	-1.66909	2.20826e-06
ENSG00000114812	VIPR1	1.44714	4.60103	0.314524	-1.66876	1.54166e-15
ENSG00000138449	SLC40A1	13.4909	42.8825	0.314602	-1.6684	9.39913e-18
ENSG00000117118	SDHB	5.79439	18.4128	0.314693	-1.66798	9.35378e-16
ENSG00000223861	RP11-74C1.2	1.05226	3.34181	0.314879	-1.66713	0.0018476
ENSG00000233117	LINC00702	1.03629	3.28996	0.314985	-1.66665	7.31344e-13
ENSG00000149948	HMGA2	0.141217	0.44811	0.315139	-1.66594	7.65598e-09
ENSG00000125378	BMP4	0.838732	2.6558	0.315812	-1.66286	2.50957e-12
ENSG00000271013	LRRC37A9P	0.110738	0.350432	0.316004	-1.66199	0.000878105
ENSG00000262172	CTD-2529O21.1	1.34385	4.25264	0.316004	-1.66199	0.000878105
ENSG00000174469	CNTNAP2	0.418148	1.32285	0.316097	-1.66156	1.41822e-11
ENSG00000100065	CARD10	2.25768	7.13715	0.316328	-1.66051	1.00162e-15
ENSG00000147684	NDUFB9	2.06021	6.51253	0.316346	-1.66043	3.93314e-13
ENSG00000162873	KLHDC8A	0.149372	0.472029	0.316446	-1.65997	9.38434e-06
ENSG00000236753	MKLN1-AS	0.591111	1.86676	0.316651	-1.65904	1.2817e-08
ENSG00000188092	GPR89B	0.780057	2.46267	0.316752	-1.65857	1.79678e-11
ENSG00000213585	VDAC1	8.60047	27.1085	0.317261	-1.65626	7.98209e-17
ENSG00000170502	NUDT9	1.83585	5.78567	0.31731	-1.65604	8.44571e-14
ENSG00000072832	CRMP1	0.679579	2.13909	0.317695	-1.65429	5.02802e-12
ENSG00000229689	AC009237.8	0.194849	0.613043	0.31784	-1.65363	1.79176e-06
ENSG00000100335	MIEF1	0.953855	2.99971	0.317982	-1.65298	3.68919e-15
ENSG00000054938	CHRDL2	2.06789	6.49715	0.318276	-1.65165	1.06779e-13
ENSG00000145476	CYP4V2	2.26935	7.11729	0.31885	-1.64905	2.26215e-16
ENSG00000255185	PDXDC2P	2.21123	6.91326	0.319853	-1.64452	2.00828e-12
ENSG00000168564	CDKN2AIP	0.694393	2.17015	0.319974	-1.64397	7.03608e-10
ENSG00000104341	LAPTM4B	1.52599	4.76474	0.320267	-1.64265	8.0332e-13
ENSG00000029153	ARNTL2	0.452205	1.41168	0.320331	-1.64237	2.8347e-10
ENSG00000175147	TMEM51-AS1	0.45134	1.40869	0.320398	-1.64206	3.38629e-10
ENSG00000111666	CHPT1	1.60417	5.00492	0.320518	-1.64152	7.91828e-15
ENSG00000129173	E2F8	0.644327	2.00493	0.321371	-1.63769	7.7599e-10
ENSG00000278948	RP5-1039K5.12	4.14524	12.8977	0.321394	-1.63758	1.37019e-12
ENSG00000213856	VDAC1P2	2.27616	7.08163	0.321417	-1.63748	3.52945e-07
ENSG00000172020	GAP43	1.91137	5.94122	0.321713	-1.63615	2.11985e-10
ENSG00000139410	SDSL	1.30464	4.04296	0.322694	-1.63176	3.87645e-10
ENSG00000172375	C2CD2L	1.02723	3.18259	0.322765	-1.63144	6.62713e-15
ENSG00000165186	PTCHD1	0.355707	1.10096	0.323087	-1.63001	1.37712e-11
ENSG00000268240	RP11-678G14.4	0.183019	0.565079	0.323882	-1.62646	0.00266073
ENSG00000232466	RP11-337A23.5	1.40019	4.32316	0.323882	-1.62646	0.00266073
ENSG00000136531	SCN2A	0.0678016	0.209338	0.323886	-1.62644	1.46092e-06
ENSG00000175175	PPM1E	0.12512	0.386305	0.323889	-1.62643	0.000219377
ENSG00000115827	DCAF17	0.539189	1.66472	0.323891	-1.62642	1.46226e-12
ENSG00000282057	RP4-621F18.2	0.489014	1.50978	0.323897	-1.62639	1.81671e-07
ENSG00000187672	ERC2	0.0609751	0.188252	0.323902	-1.62637	4.77692e-05
ENSG00000262050	RP11-74E22.3	1.00789	3.11171	0.323902	-1.62637	0.00582377
ENSG00000197472	ZNF695	0.112199	0.346397	0.323902	-1.62637	0.00125538
ENSG00000095637	SORBS1	9.55849	29.4845	0.324187	-1.6251	2.09382e-17
ENSG00000166900	STX3	1.92586	5.93257	0.324624	-1.62316	4.43865e-15
ENSG00000110013	SIAE	1.49948	4.61226	0.325108	-1.62101	1.33748e-14
ENSG00000177685	CRACR2B	0.753958	2.31637	0.325492	-1.61931	6.28131e-13
ENSG00000123836	PFKFB2	3.49034	10.7156	0.325724	-1.61828	3.05033e-16
ENSG00000155846	PPARGC1B	2.52987	7.76653	0.32574	-1.61821	3.70516e-16
ENSG00000212994	RPS26P6	27.5844	84.6369	0.325914	-1.61744	4.11956e-13
ENSG00000156675	RAB11FIP1	3.64029	11.1588	0.326225	-1.61606	7.97801e-17
ENSG00000178882	FAM101A	0.716913	2.19705	0.326307	-1.6157	5.30229e-10
ENSG00000126522	ASL	3.33643	10.2161	0.326584	-1.61447	5.84379e-15
ENSG00000050393	MCUR1	2.73604	8.3764	0.326637	-1.61424	9.98407e-15
ENSG00000066382	MPPED2	0.331824	1.01577	0.326672	-1.61408	2.69811e-09
ENSG00000081181	ARG2	1.14258	3.49762	0.326672	-1.61408	2.69811e-09
ENSG00000186648	LRRC16B	0.193349	0.591758	0.326736	-1.6138	1.19679e-06
ENSG00000254154	RP4-798P15.3	3.10205	9.49373	0.326747	-1.61375	7.72323e-16
ENSG00000237886	NALT1	1.26658	3.87147	0.327158	-1.61194	6.24599e-06
ENSG00000249992	TMEM158	0.738779	2.25567	0.327521	-1.61034	9.70011e-06
ENSG00000100095	SEZ6L	0.201301	0.614414	0.327631	-1.60985	3.51303e-08
ENSG00000276644	DACH1	2.01377	6.14502	0.327707	-1.60952	4.15422e-14
ENSG00000198087	CD2AP	7.73703	23.6077	0.327733	-1.60941	1.40434e-16
ENSG00000229417	NPM1P25	1.4813	4.51962	0.327748	-1.60934	1.63682e-05
ENSG00000161638	ITGA5	16.0504	48.9707	0.327755	-1.60931	3.75099e-17
ENSG00000100744	GSKIP	0.655941	2.00025	0.32793	-1.60854	1.62162e-10
ENSG00000161013	MGAT4B	3.66797	11.1838	0.327971	-1.60836	3.8571e-16
ENSG00000144485	HES6	0.152715	0.465216	0.328268	-1.60705	3.61438e-05
ENSG00000156709	AIFM1	3.20635	9.76506	0.32835	-1.6067	2.00771e-14
ENSG00000102678	FGF9	0.517142	1.57077	0.329228	-1.60284	3.53902e-08
ENSG00000128918	ALDH1A2	0.101041	0.306763	0.329378	-1.60218	1.67389e-06
ENSG00000103154	NECAB2	0.31961	0.970308	0.32939	-1.60213	0.000294925
ENSG00000093217	XYLB	2.40002	7.28313	0.329531	-1.60151	5.99202e-14
ENSG00000244332	RP11-119K6.6	1.26905	3.84693	0.329885	-1.59996	0.000303319
ENSG00000092421	SEMA6A	4.04887	12.2716	0.329937	-1.59974	1.2843e-16
ENSG00000113161	HMGCR	2.45066	7.40676	0.330868	-1.59567	3.05805e-15
ENSG00000112299	VNN1	1.58123	4.77839	0.330912	-1.59548	1.75829e-10
ENSG00000139514	SLC7A1	4.86708	14.7003	0.331087	-1.59472	7.73914e-16
ENSG00000224411	HSP90AA2P	1.18599	3.57804	0.331464	-1.59308	5.25777e-08
ENSG00000014641	MDH1	3.62581	10.9369	0.331522	-1.59282	3.01717e-15
ENSG00000131174	COX7B	4.17086	12.5775	0.331613	-1.59243	7.18393e-14
ENSG00000130396	MLLT4	3.91724	11.8115	0.331647	-1.59228	1.22468e-16
ENSG00000180767	CHST13	0.443559	1.33724	0.331696	-1.59207	2.15975e-05
ENSG00000142444	C19orf52	0.47701	1.43809	0.331696	-1.59207	2.15975e-05
ENSG00000131781	FMO5	0.672816	2.02841	0.331697	-1.59206	2.25187e-11
ENSG00000075234	TTC38	6.34957	19.1356	0.331819	-1.59153	3.3543e-15
ENSG00000146733	PSPH	0.854026	2.57323	0.331889	-1.59123	3.43843e-11
ENSG00000144354	CDCA7	1.31466	3.96107	0.331895	-1.5912	4.60794e-13
ENSG00000214530	STARD10	0.389668	1.17404	0.331902	-1.59117	5.88165e-10
ENSG00000185168	LINC00482	0.239664	0.721436	0.332205	-1.58986	0.00179023
ENSG00000188848	BEND4	0.142583	0.428851	0.332477	-1.58867	1.64899e-07
ENSG00000120149	MSX2	0.151902	0.455607	0.333405	-1.58465	0.00381958
ENSG00000041353	RAB27B	0.386184	1.15825	0.33342	-1.58459	1.42461e-08
ENSG00000135362	PRR5L	0.572185	1.7157	0.3335	-1.58424	2.32756e-12
ENSG00000164715	LMTK2	5.98467	17.9444	0.333512	-1.58419	5.4587e-16
ENSG00000166562	SEC11C	1.09431	3.2801	0.333622	-1.58371	9.50134e-12
ENSG00000166411	IDH3A	1.26124	3.77984	0.333677	-1.58348	1.49462e-14
ENSG00000149260	CAPN5	3.41297	10.1893	0.334957	-1.57795	2.54486e-15
ENSG00000183908	LRRC55	0.330111	0.985242	0.335056	-1.57753	2.12746e-06
ENSG00000254042	CTC-558O2.1	0.110055	0.328457	0.335068	-1.57748	0.00841274
ENSG00000187867	PALM3	0.140363	0.41891	0.335068	-1.57748	0.00841274
ENSG00000253161	LINC01605	0.203879	0.608471	0.335068	-1.57748	0.00841274
ENSG00000133519	ZDHHC8P1	0.173733	0.518494	0.335073	-1.57745	0.000159262
ENSG00000091483	FH	7.29724	21.7725	0.335158	-1.57709	3.47308e-14
ENSG00000232713	AC010733.5	3.15469	9.39611	0.335744	-1.57457	2.84783e-05
ENSG00000162594	IL23R	0.128036	0.380937	0.336108	-1.573	0.000418716
ENSG00000110628	SLC22A18	0.981734	2.9203	0.336176	-1.57271	7.95976e-12
ENSG00000168237	GLYCTK	1.83982	5.47234	0.336204	-1.57259	7.30822e-14
ENSG00000087258	GNAO1	1.41556	4.20674	0.336497	-1.57133	1.11994e-14
ENSG00000221963	APOL6	9.44046	28.0482	0.33658	-1.57098	2.93358e-16
ENSG00000213949	ITGA1	8.38532	24.898	0.336787	-1.57009	1.68951e-16
ENSG00000135929	CYP27A1	3.68119	10.925	0.336951	-1.56939	1.74978e-14
ENSG00000109654	TRIM2	5.01351	14.8759	0.337022	-1.56909	5.17139e-16
ENSG00000105355	PLIN3	5.26144	15.6083	0.337092	-1.56879	2.94585e-15
ENSG00000116017	ARID3A	4.69722	13.9192	0.337464	-1.5672	1.98483e-15
ENSG00000159685	CHCHD6	0.31287	0.925293	0.338131	-1.56435	1.30526e-05
ENSG00000274080	CTA-315H11.2	0.763732	2.25545	0.338617	-1.56227	2.51695e-06
ENSG00000168575	SLC20A2	3.33841	9.85329	0.338811	-1.56145	3.53811e-15
ENSG00000134775	FHOD3	0.868264	2.56259	0.338822	-1.5614	4.36359e-12
ENSG00000197183	NOL4L	3.98042	11.7472	0.33884	-1.56132	6.98267e-16
ENSG00000133028	SCO1	2.60901	7.69923	0.338867	-1.56121	5.00801e-15
ENSG00000270412	RP11-92C4.6	1.52552	4.50077	0.338946	-1.56087	0.00164801
ENSG00000261655	CTD-3064M3.3	2.04702	6.03921	0.338954	-1.56084	2.17587e-09
ENSG00000171174	RBKS	1.46997	4.33676	0.338956	-1.56083	3.53471e-11
ENSG00000263400	TMEM220-AS1	0.686767	2.02457	0.339217	-1.55972	2.53377e-07
ENSG00000162927	PUS10	1.75138	5.16037	0.33939	-1.55899	9.47569e-14
ENSG00000138162	TACC2	1.1405	3.35975	0.33946	-1.55869	4.21213e-15
ENSG00000106305	AIMP2	2.05326	6.04672	0.339566	-1.55824	3.04822e-11
ENSG00000072121	ZFYVE26	6.97081	20.5231	0.339657	-1.55785	3.41356e-16
ENSG00000203727	SAMD5	2.20416	6.48624	0.339821	-1.55715	2.24529e-13
ENSG00000198515	CNGA1	0.157793	0.464252	0.339888	-1.55687	3.7524e-05
ENSG00000141934	PLPP2	0.250105	0.735845	0.339888	-1.55687	1.67217e-07
ENSG00000139344	AMDHD1	0.386614	1.1368	0.340088	-1.55602	8.28972e-06
ENSG00000168556	ING2	1.74798	5.13978	0.340088	-1.55602	2.9429e-08
ENSG00000174145	NWD2	0.223466	0.656813	0.340228	-1.55543	2.20435e-06
ENSG00000006704	GTF2IRD1	2.45388	7.21123	0.340286	-1.55518	3.72479e-14
ENSG00000237190	CDKN2AIPNL	1.50812	4.42914	0.3405	-1.55427	2.59832e-08
ENSG00000081923	ATP8B1	4.61154	13.538	0.340637	-1.55369	2.61692e-15
ENSG00000121858	TNFSF10	4.42113	12.9757	0.340723	-1.55333	1.86022e-14
ENSG00000108823	SGCA	0.589026	1.72765	0.34094	-1.55241	8.35094e-08
ENSG00000254510	RP11-867G23.10	0.58024	1.70184	0.340949	-1.55237	6.51609e-05
ENSG00000278919	AP006285.2	0.273713	0.80279	0.340953	-1.55236	0.00254585
ENSG00000169245	CXCL10	0.50623	1.48475	0.340953	-1.55236	0.00254585
ENSG00000132361	CLUH	4.32726	12.6878	0.341056	-1.55192	2.68793e-15
ENSG00000023330	ALAS1	7.81988	22.9235	0.341129	-1.55161	5.52131e-15
ENSG00000214595	EML6	0.274496	0.803833	0.341484	-1.55011	6.0482e-10
ENSG00000258947	TUBB3	0.431825	1.26443	0.341518	-1.54997	9.88278e-10
ENSG00000198830	HMGN2	2.56659	7.51151	0.341688	-1.54925	3.74489e-14
ENSG00000151150	ANK3	1.45819	4.26536	0.341867	-1.54849	1.30662e-15
ENSG00000146386	ABRACL	5.37652	15.7168	0.342087	-1.54756	3.63043e-11
ENSG00000266903	CTB-171A8.1	0.569489	1.66449	0.342139	-1.54734	6.4902e-05
ENSG00000162813	BPNT1	0.919659	2.68703	0.342259	-1.54684	9.60961e-11
ENSG00000077522	ACTN2	0.185294	0.540888	0.342573	-1.54552	6.59642e-06
ENSG00000242110	AMACR	0.565439	1.65055	0.342577	-1.5455	6.69313e-11
ENSG00000232434	C9orf172	1.23824	3.61354	0.342667	-1.54512	2.47019e-10
ENSG00000237522	NONOP2	2.418	7.05479	0.342745	-1.54479	4.27343e-08
ENSG00000010256	UQCRC1	6.96042	20.2914	0.343024	-1.54362	4.34635e-15
ENSG00000154330	PGM5	8.17557	23.8295	0.343086	-1.54336	1.32955e-15
ENSG00000136059	VILL	1.8939	5.52005	0.343095	-1.54332	6.11371e-14
[truncated: 5,862 more rows]
